# Supplementary material for: Tracing human stem cell lineage during development using DNA methylation
Source: HighWire-hosted journal article supplement (doi:10.1101/gr.233213.117), 2018-08-02
Supplement: Supplemental_File_S1.xlsx [file Supplemental_File_S1.xlsx]

## Sheet: Sheet1
Supplemental File S1. List of 1218 candidate loci detected and the selected candidates
cgid	GeneName(s)	CHR	Coordinates (hg19)	enhancer	genomic_context	Mean methylation adult	Mean methylation cord blood	Δβ	β coefficient linear mixed model	P-value	FDR	Selected_27	Function(s)	Transcript(s)
cg00002033	LRFN1	19	39798481	TRUE	S_Shore	0.86935	0.145615	-0.723735	-0.673084	7.21928e-42	4.2823e-38	FALSE	protein_coding	ENST00000248668.4
cg00003625	WFIKKN2	17	48912543	TRUE		0.853067	0.670277	-0.182789	-0.273335	1.06977e-19	4.91228e-17	FALSE	protein_coding;protein_coding	ENST00000311378.4;ENST00000426127.1
cg00007420	FAXC	6	99796732	NA		0.497915	0.361238	-0.136677	-0.163191	1.74193e-09	1.43335e-07	FALSE	protein_coding;protein_coding	ENST00000389677.5;ENST00000480148.1
cg00026362	LINC01512	6	43858741	TRUE	S_Shore	0.582483	0.374381	-0.208102	-0.213401	1.47727e-18	5.78901e-16	FALSE	.	.
cg00034101	HEYL	1	40098595	TRUE	N_Shore	0.815203	0.392184	-0.423019	-0.404435	1.48628e-35	4.59705e-32	FALSE	protein_coding;antisense	ENST00000372852.3;ENST00000424418.1
cg00034559	TMEM178A;TMEM178A	2	39892124	NA	Island	0.706114	0.410308	-0.295806	-0.300716	4.42603e-41	2.52178e-37	FALSE	antisense;protein_coding;protein_coding;protein_coding;protein_coding	ENST00000415640.1;ENST00000281961.2;ENST00000437068.4;ENST00000482239.4;ENST00000618232.1
cg00062245	ITGA2B	17	42462260	TRUE	Island	0.337591	0.0916094	-0.245981	-0.220403	4.17942e-31	7.41706e-28	FALSE	protein_coding;protein_coding;protein_coding;protein_coding;protein_coding;protein_coding;protein_coding;protein_coding	ENST00000262407.5;ENST00000589645.4;ENST00000591990.4;ENST00000592075.4;ENST00000592226.4;ENST00000592253.4;ENST00000592462.4;ENST00000592944.1
cg00067518	CAMTA1	1	7763225	NA		0.883181	0.635673	-0.247508	-0.327645	1.83035e-26	1.95216e-23	FALSE	protein_coding	ENST00000303635.10
cg00072689	HOXB-AS3;HOXB-AS3;HOXB6	17	46681111	NA	N_Shore	0.432199	0.187771	-0.244427	-0.331078	1.27098e-33	3.10936e-30	FALSE	antisense;antisense;antisense;antisense;antisense;protein_coding;protein_coding;protein_coding;protein_coding	ENST00000466037.5;ENST00000467155.5;ENST00000487849.6;ENST00000491264.4;ENST00000494420.1;ENST00000552000.2;ENST00000225648.3;ENST00000484302.3;ENST00000490419.1
cg00076653	C1QTNF7	4	15341878	NA	S_Shore	0.449824	0.737129	0.287306	0.205932	4.76322e-14	9.35382e-12	FALSE	protein_coding;protein_coding;protein_coding;protein_coding;antisense	ENST00000295297.4;ENST00000397700.5;ENST00000510958.1;ENST00000512144.1;ENST00000502344.4
cg00079023	PURA	5	139492535	NA		0.536859	0.333082	-0.203776	-0.209553	2.4027e-17	7.87594e-15	FALSE	protein_coding;protein_coding;protein_coding	ENST00000331327.4;ENST00000502351.1;ENST00000505703.1
cg00080125	C17orf82;C17orf82	17	59490613	NA		0.512093	0.283815	-0.228278	-0.192307	3.92669e-23	2.84812e-20	FALSE	lincRNA	ENST00000623772.1
cg00083937	MAPK8IP2	22	51039805	NA	Island	0.681145	0.438722	-0.242423	-0.268254	1.19001e-19	5.42988e-17	FALSE	protein_coding;protein_coding	ENST00000463053.1;ENST00000329492.5
cg00085013	FGD5	3	14871570	TRUE	N_Shore	0.486742	0.808049	0.321307	0.311442	3.65375e-17	1.17022e-14	FALSE	protein_coding;protein_coding;protein_coding	ENST00000285046.8;ENST00000457774.1;ENST00000543601.4
cg00116430		1	94188268	TRUE		0.589753	0.331948	-0.257806	-0.324716	6.04682e-18	2.18928e-15	FALSE	protein_coding;protein_coding	ENST00000370244.4;ENST00000469315.1
cg00135497		4	155661849	NA	N_Shore	0.828643	0.128497	-0.700146	-0.657175	1.97758e-46	2.19571e-42	FALSE	protein_coding;protein_coding;protein_coding	ENST00000499392.1;ENST00000502525.4;ENST00000507827.4
cg00172849	COL11A1;COL11A1;COL11A1;COL11A1	1	103574532	TRUE		0.381377	0.178319	-0.203058	-0.160575	3.54244e-16	9.71463e-14	FALSE	protein_coding;protein_coding;protein_coding;protein_coding;protein_coding	ENST00000353414.7;ENST00000358392.5;ENST00000370096.6;ENST00000427239.4;ENST00000512756.4
cg00174279		17	75525361	NA	S_Shore	0.448932	0.360129	-0.0888035	-0.158527	4.07331e-23	2.92993e-20	FALSE	lincRNA;lincRNA;lincRNA;lincRNA	ENST00000586779.1;ENST00000590438.1;ENST00000591481.1;ENST00000592572.1
cg00213295	TMEM132E	17	32925561	TRUE	N_Shelf	0.735534	0.337482	-0.398053	-0.515414	3.06374e-43	2.01008e-39	FALSE	protein_coding	ENST00000321639.5
cg00220225	SEMA3F	3	50194470	TRUE	Island	0.647955	0.482709	-0.165246	-0.284089	4.35719e-26	4.46039e-23	FALSE	protein_coding;protein_coding;protein_coding;protein_coding;protein_coding;antisense;antisense	ENST00000002829.6;ENST00000413852.4;ENST00000414301.4;ENST00000426511.4;ENST00000450338.4;ENST00000425674.1;ENST00000437204.1
cg00254681	PRRT1	6	32118457	NA	N_Shore	0.253747	0.0443219	-0.209425	-0.243619	2.72291e-22	1.77367e-19	FALSE	protein_coding;protein_coding;protein_coding;protein_coding;protein_coding;protein_coding	ENST00000211413.8;ENST00000375150.5;ENST00000428778.4;ENST00000467780.4;ENST00000472641.1;ENST00000495191.4
cg00260802		20	21372203	TRUE		0.256168	0.0769829	-0.179185	-0.116886	6.12805e-11	6.87272e-09	FALSE	.	.
cg00271210	RPS6KA2	6	167070053	TRUE	N_Shore	0.49794	0.247422	-0.250518	-0.335565	1.12107e-19	5.13698e-17	FALSE	protein_coding;protein_coding;protein_coding;protein_coding;protein_coding	ENST00000503859.4;ENST00000506565.1;ENST00000507371.4;ENST00000510118.4;ENST00000512860.4
cg00275479		5	134882430	NA		0.728778	0.380995	-0.347783	-0.384621	1.63659e-31	3.04152e-28	FALSE	.	.
cg00293940		12	60044871	TRUE	S_Shore	0.400582	0.856428	0.455847	0.336963	3.68893e-12	5.20656e-10	FALSE	protein_coding;protein_coding;protein_coding;protein_coding	ENST00000547379.4;ENST00000549465.4;ENST00000552024.4;ENST00000552432.4
cg00303541	GRM2;GRM2	3	51741280	TRUE	Island	0.482629	0.135561	-0.347068	-0.292741	5.5664e-31	9.75851e-28	FALSE	protein_coding;protein_coding;protein_coding;protein_coding;protein_coding	ENST00000296479.8;ENST00000395052.6;ENST00000419928.1;ENST00000464585.1;ENST00000475478.4
cg00307066		4	41880465	NA		0.351858	0.214322	-0.137537	-0.114003	1.84535e-17	6.16092e-15	FALSE	lincRNA	ENST00000504870.1
cg00320094	WLS;WLS	1	68695183	NA	Island	0.690317	0.346209	-0.344108	-0.500721	5.35942e-44	3.86788e-40	FALSE	protein_coding;protein_coding;protein_coding;protein_coding;protein_coding;protein_coding;protein_coding;protein_coding;protein_coding;protein_coding;protein_coding	ENST00000262348.7;ENST00000354777.5;ENST00000370971.1;ENST00000370973.2;ENST00000370976.6;ENST00000471243.2;ENST00000491076.1;ENST00000527864.1;ENST00000530486.4;ENST00000533537.4;ENST00000534713.4
cg00343092	TSPO;TSPO	22	43547974	TRUE	N_Shore	0.0988769	0.40906	0.310183	0.31387	1.36613e-16	3.99163e-14	FALSE	protein_coding;protein_coding;protein_coding;protein_coding;protein_coding;protein_coding	ENST00000329563.7;ENST00000337554.6;ENST00000396265.4;ENST00000428336.4;ENST00000472378.1;ENST00000583777.4
cg00346985		1	46940516	NA	N_Shelf	0.521221	0.230092	-0.291129	-0.308654	2.67603e-23	1.9876e-20	FALSE	lincRNA	ENST00000455247.1
cg00347798		3	45077649	TRUE		0.294126	0.0719604	-0.222166	-0.281831	1.1128e-29	1.70269e-26	FALSE	.	.
cg00363082		5	172654771	NA	S_Shore	0.534949	0.380938	-0.15401	-0.150136	3.36688e-18	1.25359e-15	FALSE	processed_pseudogene	ENST00000521552.1
cg00374672	SLC12A9	7	100463416	NA		0.356629	0.735055	0.378426	0.367614	3.58002e-17	1.14831e-14	FALSE	protein_coding;protein_coding;protein_coding;protein_coding;protein_coding	ENST00000354161.6;ENST00000467972.4;ENST00000475687.4;ENST00000487651.4;ENST00000200457.7
cg00377358	BHLHE23	20	61639277	NA	S_Shore	0.198775	0.0658565	-0.132918	-0.184257	7.50203e-30	1.177e-26	FALSE	protein_coding;protein_coding;lincRNA;lincRNA	ENST00000370346.2;ENST00000612929.1;ENST00000606208.4;ENST00000607802.1
cg00398420		16	56681867	NA		0.425851	0.186288	-0.239562	-0.297787	1.93213e-21	1.1414e-18	FALSE	protein_coding;transcribed_unprocessed_pseudogene;processed_transcript	ENST00000622334.1;ENST00000567054.1;ENST00000568608.1
cg00402417		13	100649423	NA	S_Shore	0.267124	0.143585	-0.123539	-0.0952789	1.90801e-16	5.49337e-14	FALSE	antisense	ENST00000564841.1
cg00407231	KLHDC8A	1	205312199	NA	S_Shore	0.762829	0.395806	-0.367024	-0.316395	8.75208e-23	5.94946e-20	FALSE	protein_coding;protein_coding;protein_coding;protein_coding;protein_coding	ENST00000367155.6;ENST00000367156.6;ENST00000460687.4;ENST00000539253.4;ENST00000607826.1
cg00424169	TEX26;TEX26	13	31506837	NA	S_Shore	0.637132	0.322352	-0.31478	-0.402995	1.0172e-30	1.74096e-27	FALSE	protein_coding;protein_coding;protein_coding;antisense;antisense;antisense;antisense;antisense;antisense;antisense;antisense;antisense;antisense;antisense;antisense;antisense;antisense;antisense;antisense;antisense	ENST00000380473.6;ENST00000479195.1;ENST00000531960.1;ENST00000411835.5;ENST00000429200.2;ENST00000451495.5;ENST00000585582.1;ENST00000585870.4;ENST00000586464.4;ENST00000586973.4;ENST00000587596.4;ENST00000588425.4;ENST00000588726.4;ENST00000589840.1;ENST00000590344.4;ENST00000590721.4;ENST00000591131.1;ENST00000591300.1;ENST00000592950.4;ENST00000593246.4
cg00448875	RAB6B	3	133611626	NA		0.237167	0.806255	0.569088	0.518953	2.37967e-45	2.10294e-41	FALSE	protein_coding;protein_coding;protein_coding;protein_coding;protein_coding;protein_coding;protein_coding	ENST00000285208.7;ENST00000460865.3;ENST00000469959.1;ENST00000477759.4;ENST00000486858.4;ENST00000488969.1;ENST00000543906.4
cg00491255	TEPP;TEPP	16	58019984	NA		0.958172	0.501959	-0.456213	-0.468506	4.58254e-28	5.88819e-25	FALSE	protein_coding;protein_coding;protein_coding;protein_coding	ENST00000290871.8;ENST00000441824.2;ENST00000562915.1;ENST00000569996.4
cg00533649		19	42431930	NA		0.361849	0.279116	-0.0827335	-0.141864	1.71439e-11	2.13016e-09	FALSE	protein_coding;protein_coding;protein_coding;protein_coding	ENST00000594417.1;ENST00000594513.1;ENST00000595770.1;ENST00000599589.4
cg00538381		2	20864068	TRUE		0.781952	0.452046	-0.329906	-0.422347	1.92305e-39	9.57143e-36	FALSE	.	.
cg00547143	GAL	11	68450618	TRUE	S_Shore	0.745384	0.542245	-0.20314	-0.280147	3.17756e-31	5.73308e-28	FALSE	protein_coding;protein_coding	ENST00000265643.3;ENST00000538401.1
cg00560277	GLI3	7	42267269	TRUE	Island	0.146721	0.0520972	-0.0946237	-0.131815	5.58335e-18	2.02656e-15	FALSE	protein_coding;protein_coding;protein_coding;protein_coding	ENST00000395925.6;ENST00000428534.1;ENST00000437480.1;ENST00000448703.4
cg00569896		4	204382	NA	Island	0.59967	0.86624	0.26657	0.407465	5.87929e-34	1.49755e-30	FALSE	.	.
cg00603097	FAM69C	18	72125359	NA	Island	0.398875	0.28247	-0.116405	-0.347858	3.25366e-23	2.38796e-20	FALSE	protein_coding;protein_coding	ENST00000343998.7;ENST00000400291.2
cg00622552	ODF3L1;ODF3L1	15	76016335	TRUE		0.40271	0.253567	-0.149143	-0.263503	2.23644e-18	8.57766e-16	FALSE	protein_coding	ENST00000332145.2
cg00646396		1	26482755	TRUE	Island	0.453604	0.219047	-0.234557	-0.241995	5.20089e-15	1.19221e-12	FALSE	.	.
cg00658151	SDC3	1	31368797	TRUE		0.342482	0.147212	-0.19527	-0.255706	1.62074e-22	1.07475e-19	FALSE	protein_coding	ENST00000339394.6
cg00664406	GRM2;GRM2	3	51740875	TRUE	N_Shore	0.476254	0.155527	-0.320727	-0.192927	7.48455e-19	3.07782e-16	FALSE	protein_coding;protein_coding;protein_coding;protein_coding;protein_coding	ENST00000296479.8;ENST00000395052.6;ENST00000419928.1;ENST00000464585.1;ENST00000475478.4
cg00687135	ZNF385D	3	21792991	NA	S_Shore	0.354684	0.220902	-0.133782	-0.238397	8.84032e-15	1.96108e-12	FALSE	protein_coding;protein_coding;protein_coding;protein_coding;protein_coding	ENST00000281523.5;ENST00000446749.1;ENST00000478967.4;ENST00000494108.1;ENST00000494118.4
cg00700412		12	58011837	NA		0.747952	0.238737	-0.509214	-0.54887	2.92224e-24	2.47145e-21	FALSE	antisense;antisense;antisense;protein_coding;protein_coding	ENST00000356672.3;ENST00000444467.2;ENST00000593846.1;ENST00000477314.1;ENST00000474359.5
cg00701493	EPHB3	3	184280384	NA		0.204801	0.0841823	-0.120618	-0.108681	1.68545e-18	6.53385e-16	FALSE	protein_coding;protein_coding	ENST00000444495.1;ENST00000330394.2
cg00701706	OTOP3	17	72931632	NA	Island	0.544464	0.288259	-0.256206	-0.375932	8.21751e-44	5.64814e-40	FALSE	protein_coding;protein_coding;protein_coding	ENST00000626282.1;ENST00000328801.4;ENST00000580749.1
cg00712841	GDNF;GDNF;GDNF;GDNF	5	37835548	TRUE	S_Shelf	0.503177	0.332809	-0.170369	-0.275819	1.91914e-15	4.73787e-13	FALSE	protein_coding;protein_coding;protein_coding;protein_coding;protein_coding;protein_coding;protein_coding;protein_coding	ENST00000326524.5;ENST00000344622.7;ENST00000381826.7;ENST00000427982.4;ENST00000502572.1;ENST00000510177.4;ENST00000515058.4;ENST00000620847.1
cg00725401		8	70945169	NA		0.168343	0.0705403	-0.0978026	-0.12075	1.56587e-23	1.20665e-20	FALSE	.	.
cg00729885	NBEA	13	36046056	NA	Island	0.490228	0.125091	-0.365137	-0.3388	1.96977e-33	4.68652e-30	FALSE	protein_coding;protein_coding;protein_coding;protein_coding	ENST00000310336.7;ENST00000379939.5;ENST00000400445.6;ENST00000629018.1
cg00730561	SEC31B	10	102279703	TRUE	N_Shore	0.474755	0.193079	-0.281676	-0.253374	2.92335e-14	5.96262e-12	FALSE	protein_coding;protein_coding;protein_coding;protein_coding;protein_coding;protein_coding;protein_coding;protein_coding;protein_coding;protein_coding	ENST00000527595.4;ENST00000528174.4;ENST00000529568.4;ENST00000533549.1;ENST00000557395.4;ENST00000370345.6;ENST00000462434.4;ENST00000479697.4;ENST00000480905.1;ENST00000482456.5
cg00792107		12	133181600	NA	N_Shore	0.316638	0.582523	0.265885	0.253435	1.21488e-29	1.84584e-26	FALSE	protein_coding;protein_coding;protein_coding;protein_coding;protein_coding	ENST00000376608.7;ENST00000544018.5;ENST00000545517.2;ENST00000616042.1;ENST00000622710.3
cg00808170	PCDHGA4;PCDHGA11;PCDHGA11;PCDHGA9;PCDHGA1;PCDHGB1;PCDHGB8P;PCDHGB6;PCDHGB3;PCDHGB7;PCDHGA6;PCDHGA8;PCDHGA10;PCDHGA5;PCDHGB4;PCDHGA3;PCDHGA3;PCDHGB2;PCDHGA7;PCDHGB5	5	140807787	NA	Island	0.554459	0.345807	-0.208653	-0.157713	4.12268e-12	5.75127e-10	FALSE	antisense;protein_coding;protein_coding;protein_coding;protein_coding;protein_coding;protein_coding;protein_coding;protein_coding;protein_coding;protein_coding;protein_coding;protein_coding;protein_coding;protein_coding;protein_coding;protein_coding;protein_coding;protein_coding;protein_coding;protein_coding;unitary_pseudogene;unitary_pseudogene	ENST00000624928.1;ENST00000517417.2;ENST00000398610.2;ENST00000398587.5;ENST00000518882.2;ENST00000394576.2;ENST00000253812.7;ENST00000612467.1;ENST00000571252.2;ENST00000518069.1;ENST00000517434.2;ENST00000518325.1;ENST00000398604.2;ENST00000573521.1;ENST00000523390.1;ENST00000522605.1;ENST00000576222.1;ENST00000519479.1;ENST00000617380.1;ENST00000520790.1;ENST00000398594.3;ENST00000502926.1;ENS…
cg00926318	ENTPD6;ENTPD6	20	25177340	NA		0.250841	0.354501	0.103661	0.242905	3.92887e-17	1.2491e-14	FALSE	protein_coding;protein_coding;protein_coding;protein_coding;protein_coding;protein_coding;protein_coding;protein_coding;protein_coding;protein_coding;protein_coding	ENST00000354989.8;ENST00000360031.5;ENST00000376652.7;ENST00000417467.4;ENST00000418890.4;ENST00000425813.4;ENST00000427553.4;ENST00000433259.5;ENST00000433417.4;ENST00000435520.4;ENST00000439162.4
cg00944421	ESRP2	16	68269483	NA		0.900845	0.299721	-0.601123	-0.552182	5.19257e-27	5.94835e-24	FALSE	protein_coding;protein_coding;protein_coding;protein_coding;protein_coding;protein_coding;protein_coding;protein_coding;protein_coding;protein_coding	ENST00000251366.6;ENST00000473183.5;ENST00000562567.5;ENST00000562724.1;ENST00000562738.4;ENST00000563159.4;ENST00000564382.4;ENST00000564465.1;ENST00000565858.4;ENST00000569964.4
cg00944431		1	10896004	TRUE	S_Shore	0.230807	0.151951	-0.0788558	-0.0988158	1.93416e-10	1.96556e-08	FALSE	.	.
cg00980581	PNPLA1;PNPLA1;PNPLA1	6	36238095	NA	S_Shore	0.44985	0.346021	-0.103829	-0.219678	5.98231e-33	1.31495e-29	FALSE	protein_coding;protein_coding;protein_coding;protein_coding	ENST00000312917.8;ENST00000388715.6;ENST00000394571.3;ENST00000457797.4
cg00989249	N4BP3	5	177548398	TRUE		0.372965	0.579884	0.206919	0.30044	1.42638e-18	5.60481e-16	FALSE	protein_coding	ENST00000274605.5
cg00990385	CFAP73	12	113587690	TRUE	S_Shelf	0.710192	0.43386	-0.276332	-0.366935	6.55678e-36	2.11881e-32	FALSE	protein_coding	ENST00000335621.9
cg00999152	CYP26B1	2	72369887	TRUE		0.797526	0.548278	-0.249247	-0.265969	6.44413e-28	8.13535e-25	FALSE	protein_coding;protein_coding;protein_coding;protein_coding;protein_coding	ENST00000001146.5;ENST00000412253.1;ENST00000461519.1;ENST00000474509.1;ENST00000546307.4
cg01008256	SLC12A9;TRIP6	7	100463985	NA	N_Shore	0.411307	0.91766	0.506353	0.512835	4.03619e-17	1.27946e-14	FALSE	protein_coding;protein_coding;protein_coding;protein_coding;protein_coding;protein_coding;protein_coding;protein_coding;protein_coding;protein_coding;protein_coding	ENST00000354161.6;ENST00000467972.4;ENST00000475687.4;ENST00000487651.4;ENST00000200457.7;ENST00000417475.4;ENST00000437505.4;ENST00000476870.4;ENST00000496260.1;ENST00000619988.3;ENST00000629911.1
cg01035815	ITPR3	6	33600828	NA	N_Shore	0.640196	0.27283	-0.367366	-0.432095	1.16938e-18	4.67556e-16	FALSE	protein_coding;protein_coding	ENST00000374316.8;ENST00000605930.2
cg01048561	DOCK3	3	50711663	NA		0.602758	0.403239	-0.199519	-0.219905	2.92709e-16	8.14054e-14	FALSE	protein_coding;miRNA	ENST00000266037.9;ENST00000607364.1
cg01055562	COG2;COG2	1	230777685	NA	N_Shore	0.543723	0.230633	-0.31309	-0.359865	1.1656e-35	3.68414e-32	FALSE	protein_coding;protein_coding;protein_coding;protein_coding;protein_coding;protein_coding	ENST00000366668.6;ENST00000366669.7;ENST00000468893.5;ENST00000473671.1;ENST00000494371.4;ENST00000534989.1
cg01057635		1	46914672	NA		0.913509	0.575322	-0.338187	-0.376557	4.2159e-45	3.57953e-41	FALSE	lincRNA	ENST00000416581.1
cg01065599	SIM2;SIM2	21	38075171	NA		0.378596	0.216204	-0.162392	-0.17342	1.99206e-20	1.01962e-17	FALSE	antisense;protein_coding;protein_coding;protein_coding	ENST00000430607.1;ENST00000290399.9;ENST00000460783.1;ENST00000481185.1
cg01076874	LRFN1	19	39797966	TRUE	N_Shelf	0.908052	0.457872	-0.45018	-0.436924	5.56582e-35	1.63952e-31	FALSE	protein_coding	ENST00000248668.4
cg01090161	GRM4	6	34032747	NA	N_Shore	0.365045	0.287928	-0.077117	-0.163988	2.54797e-23	1.90555e-20	FALSE	protein_coding;protein_coding;protein_coding;protein_coding;protein_coding;protein_coding;protein_coding;protein_coding;protein_coding;protein_coding;protein_coding	ENST00000374177.6;ENST00000374181.7;ENST00000455714.5;ENST00000535756.4;ENST00000538487.5;ENST00000544773.5;ENST00000545715.4;ENST00000609222.4;ENST00000609278.1;ENST00000609443.1;ENST00000609973.1
cg01099024	SMOC1;SMOC1	14	70347833	NA	S_Shore	0.538512	0.299001	-0.23951	-0.363067	4.35258e-23	3.12561e-20	FALSE	protein_coding;protein_coding;protein_coding	ENST00000361956.6;ENST00000381280.4;ENST00000555917.1
cg01101873	PRDM16;PRDM16	1	3269478	TRUE	Island	0.584184	0.884273	0.300089	0.206363	1.69896e-10	1.7487e-08	FALSE	protein_coding;protein_coding;protein_coding;protein_coding;protein_coding;protein_coding	ENST00000270722.8;ENST00000378391.5;ENST00000463591.1;ENST00000511072.4;ENST00000512462.4;ENST00000514189.4
cg01107185	ZC3HAV1;ZC3HAV1	7	138795041	NA	Island	0.224348	0.44464	0.220291	0.266465	4.06512e-16	1.10431e-13	FALSE	protein_coding;protein_coding;protein_coding	ENST00000242351.8;ENST00000464606.4;ENST00000471652.1
cg01137471	DMRT1	9	841340	TRUE	N_Shore	0.128609	0.0505328	-0.0780759	-0.0966345	9.28011e-14	1.73135e-11	FALSE	protein_coding;protein_coding;protein_coding	ENST00000382276.6;ENST00000564322.1;ENST00000569227.1
cg01184676		4	175135429	NA		0.288879	0.166272	-0.122607	-0.188054	9.58635e-26	9.45572e-23	FALSE	lincRNA	ENST00000515444.4
cg01185080	ZNF710	15	90543813	NA		0.603579	0.243071	-0.360508	-0.301079	5.12054e-20	2.46639e-17	FALSE	protein_coding	ENST00000268154.7
cg01205935	DOCK9;DOCK9	13	99737585	NA	Island	0.805695	0.303713	-0.501982	-0.577131	4.85946e-24	4.0311e-21	FALSE	protein_coding;protein_coding;protein_coding;protein_coding	ENST00000339416.5;ENST00000427887.2;ENST00000448493.5;ENST00000479769.1
cg01215511	FLYWCH1;FLYWCH1	16	2975552	TRUE		0.742367	0.340565	-0.401802	-0.38951	6.95614e-28	8.70559e-25	FALSE	protein_coding;protein_coding;protein_coding;protein_coding	ENST00000253928.12;ENST00000416288.5;ENST00000570425.4;ENST00000573525.1
cg01228134	ECEL1	2	233351921	NA		0.46751	0.101054	-0.366457	-0.327092	6.84371e-30	1.08551e-26	FALSE	protein_coding;protein_coding;protein_coding	ENST00000304546.4;ENST00000409941.1;ENST00000482346.1
cg01229865	ATP11A;ATP11A	13	113528751	NA	N_Shore	0.388496	0.735098	0.346602	0.362363	1.23917e-14	2.68964e-12	FALSE	protein_coding;protein_coding;protein_coding;protein_coding;protein_coding;protein_coding;protein_coding;protein_coding	ENST00000375630.5;ENST00000375645.6;ENST00000415301.1;ENST00000419631.1;ENST00000471555.4;ENST00000487903.4;ENST00000493489.1;ENST00000495930.1
cg01234420	PRR34-AS1	22	46453808	NA	S_Shelf	0.590262	0.916396	0.326134	0.329572	1.11286e-07	5.76144e-06	FALSE	lincRNA;lincRNA	ENST00000381051.5;ENST00000439423.1
cg01278041	WWC2-AS2	4	184018527	NA	N_Shore	0.646634	0.156061	-0.490573	-0.501801	6.52119e-49	8.82435e-45	TRUE	lincRNA	ENST00000578387.1
cg01282174		11	119630144	NA	N_Shelf	0.301398	0.782698	0.4813	0.414772	1.6092e-26	1.72906e-23	FALSE	.	.
cg01285706	BMP3	4	81953041	TRUE	N_Shore	0.212196	0.12092	-0.0912767	-0.118673	8.56708e-14	1.61081e-11	FALSE	protein_coding	ENST00000282701.2
cg01291336	SMARCD3;SMARCD3	7	150949495	TRUE		0.323993	0.0973044	-0.226689	-0.192281	1.29782e-06	4.74582e-05	FALSE	antisense;protein_coding;protein_coding;protein_coding;protein_coding;protein_coding	ENST00000466775.1;ENST00000356800.5;ENST00000392811.5;ENST00000469154.4;ENST00000477169.4;ENST00000491651.1
cg01323777	KCNAB3	17	7832943	NA	Island	0.87653	0.0555391	-0.820991	-0.74477	8.26773e-60	5.11439e-55	FALSE	protein_coding;protein_coding;protein_coding;protein_coding	ENST00000303790.2;ENST00000570587.4;ENST00000570852.1;ENST00000573621.1
cg01324550	HOXB-AS3;HOXB-AS3;HOXB-AS3;HOXB-AS3;HOXB6;HOXB-AS3	17	46676099	NA	Island	0.510952	0.331827	-0.179125	-0.325183	8.78825e-24	7.05287e-21	FALSE	antisense;antisense;antisense;antisense;antisense;antisense;antisense;antisense;antisense;antisense;antisense;antisense;antisense;protein_coding;protein_coding;protein_coding;protein_coding	ENST00000429755.7;ENST00000460041.4;ENST00000465846.5;ENST00000466037.5;ENST00000467155.5;ENST00000474040.4;ENST00000474324.1;ENST00000476204.4;ENST00000477144.1;ENST00000480872.4;ENST00000481995.4;ENST00000487849.6;ENST00000492897.3;ENST00000552000.2;ENST00000225648.3;ENST00000484302.3;ENST00000490419.1
cg01329973		16	86912065	NA	N_Shore	0.178464	0.0886132	-0.089851	-0.129146	5.6308e-23	3.93264e-20	FALSE	.	.
cg01331772		2	131094827	NA	S_Shore	0.736751	0.0701766	-0.666575	-0.567955	1.60416e-45	1.51006e-41	FALSE	.	.
cg01361499		15	75467997	NA	S_Shore	0.456613	0.827219	0.370606	0.397019	2.14788e-10	2.16497e-08	FALSE	.	.
cg01390950		6	34117273	TRUE	S_Shore	0.453411	0.312352	-0.141059	-0.208496	4.90685e-20	2.37138e-17	FALSE	protein_coding	ENST00000374177.6
cg01411255	DDX42;CCDC47;DDX42	17	61851458	NA		0.0442331	0.028886	-0.0153471	-0.0544789	1.49735e-11	1.87936e-09	FALSE	protein_coding;protein_coding;protein_coding;protein_coding;protein_coding;protein_coding;protein_coding;protein_coding;protein_coding;protein_coding	ENST00000225726.8;ENST00000403162.6;ENST00000580986.1;ENST00000582252.1;ENST00000584112.1;ENST00000359353.8;ENST00000389924.5;ENST00000578681.4;ENST00000581135.4;ENST00000583590.4
cg01443755	CNTN1;CNTN1	12	41221639	NA	N_Shore	0.561305	0.235415	-0.325891	-0.361642	1.50824e-20	7.83086e-18	FALSE	protein_coding;protein_coding;protein_coding;protein_coding;protein_coding;protein_coding;protein_coding	ENST00000547702.4;ENST00000547849.4;ENST00000548005.4;ENST00000551295.5;ENST00000551424.4;ENST00000552248.4;ENST00000552913.4
cg01447427	USP21;UFC1;USP21	1	161128567	NA	S_Shore	0.239852	0.542177	0.302325	0.259277	5.10778e-17	1.59119e-14	FALSE	antisense;protein_coding;protein_coding;protein_coding;protein_coding;protein_coding;protein_coding	ENST00000420498.1;ENST00000368003.5;ENST00000289865.11;ENST00000368001.1;ENST00000368002.6;ENST00000479344.1;ENST00000492950.4
cg01467882	FMNL2	2	153192938	NA	Island	0.173372	0.0871152	-0.0862572	-0.101669	2.50593e-12	3.64132e-10	FALSE	protein_coding	ENST00000288670.12
cg01478234	BTBD11;BTBD11	12	107975299	NA	N_Shore	0.808913	0.424958	-0.383955	-0.41706	6.24345e-30	9.97612e-27	FALSE	protein_coding;protein_coding;protein_coding;protein_coding;protein_coding;protein_coding	ENST00000280758.8;ENST00000357167.7;ENST00000415943.5;ENST00000420571.5;ENST00000490090.5;ENST00000550706.4
cg01497154	ADAM33;ADAM33	20	3661910	NA	N_Shore	0.333654	0.232578	-0.101075	-0.21576	2.18866e-23	1.64822e-20	FALSE	protein_coding;protein_coding;protein_coding;protein_coding;protein_coding	ENST00000350009.5;ENST00000356518.5;ENST00000379861.7;ENST00000617732.1;ENST00000619289.3
cg01511232		4	155661929	NA	Island	0.776992	0.180195	-0.596797	-0.596772	2.05933e-33	4.86631e-30	FALSE	protein_coding;protein_coding;protein_coding	ENST00000499392.1;ENST00000502525.4;ENST00000507827.4
cg01511809		4	9500465	NA	S_Shore	0.690142	0.47104	-0.219102	-0.264102	2.98638e-27	3.52359e-24	FALSE	.	.
cg01514490		10	7455338	NA	Island	0.617388	0.252034	-0.365353	-0.332468	1.90442e-19	8.50474e-17	FALSE	TEC	ENST00000623134.1
cg01524860		6	99290284	NA	Island	0.277458	0.164734	-0.112724	-0.137184	1.13187e-18	4.52976e-16	FALSE	.	.
cg01552128	FBXL16	16	743584	NA	Island	0.800844	0.605923	-0.194921	-0.263496	4.40295e-16	1.19309e-13	FALSE	protein_coding;protein_coding;protein_coding;protein_coding;protein_coding	ENST00000324361.8;ENST00000397621.4;ENST00000562563.1;ENST00000562648.2;ENST00000620831.3
cg01566216	SDC3	1	31379146	TRUE		0.700956	0.607287	-0.0936684	-0.202405	1.34339e-20	7.04251e-18	FALSE	protein_coding	ENST00000339394.6
cg01567783		14	103686559	NA	S_Shelf	0.371801	0.248841	-0.122959	-0.205015	1.22282e-17	4.20241e-15	TRUE	.	.
cg01577760	ALDH3B1;ALDH3B1	11	67776123	NA	S_Shore	0.716755	0.891979	0.175224	0.251202	5.47115e-21	3.06482e-18	FALSE	protein_coding	ENST00000614849.3
cg01585860		6	75922610	TRUE	Island	0.0612386	0.387804	0.326565	0.312614	4.39659e-36	1.48432e-32	FALSE	.	.
cg01586506	SOX10	22	38379506	NA	S_Shore	0.967386	0.605799	-0.361587	-0.326666	8.73419e-16	2.27043e-13	FALSE	protein_coding;protein_coding;protein_coding;sense_overlapping;protein_coding;protein_coding;protein_coding;protein_coding;protein_coding	ENST00000405557.4;ENST00000407936.4;ENST00000443002.4;ENST00000623111.1;ENST00000360880.5;ENST00000396884.5;ENST00000427770.1;ENST00000446929.4;ENST00000470555.1
cg01596963	LRRN4CL	11	62455830	NA		0.534561	0.304433	-0.230129	-0.181542	1.47522e-19	6.66108e-17	FALSE	protein_coding	ENST00000317449.4
cg01634146	NFIX	19	13127389	NA	Island	0.933112	0.375755	-0.557357	-0.550588	2.74913e-46	2.90347e-42	FALSE	protein_coding;protein_coding;protein_coding;protein_coding	ENST00000397661.5;ENST00000585382.4;ENST00000590027.1;ENST00000592199.4
cg01644798	GATA4	8	11617305	NA	N_Shore	0.485907	0.328866	-0.157041	-0.281	9.6728e-17	2.89861e-14	FALSE	lincRNA;protein_coding;protein_coding	ENST00000525043.4;ENST00000335135.7;ENST00000528712.4
cg01679043	SYNE1;SYNE1	6	152958548	NA	Island	0.263302	0.149098	-0.114205	-0.122126	3.37736e-10	3.27025e-08	FALSE	protein_coding;protein_coding;protein_coding;protein_coding;protein_coding;protein_coding;protein_coding	ENST00000341594.8;ENST00000367248.6;ENST00000367255.8;ENST00000423061.4;ENST00000461872.5;ENST00000537750.4;ENST00000610489.1
cg01689404		17	35423942	TRUE		0.46448	0.230589	-0.233891	-0.286386	4.04306e-20	1.98269e-17	FALSE	.	.
cg01692252	GRB7	17	37893005	NA	S_Shelf	0.750512	0.593839	-0.156672	-0.28835	6.53423e-23	4.51987e-20	FALSE	protein_coding;protein_coding;protein_coding;protein_coding;protein_coding	ENST00000309156.7;ENST00000485182.4;ENST00000577695.4;ENST00000583813.1;ENST00000584853.1
cg01695406	TMEM190	19	55889276	TRUE	N_Shore	0.839268	0.428502	-0.410766	-0.408915	6.75799e-26	6.7427e-23	FALSE	antisense;protein_coding	ENST00000595064.1;ENST00000291934.3
cg01750261	EMP2	16	10671842	TRUE		0.556485	0.374029	-0.182456	-0.370131	1.65057e-28	2.25466e-25	FALSE	protein_coding;protein_coding;sense_intronic	ENST00000342147.4;ENST00000359543.6;ENST00000566325.1
cg01750375	WISP2	20	43343365	TRUE		0.273727	0.785412	0.511685	0.428397	3.45889e-31	6.21477e-28	FALSE	antisense;antisense;antisense;protein_coding;protein_coding;protein_coding;protein_coding	ENST00000427303.1;ENST00000427598.4;ENST00000445420.4;ENST00000190983.4;ENST00000372865.4;ENST00000372868.5;ENST00000497421.1
cg01762581	DKK4;DKK4	8	42234614	TRUE		0.68403	0.439201	-0.244829	-0.235988	5.63796e-17	1.74506e-14	FALSE	protein_coding	ENST00000220812.2
cg01763890		5	76936793	NA	Island	0.288267	0.154032	-0.134235	-0.102678	2.95949e-16	8.22536e-14	FALSE	protein_coding	ENST00000306422.4
cg01791104	PIGV	1	27113753	NA		0.0980914	0.0485516	-0.0495398	-0.0697111	2.55143e-16	7.18814e-14	FALSE	protein_coding;protein_coding;protein_coding;protein_coding;protein_coding	ENST00000078527.7;ENST00000374145.4;ENST00000430292.4;ENST00000431541.4;ENST00000472757.4
cg01794805	RARB;RARB	3	25493807	TRUE	Island	0.604126	0.84201	0.237884	0.353218	7.82118e-31	1.34393e-27	FALSE	protein_coding;protein_coding;protein_coding;protein_coding;protein_coding;protein_coding;protein_coding	ENST00000330688.7;ENST00000383772.7;ENST00000437042.5;ENST00000462272.4;ENST00000479097.4;ENST00000480001.4;ENST00000489694.4
cg01826574	DMRT1	9	843179	NA		0.189785	0.0595121	-0.130273	-0.111653	7.96731e-15	1.77651e-12	FALSE	protein_coding;protein_coding;protein_coding	ENST00000382276.6;ENST00000564322.1;ENST00000569227.1
cg01845041	IGSF11;IGSF11	3	118753005	NA		0.522445	0.215616	-0.306829	-0.282639	1.20869e-10	1.27936e-08	FALSE	protein_coding;protein_coding;protein_coding;protein_coding;protein_coding;protein_coding;protein_coding;protein_coding	ENST00000354673.5;ENST00000393775.5;ENST00000425327.5;ENST00000441144.5;ENST00000480431.4;ENST00000489689.4;ENST00000491903.1;ENST00000494802.1
cg01847344	TSPEAR	21	45929576	NA		0.585968	0.830919	0.244951	0.22535	3.90539e-24	3.27099e-21	FALSE	protein_coding;protein_coding;protein_coding;protein_coding;antisense;antisense	ENST00000323084.7;ENST00000397916.1;ENST00000613245.3;ENST00000614657.3;ENST00000430181.1;ENST00000451035.2
cg01856162	ECEL1	2	233350940	NA	S_Shelf	0.395097	0.0542617	-0.340835	-0.263562	3.26956e-29	4.78303e-26	FALSE	protein_coding;protein_coding;protein_coding	ENST00000304546.4;ENST00000409941.1;ENST00000482346.1
cg01894038		11	77741873	TRUE		0.563887	0.862544	0.298657	0.254611	4.03186e-07	1.75323e-05	FALSE	protein_coding;protein_coding;protein_coding;protein_coding;protein_coding	ENST00000533144.1;ENST00000612612.3;ENST00000614236.1;ENST00000528251.1;ENST00000530054.1
cg01912955	SIM1	6	100906383	NA		0.27726	0.174392	-0.102868	-0.0996399	3.08199e-14	6.26552e-12	FALSE	protein_coding;protein_coding	ENST00000262901.4;ENST00000369208.6
cg01930719	RIPOR1	16	67575562	NA		0.428242	0.830048	0.401806	0.426615	1.75735e-17	5.88526e-15	FALSE	protein_coding;protein_coding;protein_coding;protein_coding;protein_coding;protein_coding;protein_coding;protein_coding;protein_coding;protein_coding;protein_coding	ENST00000042381.7;ENST00000379312.6;ENST00000422602.5;ENST00000428437.5;ENST00000540839.6;ENST00000564616.1;ENST00000566559.4;ENST00000569179.1;ENST00000569253.4;ENST00000569474.4;ENST00000569733.5
cg01940273		2	233284934	NA	N_Shore	0.566137	0.340083	-0.226053	-0.25307	7.42637e-38	2.92341e-34	FALSE	unprocessed_pseudogene	ENST00000373592.2
cg01986016	HOXB-AS3;HOXB-AS3;HOXB6	17	46681154	NA	N_Shore	0.478394	0.187166	-0.291229	-0.384411	2.64528e-36	9.09089e-33	FALSE	antisense;antisense;antisense;antisense;antisense;protein_coding;protein_coding;protein_coding;protein_coding	ENST00000466037.5;ENST00000467155.5;ENST00000487849.6;ENST00000491264.4;ENST00000494420.1;ENST00000552000.2;ENST00000225648.3;ENST00000484302.3;ENST00000490419.1
cg01989908	NFIX	19	13120555	TRUE		0.587425	0.361068	-0.226357	-0.291487	4.3809e-22	2.77747e-19	FALSE	protein_coding;protein_coding	ENST00000397661.5;ENST00000592199.4
cg01997590		2	223177473	TRUE	Island	0.367981	0.211648	-0.156333	-0.131412	4.79521e-16	1.2913e-13	FALSE	.	.
cg02001279	ARID3A	19	940967	TRUE		0.216449	0.64604	0.429591	0.479498	1.67098e-18	6.48356e-16	FALSE	protein_coding;protein_coding;protein_coding	ENST00000263620.6;ENST00000457152.3;ENST00000587532.4
cg02032558		4	155662438	NA	N_Shore	0.299899	0.102252	-0.197647	-0.192921	1.54625e-22	1.03167e-19	FALSE	protein_coding;protein_coding;protein_coding	ENST00000499392.1;ENST00000502525.4;ENST00000507827.4
cg02034910	NOL3	16	67207062	NA		0.789866	0.615781	-0.174085	-0.198134	9.37063e-18	3.25916e-15	FALSE	protein_coding;protein_coding;protein_coding;protein_coding;protein_coding;protein_coding;protein_coding;protein_coding;protein_coding;protein_coding	ENST00000268605.10;ENST00000563258.1;ENST00000563439.4;ENST00000564053.4;ENST00000564992.1;ENST00000565560.4;ENST00000565645.1;ENST00000566871.4;ENST00000568146.1;ENST00000568503.1
cg02042310		1	46940420	NA	Island	0.267431	0.139914	-0.127517	-0.108565	1.35851e-13	2.47479e-11	FALSE	lincRNA	ENST00000455247.1
cg02049180	NTRK1;INSRR	1	156828202	TRUE	S_Shore	0.850612	0.671535	-0.179077	-0.276939	3.49986e-26	3.6343e-23	FALSE	protein_coding;protein_coding;protein_coding;protein_coding;protein_coding	ENST00000368195.3;ENST00000392302.5;ENST00000489021.5;ENST00000497019.5;ENST00000530298.4
cg02056653	PCDHGA4;PCDHGC3;PCDHGA12;PCDHGA11;PCDHGA11;PCDHGA9;PCDHGA1;PCDHGB1;PCDHGB6;PCDHGB3;PCDHGB7;PCDHGA6;PCDHGA8;PCDHGA10;PCDHGA5;PCDHGB4;PCDHGB4;PCDHGA3;PCDHGA2;PCDHGA7;PCDHGB2;PCDHGC5;PCDHGB5;PCDHGC3	5	140888468	TRUE	N_Shore	0.375069	0.117478	-0.25759	-0.276626	2.80121e-12	4.03383e-10	FALSE	protein_coding;protein_coding;protein_coding;protein_coding;protein_coding;protein_coding;protein_coding;protein_coding;protein_coding;protein_coding;protein_coding;protein_coding;protein_coding;protein_coding;protein_coding;protein_coding;protein_coding;protein_coding;protein_coding;protein_coding;protein_coding;protein_coding;protein_coding;protein_coding;protein_coding;protein_coding;protein_c…	ENST00000517417.2;ENST00000398610.2;ENST00000398587.5;ENST00000518882.2;ENST00000252085.3;ENST00000394576.2;ENST00000253812.7;ENST00000612467.1;ENST00000571252.2;ENST00000518069.1;ENST00000517434.2;ENST00000518325.1;ENST00000398604.2;ENST00000573521.1;ENST00000523390.1;ENST00000522605.1;ENST00000576222.1;ENST00000519479.1;ENST00000617380.1;ENST00000520790.1;ENST00000398594.3;ENST00000308177.4;ENS…
cg02066331	RBM24;RBM24;RBM24	6	17282778	NA	Island	0.59322	0.416154	-0.177067	-0.264589	2.59862e-14	5.34814e-12	FALSE	protein_coding;protein_coding;protein_coding;protein_coding;protein_coding;protein_coding	ENST00000318204.5;ENST00000379052.8;ENST00000425446.5;ENST00000503965.4;ENST00000504055.1;ENST00000509686.4
cg02150077		16	87098542	NA	N_Shore	0.637533	0.144416	-0.493117	-0.649121	7.406e-30	1.16616e-26	FALSE	.	.
cg02186444	ARMC7	17	73120977	NA	S_Shelf	0.634861	0.827722	0.192861	0.1972	3.21489e-11	3.79113e-09	FALSE	protein_coding;protein_coding;protein_coding	ENST00000245543.4;ENST00000579096.1;ENST00000581078.1
cg02218496		2	172948176	NA	Island	0.320736	0.139161	-0.181575	-0.122546	2.1559e-12	3.16373e-10	FALSE	protein_coding;protein_coding	ENST00000361609.4;ENST00000469444.5
cg02231404	SOX18	20	62679635	NA	Island	0.58552	0.0795955	-0.505924	-0.377461	1.13325e-31	2.13355e-28	FALSE	protein_coding;protein_coding	ENST00000340356.8;ENST00000450537.4
cg02254407	PLEKHB1;PLEKHB1;PLEKHB1;PLEKHB1	11	73357159	NA		0.90015	0.551589	-0.348562	-0.344745	2.11738e-20	1.07866e-17	FALSE	protein_coding;protein_coding;protein_coding;protein_coding;protein_coding	ENST00000227214.9;ENST00000354190.8;ENST00000398492.7;ENST00000398494.7;ENST00000536527.4
cg02257791		14	22217085	NA	N_Shelf	0.691391	0.348448	-0.342943	-0.419795	7.99748e-34	2.00402e-30	FALSE	processed_pseudogene;TR_V_gene	ENST00000496596.1;ENST00000390427.3
cg02283735	PTPRF;PTPRF	1	44011587	TRUE	N_Shore	0.644969	0.260136	-0.384832	-0.542515	3.29365e-25	3.05398e-22	FALSE	protein_coding;protein_coding;protein_coding;protein_coding;protein_coding;protein_coding;protein_coding;protein_coding	ENST00000359947.7;ENST00000372405.1;ENST00000436724.4;ENST00000437607.1;ENST00000438120.4;ENST00000481019.4;ENST00000496043.4;ENST00000617451.3
cg02294302	FOXD2;FOXD2	1	47906276	NA	Island	0.386259	0.183741	-0.202518	-0.244921	6.38004e-23	4.43447e-20	FALSE	protein_coding	ENST00000334793.5
cg02341119	MGAT5B	17	74866479	NA	N_Shore	0.361953	0.137066	-0.224887	-0.21678	1.2079e-32	2.51463e-29	FALSE	protein_coding;protein_coding;protein_coding;protein_coding	ENST00000301618.7;ENST00000374998.3;ENST00000565675.1;ENST00000569840.5
cg02449166	EBF3	10	131748481	TRUE	S_Shore	0.194088	0.0672046	-0.126884	-0.0997955	1.51029e-09	1.26179e-07	FALSE	protein_coding;protein_coding	ENST00000355311.8;ENST00000368648.6
cg02478731		17	41632391	TRUE	Island	0.493636	0.134905	-0.358731	-0.433046	4.81302e-38	1.92975e-34	FALSE	protein_coding;antisense	ENST00000586764.1;ENST00000588996.1
cg02481642	WISP2	20	43343760	TRUE		0.242352	0.835806	0.593453	0.471973	4.37027e-28	5.63216e-25	FALSE	antisense;antisense;antisense;protein_coding;protein_coding;protein_coding;protein_coding	ENST00000427303.1;ENST00000427598.4;ENST00000445420.4;ENST00000190983.4;ENST00000372865.4;ENST00000372868.5;ENST00000497421.1
cg02489552	CCDC105	19	15121531	NA	Island	0.555313	0.193836	-0.361477	-0.338441	6.49353e-34	1.64434e-30	FALSE	protein_coding;protein_coding;protein_coding;protein_coding	ENST00000292574.3;ENST00000430939.5;ENST00000595863.1;ENST00000599636.1
cg02532017	SNED1	2	241974917	TRUE	S_Shore	0.79704	0.371661	-0.425379	-0.440493	4.51249e-31	7.94304e-28	FALSE	antisense;protein_coding;protein_coding;protein_coding;protein_coding	ENST00000458377.1;ENST00000310397.11;ENST00000401884.4;ENST00000405547.6;ENST00000493358.1
cg02555807		15	40615100	NA	S_Shelf	0.74444	0.465972	-0.278468	-0.312505	4.87216e-36	1.62287e-32	FALSE	.	.
cg02566861	HOXB-AS3;HOXB-AS3;HOXB-AS3;HOXB-AS3;HOXB6;HOXB-AS3	17	46679516	NA	Island	0.388786	0.0916611	-0.297125	-0.269804	1.18376e-27	1.44799e-24	FALSE	antisense;antisense;antisense;antisense;antisense;antisense;antisense;antisense;antisense;antisense;antisense;antisense;protein_coding;protein_coding;protein_coding;protein_coding	ENST00000429755.7;ENST00000465846.5;ENST00000466037.5;ENST00000467155.5;ENST00000474324.1;ENST00000477144.1;ENST00000480872.4;ENST00000481995.4;ENST00000487849.6;ENST00000491264.4;ENST00000492897.3;ENST00000494420.1;ENST00000552000.2;ENST00000225648.3;ENST00000484302.3;ENST00000490419.1
cg02571874	TMEM40	3	12799985	TRUE	S_Shore	0.324484	0.632071	0.307586	0.300585	1.21211e-16	3.57783e-14	FALSE	protein_coding;protein_coding;protein_coding;protein_coding	ENST00000264728.8;ENST00000314124.10;ENST00000435218.5;ENST00000435575.4
cg02579509	SLC26A4-AS1;SLC26A4	7	107302712	NA	S_Shore	0.558947	0.367502	-0.191445	-0.213754	6.70685e-18	2.40612e-15	FALSE	protein_coding;protein_coding;antisense;antisense;antisense;antisense;antisense;antisense;antisense;antisense	ENST00000265715.6;ENST00000440056.1;ENST00000440512.2;ENST00000449741.1;ENST00000587899.2;ENST00000591896.4;ENST00000626388.1;ENST00000627161.1;ENST00000629014.1;ENST00000630476.1
cg02606058	FBXL8	16	67195658	NA	N_Shore	0.877609	0.481887	-0.395722	-0.374419	1.45448e-23	1.13481e-20	FALSE	protein_coding;protein_coding;protein_coding;protein_coding;protein_coding;protein_coding;protein_coding;protein_coding;protein_coding	ENST00000258200.6;ENST00000517382.4;ENST00000518148.1;ENST00000519378.1;ENST00000519917.4;ENST00000519945.4;ENST00000521920.4;ENST00000523893.1;ENST00000345057.7
cg02619205	AKNA	9	117157157	NA	Island	0.322549	0.734257	0.411708	0.367446	1.67344e-24	1.44348e-21	FALSE	protein_coding	ENST00000307564.7
cg02625222	CRB2	9	126135169	NA	Island	0.579568	0.251832	-0.327736	-0.463292	1.22899e-29	1.86075e-26	FALSE	protein_coding;protein_coding;protein_coding	ENST00000359999.6;ENST00000373631.6;ENST00000460253.1
cg02630477		1	40388223	NA		0.874471	0.578246	-0.296225	-0.323777	2.22938e-28	2.98873e-25	FALSE	.	.
cg02637282		12	98768240	NA	S_Shelf	0.161853	0.709638	0.547785	0.639672	1.30388e-50	2.35252e-46	FALSE	.	.
cg02645340	URAD	13	28553783	NA	N_Shore	0.728963	0.392633	-0.33633	-0.446795	7.79426e-32	1.49339e-28	FALSE	protein_coding	ENST00000332715.5
cg02646021		2	223176846	NA	N_Shelf	0.187081	0.0782735	-0.108807	-0.0967064	2.32398e-17	7.64103e-15	FALSE	.	.
cg02672759		19	39739058	NA	Island	0.771611	0.477051	-0.29456	-0.405552	1.35103e-28	1.86908e-25	FALSE	polymorphic_pseudogene;polymorphic_pseudogene;polymorphic_pseudogene	ENST00000606380.1;ENST00000610963.1;ENST00000616270.3
cg02699194		2	241902062	NA	S_Shore	0.822264	0.667896	-0.154369	-0.211129	8.48285e-21	4.60881e-18	FALSE	protein_coding;processed_transcript	ENST00000443866.2;ENST00000418218.4
cg02721902		17	46825371	NA	N_Shelf	0.361882	0.170537	-0.191345	-0.123863	1.16302e-09	9.96459e-08	FALSE	.	.
cg02734505	ZNF385A;ZNF385A;ZNF385A	12	54763081	NA		0.389671	0.0674691	-0.322202	-0.53142	8.75527e-21	4.75086e-18	FALSE	antisense;antisense;protein_coding;protein_coding;protein_coding;protein_coding;protein_coding;protein_coding	ENST00000550474.4;ENST00000552785.1;ENST00000338010.8;ENST00000352268.9;ENST00000394313.5;ENST00000546970.4;ENST00000550779.4;ENST00000551109.4
cg02742555	INSC;INSC	11	15200692	TRUE	Island	0.159786	0.502956	0.34317	0.28668	3.4276e-16	9.43554e-14	FALSE	protein_coding;protein_coding;protein_coding;protein_coding;protein_coding;protein_coding	ENST00000379554.6;ENST00000379556.6;ENST00000424273.4;ENST00000525218.1;ENST00000528567.4;ENST00000530161.4
cg02771142	PAX6;PAX6;PAX6	11	31819678	TRUE	S_Shore	0.206131	0.107762	-0.0983688	-0.0915812	3.66232e-15	8.68008e-13	FALSE	protein_coding;protein_coding;protein_coding;protein_coding;protein_coding;protein_coding;protein_coding;protein_coding;protein_coding;protein_coding;protein_coding;protein_coding;protein_coding;protein_coding;protein_coding;protein_coding;protein_coding;protein_coding	ENST00000241001.11;ENST00000379107.5;ENST00000379109.5;ENST00000379111.5;ENST00000379115.7;ENST00000379123.8;ENST00000379129.5;ENST00000379132.6;ENST00000419022.4;ENST00000455099.4;ENST00000464174.4;ENST00000470027.5;ENST00000471303.4;ENST00000494377.5;ENST00000530373.4;ENST00000531910.4;ENST00000533333.4;ENST00000606377.4
cg02789485	GLIPR1L2	12	75783428	NA	Island	0.330049	0.628879	0.29883	0.314643	2.28885e-09	1.83642e-07	FALSE	protein_coding;protein_coding;protein_coding;protein_coding;protein_coding;protein_coding;protein_coding;protein_coding;protein_coding;protein_coding;protein_coding;protein_coding;protein_coding	ENST00000328705.6;ENST00000336815.9;ENST00000436898.4;ENST00000486196.1;ENST00000547320.1;ENST00000548035.1;ENST00000548958.2;ENST00000551829.4;ENST00000552497.4;ENST00000320460.7;ENST00000378692.6;ENST00000547164.1;ENST00000550916.4
cg02812891	ECEL1P2	2	233251773	TRUE		0.620239	0.0256419	-0.594597	-0.534583	3.04353e-57	1.46433e-52	FALSE	transcribed_unprocessed_pseudogene;transcribed_unprocessed_pseudogene	ENST00000461596.1;ENST00000465689.1
cg02849695	CFAP45	1	159869960	TRUE		0.41322	0.0777905	-0.335429	-0.403272	3.70244e-21	2.12911e-18	FALSE	protein_coding;protein_coding;protein_coding;miRNA	ENST00000368099.7;ENST00000476696.4;ENST00000479940.2;ENST00000584466.1
cg02863169		2	45173548	NA		0.444141	0.254041	-0.1901	-0.306473	2.38753e-30	3.97632e-27	FALSE	.	.
cg02932167	ECEL1	2	233352951	NA	S_Shore	0.61294	0.402071	-0.210868	-0.230637	1.90034e-21	1.12415e-18	FALSE	protein_coding;protein_coding	ENST00000304546.4;ENST00000482346.1
cg02941741	NGEF;NGEF	2	233793921	NA	Island	0.783406	0.532367	-0.251039	-0.326685	3.60607e-28	4.70329e-25	FALSE	protein_coding;protein_coding;protein_coding	ENST00000264051.6;ENST00000373552.7;ENST00000409079.1
cg02971581		1	10895950	TRUE		0.144098	0.0411246	-0.102973	-0.100061	3.87752e-08	2.29816e-06	FALSE	.	.
cg03014934	MIR548F5;NBEA;MAB21L1	13	36050901	NA	S_Shelf	0.351641	0.114775	-0.236866	-0.246677	7.31142e-33	1.58299e-29	FALSE	protein_coding;protein_coding;protein_coding;protein_coding;protein_coding;protein_coding	ENST00000379919.5;ENST00000310336.7;ENST00000379939.5;ENST00000400445.6;ENST00000537702.4;ENST00000629018.1
cg03022921		2	8818497	NA	N_Shore	0.178325	0.102256	-0.0760692	-0.117198	1.09528e-16	3.25515e-14	FALSE	protein_coding;antisense;antisense;antisense;antisense;antisense;antisense	ENST00000234091.7;ENST00000412712.1;ENST00000418957.1;ENST00000421298.1;ENST00000433340.1;ENST00000433592.1;ENST00000455965.4
cg03025830	FGF17	8	21905599	NA	Island	0.578897	0.063974	-0.514923	-0.433069	5.69466e-11	6.41992e-09	FALSE	protein_coding;protein_coding;protein_coding;protein_coding;protein_coding;protein_coding	ENST00000522148.4;ENST00000523300.4;ENST00000359441.3;ENST00000518533.4;ENST00000521709.1;ENST00000524314.1
cg03054277	OBSCN;OBSCN	1	228400217	NA	N_Shore	0.733813	0.316139	-0.417675	-0.321029	1.82109e-17	6.0846e-15	FALSE	protein_coding;protein_coding;protein_coding;protein_coding;protein_coding;protein_coding;protein_coding	ENST00000295012.5;ENST00000337335.5;ENST00000472613.2;ENST00000284548.14;ENST00000366707.7;ENST00000422127.4;ENST00000570156.5
cg03065175		4	155661758	NA	N_Shore	0.924706	0.287824	-0.636882	-0.643105	1.27272e-42	7.9871e-39	FALSE	protein_coding;protein_coding;protein_coding	ENST00000499392.1;ENST00000502525.4;ENST00000507827.4
cg03222066	ABCG4;ABCG4	11	119019384	NA		0.570636	0.344477	-0.226159	-0.277833	1.61327e-16	4.67588e-14	FALSE	protein_coding;protein_coding;protein_coding;protein_coding	ENST00000524604.4;ENST00000615496.3;ENST00000619701.3;ENST00000622721.1
cg03243506	TMC2	20	2517231	NA	S_Shelf	0.762467	0.566012	-0.196455	-0.259521	3.50814e-28	4.58939e-25	FALSE	protein_coding	ENST00000358864.1
cg03318924	C1QL4	12	49728150	NA	Island	0.617643	0.439143	-0.1785	-0.196442	4.72124e-16	1.27535e-13	FALSE	protein_coding	ENST00000334221.4
cg03329539		2	233283329	NA	Island	0.386958	0.175195	-0.211763	-0.260422	1.11629e-24	9.82463e-22	FALSE	unprocessed_pseudogene	ENST00000373592.2
cg03356172	MAB21L1;MIR548F5;NBEA	13	36049380	NA		0.235174	0.0457267	-0.189447	-0.155758	1.682e-24	1.44799e-21	FALSE	protein_coding;protein_coding;protein_coding;protein_coding;protein_coding	ENST00000379919.5;ENST00000310336.7;ENST00000379939.5;ENST00000400445.6;ENST00000629018.1
cg03360992	TRIOBP	22	38093207	TRUE	S_Shore	0.279381	0.0920395	-0.187342	-0.190249	8.92585e-15	1.97701e-12	FALSE	protein_coding;protein_coding;protein_coding;protein_coding	ENST00000455236.3;ENST00000344404.9;ENST00000406386.6;ENST00000492485.4
cg03366850	TRIL	7	28998595	NA	S_Shore	0.524985	0.224849	-0.300136	-0.298648	1.63208e-28	2.23646e-25	FALSE	lincRNA;protein_coding	ENST00000436594.1;ENST00000539664.2
cg03384000	NAGS;PYY	17	42081948	NA	N_Shore	0.236409	0.0823084	-0.154101	-0.163559	3.67658e-27	4.27964e-24	TRUE	protein_coding;protein_coding;protein_coding;protein_coding	ENST00000293404.6;ENST00000589767.1;ENST00000592915.1;ENST00000360085.5
cg03438552	TAP2;TAP2	6	32805548	NA	Island	0.505239	0.845402	0.340163	0.230898	1.02587e-07	5.3669e-06	FALSE	protein_coding;protein_coding;protein_coding;protein_coding	ENST00000374897.2;ENST00000374899.7;ENST00000620123.3;ENST00000452392.2
cg03455765	CADM2;CADM2	3	85011052	NA	Island	0.289419	0.152901	-0.136518	-0.176195	1.07774e-13	1.98673e-11	TRUE	protein_coding;protein_coding	ENST00000383699.6;ENST00000407528.5
cg03485667	ZNRF1	16	75143200	TRUE		0.486569	0.655615	0.169046	0.237513	2.79945e-16	7.83083e-14	FALSE	antisense;protein_coding;protein_coding	ENST00000499110.1;ENST00000335325.7;ENST00000568844.1
cg03492827		7	72838601	NA	S_Shelf	0.367528	0.232213	-0.135316	-0.179367	1.00822e-10	1.08413e-08	FALSE	.	.
cg03500056	ABAT;ABAT;ABAT	16	8814507	NA	Island	0.326831	0.132121	-0.19471	-0.170833	2.22333e-17	7.34658e-15	FALSE	protein_coding;protein_coding;protein_coding;protein_coding;protein_coding;protein_coding;protein_coding;protein_coding;protein_coding;protein_coding;protein_coding;protein_coding	ENST00000268251.11;ENST00000396600.5;ENST00000425191.5;ENST00000561870.4;ENST00000562115.1;ENST00000563992.1;ENST00000564714.4;ENST00000565016.4;ENST00000566590.4;ENST00000567812.4;ENST00000568847.4;ENST00000569156.4
cg03520644	COL11A1;COL11A1;COL11A1;COL11A1	1	103574523	TRUE		0.301439	0.0694706	-0.231969	-0.161613	3.0032e-12	4.29897e-10	FALSE	protein_coding;protein_coding;protein_coding;protein_coding;protein_coding	ENST00000353414.7;ENST00000358392.5;ENST00000370096.6;ENST00000427239.4;ENST00000512756.4
cg03522107		1	16553329	TRUE	N_Shore	0.268649	0.161207	-0.107442	-0.112255	4.34534e-13	7.26771e-11	FALSE	transcribed_unprocessed_pseudogene	ENST00000602586.1
cg03530962		3	58475833	NA		0.680233	0.900536	0.220303	0.126992	7.76182e-15	1.73337e-12	FALSE	.	.
cg03579624		3	75717248	NA	Island	0.356503	0.0975324	-0.25897	-0.204096	9.92068e-25	8.83916e-22	FALSE	processed_pseudogene	ENST00000489078.1
cg03630015	WNT10A	2	219747459	NA	S_Shore	0.736983	0.512953	-0.22403	-0.224982	3.05813e-11	3.62901e-09	FALSE	protein_coding;protein_coding;protein_coding	ENST00000258411.6;ENST00000458582.1;ENST00000483911.1
cg03667083	CRHR2	7	30721010	NA	N_Shore	0.575494	0.421226	-0.154268	-0.155573	1.35918e-14	2.93249e-12	FALSE	protein_coding;protein_coding;protein_coding;protein_coding;protein_coding	ENST00000341843.7;ENST00000348438.7;ENST00000452278.4;ENST00000471646.4;ENST00000506074.5
cg03684807		22	46457384	TRUE	S_Shore	0.71366	0.203912	-0.509749	-0.656967	1.7967e-33	4.29837e-30	FALSE	lincRNA	ENST00000381051.5
cg03704673	GLTPD2;GLTPD2	17	4692287	NA		0.764847	0.29172	-0.473127	-0.446969	2.12676e-25	2.0465e-22	FALSE	protein_coding;TEC	ENST00000331264.7;ENST00000623798.1
cg03771840	TRIM15	6	30140145	TRUE	Island	0.380096	0.0729683	-0.307128	-0.190422	1.70039e-10	1.74976e-08	FALSE	protein_coding;protein_coding;protein_coding	ENST00000376688.2;ENST00000376694.7;ENST00000619857.3
cg03773647	YPEL4	11	57417949	NA	Island	0.651161	0.320307	-0.330854	-0.328792	2.64407e-33	6.12263e-30	FALSE	sense_overlapping;sense_overlapping;sense_overlapping;sense_overlapping;sense_overlapping;protein_coding;protein_coding;protein_coding;protein_coding;protein_coding;protein_coding;protein_coding;protein_coding;protein_coding	ENST00000525988.1;ENST00000526243.1;ENST00000528466.1;ENST00000529908.1;ENST00000530595.1;ENST00000529773.1;ENST00000300022.6;ENST00000524592.1;ENST00000524669.4;ENST00000529776.4;ENST00000531442.1;ENST00000532314.4;ENST00000533025.1;ENST00000534810.1
cg03803541	HOXB-AS3;HOXB-AS3;HOXB6	17	46681401	NA		0.58044	0.0540691	-0.52637	-0.605022	6.28678e-51	1.1836e-46	FALSE	antisense;antisense;antisense;antisense;antisense;protein_coding;protein_coding;protein_coding;protein_coding	ENST00000466037.5;ENST00000467155.5;ENST00000487849.6;ENST00000491264.4;ENST00000494420.1;ENST00000552000.2;ENST00000225648.3;ENST00000484302.3;ENST00000490419.1
cg03808007		17	33167772	TRUE	N_Shelf	0.431591	0.845053	0.413462	0.361582	5.99814e-28	7.63912e-25	FALSE	lincRNA	ENST00000579327.1
cg03845837	HSF4;HSF4	16	67203406	NA	Island	0.675607	0.447946	-0.227661	-0.281839	2.98016e-24	2.51552e-21	FALSE	protein_coding;protein_coding;protein_coding;protein_coding;protein_coding;protein_coding;protein_coding;protein_coding;protein_coding;protein_coding;protein_coding;protein_coding;protein_coding;protein_coding;protein_coding;protein_coding;protein_coding;protein_coding;protein_coding;protein_coding;protein_coding	ENST00000264009.11;ENST00000434833.5;ENST00000517685.4;ENST00000519601.4;ENST00000520304.4;ENST00000520528.1;ENST00000520833.4;ENST00000521314.4;ENST00000521374.4;ENST00000521624.4;ENST00000521916.1;ENST00000522295.4;ENST00000523562.4;ENST00000584272.4;ENST00000268605.10;ENST00000563439.4;ENST00000564053.4;ENST00000564992.1;ENST00000565560.4;ENST00000565645.1;ENST00000568086.1
cg03904291	ABCG4;ABCG4	11	119019361	NA	Island	0.700561	0.425074	-0.275487	-0.289627	1.5873e-17	5.35304e-15	FALSE	protein_coding;protein_coding;protein_coding;protein_coding	ENST00000524604.4;ENST00000615496.3;ENST00000619701.3;ENST00000622721.1
cg03904876		12	54322092	NA	N_Shore	0.290702	0.150495	-0.140207	-0.110552	1.09449e-13	2.01246e-11	FALSE	.	.
cg03923640		16	87174624	NA		0.841199	0.37749	-0.463709	-0.412804	6.59916e-21	3.6495e-18	FALSE	protein_coding	ENST00000562840.1
cg03928546	CCDC105;CCDC105	19	15121591	NA		0.26583	0.141798	-0.124032	-0.139874	2.61486e-15	6.33266e-13	FALSE	protein_coding;protein_coding;protein_coding;protein_coding	ENST00000292574.3;ENST00000430939.5;ENST00000595863.1;ENST00000599636.1
cg03960066	CIART;CIART	1	150255503	NA	Island	0.576543	0.177478	-0.399065	-0.338849	3.39572e-21	1.9737e-18	FALSE	protein_coding;protein_coding;protein_coding;protein_coding;protein_coding;protein_coding;protein_coding	ENST00000290363.5;ENST00000369094.4;ENST00000369095.4;ENST00000417398.4;ENST00000447007.4;ENST00000469255.4;ENST00000497211.1
cg03998792		11	120011770	NA		0.725514	0.558098	-0.167416	-0.232555	1.63895e-19	7.3773e-17	FALSE	protein_coding;protein_coding;protein_coding	ENST00000529040.1;ENST00000529495.1;ENST00000532833.1
cg04042468	BIK	22	43506033	NA		0.396505	0.0736647	-0.322841	-0.278997	8.40548e-17	2.5524e-14	FALSE	protein_coding	ENST00000216115.2
cg04057642	KPNB1	17	45730222	NA		0.774099	0.898655	0.124556	0.111103	5.90359e-10	5.41908e-08	FALSE	protein_coding;protein_coding;protein_coding;protein_coding;protein_coding;protein_coding	ENST00000290158.7;ENST00000535458.5;ENST00000540627.4;ENST00000577875.4;ENST00000577918.4;ENST00000583648.4
cg04079760	ESRP2	16	68269694	NA	N_Shore	0.444531	0.0696763	-0.374855	-0.291693	8.90759e-11	9.69863e-09	FALSE	protein_coding;protein_coding;protein_coding;protein_coding;protein_coding;protein_coding;protein_coding;protein_coding	ENST00000251366.6;ENST00000473183.5;ENST00000562567.5;ENST00000562724.1;ENST00000564382.4;ENST00000564465.1;ENST00000565858.4;ENST00000569964.4
cg04086468	DGKG;DGKG;DGKG	3	185911208	NA	S_Shelf	0.930969	0.694717	-0.236251	-0.227232	1.97744e-13	3.50355e-11	FALSE	protein_coding;protein_coding;protein_coding;protein_coding;protein_coding	ENST00000265022.6;ENST00000344484.7;ENST00000382164.7;ENST00000480809.4;ENST00000490452.4
cg04123409	SDS;SDS	12	113841617	NA	S_Shelf	0.363719	0.599007	0.235288	0.176794	7.89783e-13	1.25778e-10	FALSE	protein_coding;protein_coding;protein_coding;protein_coding;protein_coding;protein_coding	ENST00000257549.7;ENST00000546639.1;ENST00000546785.1;ENST00000547342.1;ENST00000552280.4;ENST00000553112.4
cg04155862	MGLL;MGLL;MGLL	3	127541172	NA		0.150862	0.42849	0.277628	0.325242	9.75011e-19	3.94577e-16	FALSE	protein_coding;protein_coding;protein_coding;protein_coding;protein_coding;protein_coding	ENST00000265052.8;ENST00000398104.4;ENST00000434178.5;ENST00000453507.5;ENST00000479967.4;ENST00000494830.1
cg04157161	GUCY2D	17	7906847	TRUE	Island	0.903377	0.57825	-0.325127	-0.396024	1.13809e-24	9.99618e-22	FALSE	protein_coding	ENST00000254854.4
cg04193160	OBSCN;OBSCN	1	228400419	NA	S_Shelf	0.40603	0.148026	-0.258004	-0.190461	3.65557e-22	2.32784e-19	TRUE	protein_coding;protein_coding;protein_coding;protein_coding;protein_coding;protein_coding;protein_coding	ENST00000295012.5;ENST00000337335.5;ENST00000472613.2;ENST00000284548.14;ENST00000366707.7;ENST00000422127.4;ENST00000570156.5
cg04203508	ATF3	1	212779532	NA		0.16674	0.0674739	-0.0992664	-0.174623	3.74681e-28	4.87218e-25	FALSE	protein_coding;protein_coding	ENST00000366981.7;ENST00000366987.5
cg04218880		1	40388264	NA	Island	0.87064	0.585153	-0.285487	-0.316778	1.53072e-23	1.18873e-20	FALSE	.	.
cg04233669	SLC25A48	5	135173201	NA	S_Shore	0.219537	0.561493	0.341956	0.319278	1.39429e-13	2.5357e-11	FALSE	protein_coding;protein_coding;protein_coding;protein_coding;protein_coding	ENST00000274513.8;ENST00000412661.3;ENST00000425402.4;ENST00000433282.4;ENST00000462340.1
cg04263702	FBXL18	7	5528266	NA	N_Shelf	0.384835	0.147322	-0.237513	-0.225814	3.38121e-22	2.16267e-19	FALSE	protein_coding;protein_coding;protein_coding;protein_coding	ENST00000382368.6;ENST00000415009.4;ENST00000453700.6;ENST00000620087.1
cg04270401		10	102806871	NA	Island	0.826939	0.385493	-0.441446	-0.540712	2.38067e-33	5.54232e-30	FALSE	.	.
cg04273431	GNL1;PRR3;PRR3	6	30523215	NA	Island	0.69285	0.426064	-0.266786	-0.293729	1.12791e-20	5.99268e-18	FALSE	protein_coding;protein_coding;protein_coding	ENST00000376621.6;ENST00000433809.1;ENST00000376560.6
cg04295144	ICAM5	19	10407184	NA	Island	0.52994	0.0446742	-0.485266	-0.367406	1.11178e-30	1.88793e-27	FALSE	protein_coding;protein_coding	ENST00000221980.4;ENST00000586480.1
cg04313735	PLEKHB1;PLEKHB1;PLEKHB1;PLEKHB1	11	73357194	NA	Island	0.470587	0.304777	-0.16581	-0.25769	2.48203e-34	6.75952e-31	FALSE	protein_coding;protein_coding;protein_coding;protein_coding;protein_coding;protein_coding	ENST00000227214.9;ENST00000354190.8;ENST00000398492.7;ENST00000398494.7;ENST00000536527.4;ENST00000543085.4
cg04322363		3	159757071	TRUE	Island	0.136856	0.302867	0.16601	0.218921	2.75552e-25	2.61092e-22	FALSE	antisense	ENST00000497452.4
cg04334496		6	133953605	TRUE	N_Shore	0.342108	0.124046	-0.218061	-0.202939	1.38046e-16	4.02807e-14	FALSE	antisense;antisense;antisense;antisense	ENST00000606292.4;ENST00000606544.4;ENST00000607033.4;ENST00000607573.4
cg04363470	PPFIBP2	11	7597814	NA	N_Shore	0.578156	0.415696	-0.16246	-0.243745	6.52506e-19	2.72466e-16	FALSE	protein_coding;protein_coding;protein_coding;protein_coding;protein_coding;protein_coding;protein_coding;protein_coding	ENST00000299492.7;ENST00000524548.4;ENST00000525597.4;ENST00000527790.4;ENST00000529021.1;ENST00000529575.4;ENST00000532926.4;ENST00000533792.4
cg04364219	SIX2	2	45234140	NA	Island	0.530252	0.323598	-0.206654	-0.308577	4.394e-31	7.76605e-28	FALSE	protein_coding	ENST00000303077.6
cg04367503	NFIX	19	13121571	NA		0.413645	0.0806925	-0.332952	-0.401427	1.69076e-41	9.76176e-38	FALSE	protein_coding;protein_coding;protein_coding;protein_coding	ENST00000397661.5;ENST00000585382.4;ENST00000590027.1;ENST00000592199.4
cg04370442	TEPP;TEPP	16	58019866	NA	N_Shore	0.935207	0.147248	-0.787959	-0.782962	1.40003e-46	1.63848e-42	FALSE	protein_coding;protein_coding;protein_coding;protein_coding	ENST00000290871.8;ENST00000441824.2;ENST00000562915.1;ENST00000569996.4
cg04451175	FGF20	8	16860088	NA	Island	0.533311	0.238049	-0.295262	-0.369502	2.31454e-31	4.21109e-28	FALSE	protein_coding;protein_coding	ENST00000180166.5;ENST00000519941.1
cg04453050	GRM2;GRM2	3	51740896	TRUE	N_Shore	0.433866	0.167541	-0.266325	-0.180584	2.64655e-18	1.00527e-15	FALSE	protein_coding;protein_coding;protein_coding;protein_coding;protein_coding	ENST00000296479.8;ENST00000395052.6;ENST00000419928.1;ENST00000464585.1;ENST00000475478.4
cg04462652	LYPD1;LYPD1	2	133429088	NA		0.156187	0.0767423	-0.079445	-0.0939751	9.54117e-14	1.77699e-11	FALSE	protein_coding;protein_coding;protein_coding	ENST00000345008.6;ENST00000397463.2;ENST00000449209.1
cg04517044	SMARCD3;SMARCD3;SMARCD3	7	150946998	NA	N_Shore	0.589313	0.380199	-0.209113	-0.289748	5.06974e-20	2.44464e-17	FALSE	antisense;protein_coding;protein_coding;protein_coding;protein_coding;protein_coding;protein_coding;protein_coding;protein_coding	ENST00000466775.1;ENST00000262188.11;ENST00000356800.5;ENST00000392811.5;ENST00000469154.4;ENST00000472988.4;ENST00000477169.4;ENST00000485610.4;ENST00000491651.1
cg04566512		22	46457588	TRUE	N_Shore	0.823244	0.165076	-0.658168	-0.82171	3.59118e-33	8.1416e-30	FALSE	lincRNA	ENST00000381051.5
cg04590721		10	102807587	NA	Island	0.281912	0.154214	-0.127698	-0.169769	6.33939e-37	2.26865e-33	FALSE	.	.
cg04600027	MIR9-3HG	15	89922602	TRUE	Island	0.336044	0.20088	-0.135164	-0.0993682	3.11799e-11	3.69296e-09	FALSE	lincRNA;lincRNA;lincRNA;lincRNA;lincRNA;lincRNA;lincRNA;lincRNA;lincRNA	ENST00000536780.5;ENST00000538734.5;ENST00000558692.4;ENST00000558754.4;ENST00000558982.4;ENST00000559235.4;ENST00000560596.4;ENST00000560663.4;ENST00000561327.4
cg04606779	MGARP	4	140201580	NA		0.500346	0.25408	-0.246266	-0.22842	4.34168e-11	4.99778e-09	FALSE	protein_coding;protein_coding	ENST00000398955.1;ENST00000503997.4
cg04611437	SEC31B	10	102279697	TRUE	S_Shelf	0.369443	0.127884	-0.241559	-0.193935	6.58879e-19	2.74333e-16	FALSE	protein_coding;protein_coding;protein_coding;protein_coding;protein_coding;protein_coding;protein_coding;protein_coding;protein_coding;protein_coding	ENST00000527595.4;ENST00000528174.4;ENST00000529568.4;ENST00000533549.1;ENST00000557395.4;ENST00000370345.6;ENST00000462434.4;ENST00000479697.4;ENST00000480905.1;ENST00000482456.5
cg04625615	ITPKA	15	41788368	NA	N_Shore	0.791619	0.442808	-0.348811	-0.377095	2.60424e-39	1.26706e-35	FALSE	protein_coding;protein_coding	ENST00000260386.6;ENST00000425927.4
cg04636402	NRG2;NRG2;NRG2;NRG2	5	139284774	NA		0.539632	0.172171	-0.367461	-0.315298	7.80848e-28	9.68829e-25	FALSE	protein_coding;protein_coding;protein_coding;protein_coding;protein_coding;protein_coding;protein_coding;protein_coding	ENST00000289409.7;ENST00000289422.10;ENST00000340391.6;ENST00000358522.6;ENST00000361474.4;ENST00000378238.5;ENST00000518130.1;ENST00000541337.4
cg04650834		8	49456262	TRUE		0.719145	0.450108	-0.269037	-0.349035	5.34602e-20	2.56644e-17	FALSE	.	.
cg04663194	ACTN3	11	66315239	NA	S_Shore	0.921899	0.723251	-0.198648	-0.249864	6.18755e-24	5.07447e-21	FALSE	protein_coding;protein_coding;protein_coding	ENST00000502692.4;ENST00000511191.1;ENST00000513398.1
cg04678623		5	174862224	TRUE	Island	0.139343	0.0735809	-0.0657625	-0.13187	1.19601e-19	5.45153e-17	FALSE	.	.
cg04689048	PNMA8B	19	46999289	NA		0.308895	0.0485046	-0.26039	-0.240698	2.67702e-37	1.01684e-33	FALSE	antisense;protein_coding;protein_coding;protein_coding	ENST00000377652.4;ENST00000594749.1;ENST00000599531.1;ENST00000602017.4
cg04720348	ARHGEF28	5	72922873	NA	N_Shore	0.826473	0.517519	-0.308954	-0.366189	1.26349e-33	3.1086e-30	FALSE	protein_coding;protein_coding;protein_coding;protein_coding	ENST00000296794.9;ENST00000509848.4;ENST00000513042.5;ENST00000545377.4
cg04723680	SEZ6;SEZ6	17	27312855	TRUE	N_Shore	0.694809	0.510091	-0.184717	-0.214555	4.14669e-19	1.77957e-16	FALSE	protein_coding;protein_coding;protein_coding;protein_coding;protein_coding;protein_coding;protein_coding;protein_coding;protein_coding;protein_coding	ENST00000577182.4;ENST00000578748.5;ENST00000580241.4;ENST00000580383.4;ENST00000583215.4;ENST00000317338.15;ENST00000335960.9;ENST00000360295.12;ENST00000442608.6;ENST00000585644.1
cg04729574	ECE2;ECE2;ECE2;ECE2	3	183993394	TRUE	N_Shore	0.553065	0.420979	-0.132087	-0.180812	5.83125e-26	5.89962e-23	FALSE	protein_coding;protein_coding;protein_coding;protein_coding;protein_coding;protein_coding;protein_coding;protein_coding;protein_coding;protein_coding	ENST00000357474.8;ENST00000359140.7;ENST00000402825.6;ENST00000404464.6;ENST00000422932.4;ENST00000430587.1;ENST00000474750.1;ENST00000488401.4;ENST00000490579.1;ENST00000444495.1
cg04730882	HOXD9	2	176986535	NA	N_Shore	0.347386	0.162821	-0.184566	-0.153287	3.64033e-26	3.77112e-23	FALSE	antisense;protein_coding;protein_coding	ENST00000440016.5;ENST00000249499.7;ENST00000613849.1
cg04742719	SLC12A9;TRIP6	7	100463759	NA	N_Shore	0.421074	0.876302	0.455228	0.459629	8.44002e-14	1.58968e-11	FALSE	protein_coding;protein_coding;protein_coding;protein_coding;protein_coding;protein_coding;protein_coding;protein_coding;protein_coding;protein_coding;protein_coding	ENST00000354161.6;ENST00000467972.4;ENST00000475687.4;ENST00000487651.4;ENST00000200457.7;ENST00000417475.4;ENST00000437505.4;ENST00000476870.4;ENST00000496260.1;ENST00000619988.3;ENST00000629911.1
cg04745384		12	52242468	NA		0.305156	0.140438	-0.164718	-0.149188	5.18014e-23	3.66519e-20	FALSE	lincRNA	ENST00000562996.1
cg04793272	ABCG4;ABCG4	11	119020941	NA		0.466665	0.337051	-0.129615	-0.18168	4.25089e-17	1.34261e-14	FALSE	protein_coding;protein_coding;protein_coding;protein_coding	ENST00000524604.4;ENST00000615496.3;ENST00000619701.3;ENST00000622721.1
cg04797742	SIX3	2	45171097	NA	N_Shore	0.624263	0.498299	-0.125964	-0.132052	3.39549e-08	2.04352e-06	FALSE	protein_coding	ENST00000260653.4
cg04845871		1	207996319	TRUE	S_Shore	0.351032	0.727424	0.376392	0.477283	3.01518e-34	8.01e-31	FALSE	lincRNA;lincRNA	ENST00000487977.1;ENST00000608023.4
cg04876424	RBM24	6	17280551	NA		0.626495	0.403437	-0.223057	-0.251146	6.20433e-26	6.23338e-23	FALSE	protein_coding;protein_coding	ENST00000379052.8;ENST00000509686.4
cg04882213		8	61880392	NA	N_Shelf	0.339417	0.711311	0.371894	0.377221	6.33531e-16	1.67377e-13	FALSE	lincRNA	ENST00000525556.1
cg04908588		1	8229825	TRUE	S_Shore	0.246278	0.627779	0.381501	0.29406	2.63442e-16	7.39142e-14	FALSE	.	.
cg04914013	CAMTA1	1	7763567	NA	Island	0.763577	0.481357	-0.282219	-0.327663	5.18382e-36	1.7135e-32	FALSE	protein_coding	ENST00000303635.10
cg04919519	CDC42BPB	14	103524989	NA		0.178518	0.0823015	-0.0962167	-0.14233	6.72225e-22	4.20644e-19	FALSE	protein_coding	ENST00000361246.5
cg04945945	TMC8;TMC6	17	76129402	NA		0.4964	0.686054	0.189655	0.238132	1.20879e-14	2.62502e-12	FALSE	protein_coding;protein_coding;protein_coding;protein_coding	ENST00000322914.6;ENST00000587480.1;ENST00000318430.8;ENST00000589691.1
cg04959790	NR1H3;NR1H3;NR1H3	11	47278977	TRUE		0.56003	0.733171	0.173141	0.208332	2.68438e-12	3.87849e-10	FALSE	protein_coding;protein_coding;protein_coding;protein_coding;protein_coding;protein_coding;protein_coding;protein_coding;protein_coding;protein_coding;protein_coding;protein_coding;protein_coding;protein_coding;protein_coding;protein_coding;protein_coding;protein_coding;protein_coding;protein_coding;protein_coding;protein_coding;protein_coding;protein_coding;protein_coding;protein_coding;protein_c…	ENST00000395397.6;ENST00000405576.4;ENST00000405853.6;ENST00000407404.4;ENST00000412937.4;ENST00000419652.4;ENST00000420369.4;ENST00000436029.4;ENST00000436778.4;ENST00000437276.1;ENST00000441012.5;ENST00000444396.4;ENST00000449369.4;ENST00000457932.4;ENST00000461778.4;ENST00000467728.4;ENST00000476086.5;ENST00000481020.4;ENST00000481889.5;ENST00000486991.1;ENST00000487913.4;ENST00000495866.4;ENS…
cg04961225		12	91332479	TRUE	Island	0.518463	0.845215	0.326752	0.249792	4.41143e-20	2.15116e-17	FALSE	protein_coding;lincRNA	ENST00000548187.1;ENST00000546725.1
cg05021771	VAX2	2	71129289	NA	Island	0.679407	0.413432	-0.265975	-0.283771	2.01953e-22	1.32901e-19	FALSE	protein_coding	ENST00000234392.2
cg05043557	PITPNM3;PITPNM3	17	6460360	NA	N_Shelf	0.319797	0.201992	-0.117805	-0.123586	2.63458e-14	5.41958e-12	FALSE	protein_coding;protein_coding	ENST00000262483.11;ENST00000421306.6
cg05082527	MIR130A	11	57407842	NA	N_Shore	0.871631	0.565789	-0.305842	-0.318438	2.41878e-34	6.62895e-31	FALSE	sense_overlapping;sense_overlapping;miRNA	ENST00000528466.1;ENST00000530595.1;ENST00000385274.1
cg05162564		5	139491931	NA	S_Shore	0.300574	0.12381	-0.176764	-0.151162	1.31916e-11	1.67809e-09	FALSE	protein_coding;protein_coding	ENST00000502351.1;ENST00000505703.1
cg05189804	CLMP	11	123065246	NA		0.653501	0.52088	-0.132621	-0.233745	2.95864e-25	2.77304e-22	FALSE	protein_coding;antisense	ENST00000448775.3;ENST00000531681.1
cg05298458	TBX1;TBX1;TBX1	22	19749188	NA	Island	0.448723	0.217543	-0.23118	-0.290033	3.81389e-21	2.1845e-18	FALSE	protein_coding;protein_coding;protein_coding;protein_coding;protein_coding	ENST00000329705.10;ENST00000332710.7;ENST00000359500.6;ENST00000475303.1;ENST00000621939.1
cg05331731	PIEZO2	18	11147146	TRUE	N_Shore	0.722499	0.461035	-0.261463	-0.300791	2.35721e-25	2.25323e-22	FALSE	protein_coding;protein_coding;protein_coding;protein_coding;protein_coding	ENST00000302079.9;ENST00000383408.5;ENST00000503781.6;ENST00000580640.4;ENST00000582913.4
cg05356319	NFIX	19	13122449	NA		0.271853	0.127721	-0.144132	-0.158914	8.60692e-28	1.06181e-24	FALSE	protein_coding;protein_coding;protein_coding;protein_coding	ENST00000397661.5;ENST00000585382.4;ENST00000590027.1;ENST00000592199.4
cg05369327		14	95826853	NA	S_Shore	0.385749	0.063451	-0.322298	-0.279919	1.69812e-24	1.45607e-21	FALSE	.	.
cg05374982	SDC3	1	31376412	TRUE	Island	0.623181	0.459615	-0.163565	-0.242451	7.61489e-28	9.47525e-25	FALSE	protein_coding	ENST00000339394.6
cg05384271	CRB3;CRB3	19	6464029	NA		0.578143	0.391925	-0.186218	-0.2178	3.03249e-19	1.32105e-16	FALSE	protein_coding;protein_coding;protein_coding;protein_coding;protein_coding	ENST00000308243.7;ENST00000356762.6;ENST00000598494.4;ENST00000600229.4;ENST00000597307.1
cg05396397	NPPA	1	11908164	TRUE	S_Shore	0.50804	0.775799	0.267759	0.290484	8.30049e-23	5.67814e-20	FALSE	protein_coding;protein_coding;protein_coding	ENST00000376476.1;ENST00000376480.6;ENST00000610706.1
cg05437692	NR3C2;NR3C2	4	149362435	NA	N_Shore	0.389585	0.0789702	-0.310615	-0.314704	1.27743e-10	1.3452e-08	FALSE	protein_coding;protein_coding;protein_coding;protein_coding;protein_coding	ENST00000342437.7;ENST00000344721.7;ENST00000358102.6;ENST00000512865.4;ENST00000625323.1
cg05451210		12	98812695	TRUE		0.384324	0.654524	0.2702	0.308089	3.25169e-17	1.04999e-14	FALSE	snRNA	ENST00000364426.1
cg05478824	ASPSCR1	17	79970135	NA	S_Shore	0.593451	0.236195	-0.357256	-0.446728	2.44232e-55	8.13516e-51	FALSE	protein_coding;protein_coding;protein_coding;protein_coding;protein_coding;protein_coding;protein_coding;protein_coding;protein_coding;protein_coding;protein_coding;protein_coding;protein_coding	ENST00000306729.10;ENST00000306739.7;ENST00000577733.4;ENST00000578236.4;ENST00000578361.4;ENST00000580534.4;ENST00000581608.4;ENST00000582355.5;ENST00000583142.4;ENST00000583693.4;ENST00000583744.1;ENST00000584454.4;ENST00000585274.1
cg05531689	OTOF	2	26729139	NA		0.768726	0.646327	-0.122399	-0.230063	1.55609e-19	7.01159e-17	FALSE	protein_coding;protein_coding	ENST00000272371.5;ENST00000403946.6
cg05563558		12	3445716	TRUE	S_Shore	0.554545	0.292743	-0.261802	-0.363846	1.47924e-26	1.59735e-23	FALSE	.	.
cg05563595	TRIM15	6	30140305	TRUE		0.330927	0.150269	-0.180658	-0.181934	9.0114e-24	7.18618e-21	FALSE	protein_coding;protein_coding;protein_coding	ENST00000376688.2;ENST00000376694.7;ENST00000619857.3
cg05578595		3	186542905	NA		0.440879	0.19754	-0.243339	-0.203104	2.47713e-17	8.10153e-15	FALSE	unprocessed_pseudogene;lincRNA	ENST00000448639.1;ENST00000419745.1
cg05584950	ATOH8	2	86012847	TRUE		0.221378	0.658801	0.437423	0.393643	6.35528e-30	1.01175e-26	FALSE	protein_coding;protein_coding;protein_coding	ENST00000306279.3;ENST00000469442.4;ENST00000489682.1
cg05599158		1	11380423	NA		0.18312	0.134093	-0.049027	-0.089772	5.59128e-17	1.73185e-14	FALSE	.	.
cg05648303	SCOC;SCOC;SCOC;SCOC;SCOC	4	141264393	NA		0.186514	0.766898	0.580384	0.532281	1.55423e-28	2.13654e-25	FALSE	protein_coding;protein_coding;protein_coding;protein_coding;antisense	ENST00000338517.7;ENST00000394203.6;ENST00000394205.6;ENST00000506322.4;ENST00000512692.5
cg05670472	PCDHGA4;PCDHGA11;PCDHGA11;PCDHGA9;PCDHGA1;PCDHGB8P;PCDHGB1;PCDHGB6;PCDHGB3;PCDHGB7;PCDHGA6;PCDHGA8;PCDHGA10;PCDHGA5;PCDHGB4;PCDHGA3;PCDHGA3;PCDHGB2;PCDHGA7;PCDHGB5	5	140805732	NA		0.459696	0.253353	-0.206342	-0.323163	7.83306e-19	3.20895e-16	FALSE	protein_coding;protein_coding;protein_coding;protein_coding;protein_coding;protein_coding;protein_coding;protein_coding;protein_coding;protein_coding;protein_coding;protein_coding;protein_coding;protein_coding;protein_coding;protein_coding;protein_coding;protein_coding;protein_coding;protein_coding;unitary_pseudogene;unitary_pseudogene	ENST00000517417.2;ENST00000398610.2;ENST00000398587.5;ENST00000518882.2;ENST00000394576.2;ENST00000253812.7;ENST00000612467.1;ENST00000571252.2;ENST00000518069.1;ENST00000517434.2;ENST00000518325.1;ENST00000398604.2;ENST00000573521.1;ENST00000523390.1;ENST00000522605.1;ENST00000576222.1;ENST00000519479.1;ENST00000617380.1;ENST00000520790.1;ENST00000398594.3;ENST00000502926.1;ENST00000507007.2
cg05692746	LONRF2	2	100937584	NA		0.632022	0.377182	-0.25484	-0.258998	2.00577e-15	4.93766e-13	FALSE	protein_coding	ENST00000393437.6
cg05699921	NUAK2	1	205286927	TRUE	Island	0.560306	0.80952	0.249214	0.316976	1.1515e-14	2.51446e-12	FALSE	protein_coding	ENST00000367157.3
cg05714552	PRRT1	6	32118295	NA	Island	0.414292	0.0958848	-0.318407	-0.294762	6.32601e-35	1.85086e-31	FALSE	protein_coding;protein_coding;protein_coding;protein_coding;protein_coding;protein_coding	ENST00000211413.8;ENST00000375150.5;ENST00000428778.4;ENST00000467780.4;ENST00000472641.1;ENST00000495191.4
cg05728902	INHBE	12	57849029	TRUE	Island	0.641639	0.582648	-0.0589907	-0.197933	2.1144e-20	1.07866e-17	FALSE	protein_coding;protein_coding;protein_coding;protein_coding	ENST00000266646.2;ENST00000547970.1;ENST00000551553.1;ENST00000553033.1
cg05764839	PRRT1	6	32118298	NA		0.379176	0.0300038	-0.349172	-0.303542	3.78062e-36	1.28904e-32	FALSE	protein_coding;protein_coding;protein_coding;protein_coding;protein_coding;protein_coding	ENST00000211413.8;ENST00000375150.5;ENST00000428778.4;ENST00000467780.4;ENST00000472641.1;ENST00000495191.4
cg05766948		2	136783356	TRUE		0.349631	0.0392597	-0.310371	-0.365433	9.06046e-32	1.72834e-28	FALSE	.	.
cg05840541	TTLL8	22	50482925	NA	N_Shore	0.289258	0.564107	0.274849	0.275694	2.61337e-25	2.48712e-22	TRUE	protein_coding;protein_coding	ENST00000266182.9;ENST00000433387.1
cg05857996	EBF4	20	2675418	TRUE		0.750805	0.0809582	-0.669846	-0.720875	8.63773e-34	2.13731e-30	FALSE	protein_coding;protein_coding;protein_coding;protein_coding;protein_coding;protein_coding;protein_coding	ENST00000342725.8;ENST00000380648.7;ENST00000449079.6;ENST00000469215.1;ENST00000497450.4;ENST00000609451.4;ENST00000609967.4
cg05863637		12	130529650	TRUE		0.71044	0.507182	-0.203258	-0.257916	1.56083e-36	5.45054e-33	FALSE	lincRNA;lincRNA	ENST00000567788.1;ENST00000561864.1
cg05886811	RBM24	6	17280740	NA	Island	0.287081	0.153081	-0.134	-0.181989	1.54712e-23	1.19845e-20	FALSE	protein_coding;protein_coding	ENST00000379052.8;ENST00000509686.4
cg05888755	HOXB-AS3;HOXB-AS3;HOXB6;HOXB6	17	46682319	NA	N_Shore	0.665319	0.263348	-0.401971	-0.643577	7.00038e-33	1.52326e-29	FALSE	antisense;antisense;antisense;antisense;antisense;protein_coding;protein_coding;protein_coding;protein_coding	ENST00000466037.5;ENST00000467155.5;ENST00000487849.6;ENST00000491264.4;ENST00000494420.1;ENST00000552000.2;ENST00000225648.3;ENST00000484302.3;ENST00000490419.1
cg05892030		14	51431710	TRUE	Island	0.393461	0.909483	0.516022	0.349448	9.28905e-17	2.79134e-14	FALSE	.	.
cg05893785	NODAL	10	72201943	TRUE		0.216179	0.10074	-0.115439	-0.142683	1.9048e-20	9.7959e-18	FALSE	protein_coding;protein_coding	ENST00000287139.6;ENST00000414871.1
cg05895618	CSRP3;CSRP3	11	19222395	TRUE	Island	0.314193	0.845591	0.531398	0.495807	1.40053e-22	9.38787e-20	FALSE	protein_coding;protein_coding;antisense	ENST00000265968.6;ENST00000533783.1;ENST00000527978.1
cg05923226	CCDC105	19	15121516	NA	N_Shore	0.527341	0.269946	-0.257395	-0.160759	4.73203e-16	1.27667e-13	FALSE	protein_coding;protein_coding;protein_coding;protein_coding	ENST00000292574.3;ENST00000430939.5;ENST00000595863.1;ENST00000599636.1
cg05923595	AZIN2	1	33547713	TRUE		0.26532	0.0699601	-0.19536	-0.235786	1.59615e-16	4.62934e-14	FALSE	protein_coding;protein_coding;protein_coding;protein_coding;protein_coding;protein_coding;protein_coding;protein_coding;protein_coding;protein_coding;protein_coding;protein_coding;protein_coding;protein_coding;protein_coding;protein_coding;protein_coding;protein_coding	ENST00000548559.1;ENST00000294517.9;ENST00000373440.4;ENST00000373441.1;ENST00000373443.6;ENST00000462920.4;ENST00000471119.4;ENST00000473089.4;ENST00000475935.4;ENST00000477570.4;ENST00000478204.4;ENST00000478635.4;ENST00000481886.4;ENST00000483027.4;ENST00000484656.4;ENST00000492420.4;ENST00000495135.4;ENST00000497710.4
cg05976840	TRADD	16	67189804	NA		0.700018	0.386478	-0.31354	-0.293458	1.08757e-27	1.3379e-24	FALSE	protein_coding;protein_coding;protein_coding;protein_coding;protein_coding	ENST00000345057.7;ENST00000486556.1;ENST00000563348.1;ENST00000566104.1;ENST00000566247.1
cg05985317	PRRT1	6	32118208	NA	Island	0.423714	0.156746	-0.266968	-0.319864	5.8887e-49	8.22553e-45	FALSE	protein_coding;protein_coding;protein_coding;protein_coding;protein_coding	ENST00000211413.8;ENST00000375150.5;ENST00000467780.4;ENST00000472641.1;ENST00000495191.4
cg06035600	MAP3K6	1	27687454	NA	S_Shelf	0.570451	0.248024	-0.322427	-0.321604	7.14397e-13	1.14956e-10	FALSE	protein_coding;protein_coding;protein_coding;protein_coding	ENST00000357582.2;ENST00000374040.6;ENST00000472410.4;ENST00000493901.4
cg06105699	ASPSCR1	17	79971436	NA	Island	0.686277	0.325372	-0.360905	-0.433283	2.08358e-16	5.97107e-14	FALSE	protein_coding;protein_coding;protein_coding;protein_coding;protein_coding;protein_coding;protein_coding;protein_coding;protein_coding;protein_coding;protein_coding;protein_coding;protein_coding	ENST00000306729.10;ENST00000306739.7;ENST00000577733.4;ENST00000578236.4;ENST00000578361.4;ENST00000580534.4;ENST00000581608.4;ENST00000582355.5;ENST00000583142.4;ENST00000583693.4;ENST00000583744.1;ENST00000584454.4;ENST00000585274.1
cg06106428	ARHGAP20	11	110584327	NA	N_Shore	0.66243	0.916463	0.254033	0.176148	3.95375e-05	0.000787762	FALSE	protein_coding;protein_coding;protein_coding;protein_coding	ENST00000260283.7;ENST00000527598.1;ENST00000528829.4;ENST00000533353.4
cg06127885	DUOX1;DUOX1;DUOXA1	15	45421068	TRUE	N_Shelf	0.305713	0.134481	-0.171231	-0.199695	8.53157e-39	3.80858e-35	FALSE	protein_coding;protein_coding;protein_coding;protein_coding;protein_coding;protein_coding;protein_coding;protein_coding;protein_coding;protein_coding;protein_coding;protein_coding;protein_coding;protein_coding;protein_coding	ENST00000321429.7;ENST00000389037.6;ENST00000558322.4;ENST00000561220.5;ENST00000267803.7;ENST00000558326.4;ENST00000558377.4;ENST00000558422.4;ENST00000558851.1;ENST00000558996.4;ENST00000559014.4;ENST00000559226.4;ENST00000559644.4;ENST00000559988.4;ENST00000613425.3
cg06134471	TRIM9;TRIM9	14	51560134	NA	N_Shore	0.80057	0.595285	-0.205285	-0.234936	1.08865e-15	2.78772e-13	FALSE	protein_coding;protein_coding;protein_coding	ENST00000298355.6;ENST00000338969.8;ENST00000360392.4
cg06193043	NPPA	1	11908199	TRUE	Island	0.598193	0.796034	0.197842	0.190161	2.46477e-10	2.45128e-08	FALSE	protein_coding;protein_coding;protein_coding	ENST00000376476.1;ENST00000376480.6;ENST00000610706.1
cg06209491	NT5C1A	1	40138402	NA	N_Shore	0.38657	0.19675	-0.18982	-0.277979	7.92574e-26	7.83558e-23	FALSE	protein_coding	ENST00000235628.1
cg06219995	CLCNKB;CLCNKB	1	16374768	NA		0.411587	0.282838	-0.128749	-0.173722	1.13763e-26	1.25029e-23	FALSE	protein_coding;protein_coding;protein_coding	ENST00000375667.6;ENST00000375679.7;ENST00000619181.3
cg06230839		21	43189892	NA	S_Shore	0.590248	0.373085	-0.217163	-0.213914	3.19284e-13	5.46004e-11	FALSE	.	.
cg06260709		20	48626621	NA	Island	0.513229	0.109912	-0.403317	-0.433644	1.53636e-39	7.73574e-36	FALSE	.	.
cg06276663	SH3PXD2A	10	105579899	TRUE	N_Shelf	0.505921	0.78	0.274079	0.278997	3.09706e-16	8.5747e-14	FALSE	protein_coding;protein_coding	ENST00000355946.5;ENST00000369774.7
cg06299997	COL1A2	7	94023557	NA	Island	0.230326	0.0976541	-0.132672	-0.344923	1.68128e-17	5.6436e-15	FALSE	protein_coding;protein_coding	ENST00000297268.9;ENST00000620463.1
cg06371836	LINC00261	20	22559867	NA	Island	0.372844	0.225272	-0.147571	-0.120448	4.67001e-16	1.26309e-13	FALSE	lincRNA	ENST00000564492.1
cg06388350		4	95334135	TRUE	N_Shore	0.304523	0.700441	0.395918	0.316819	1.56582e-21	9.43013e-19	FALSE	.	.
cg06413398	DDO;DDO	6	110736865	NA		0.379893	0.746467	0.366574	0.29563	1.2032e-13	2.20205e-11	FALSE	protein_coding;protein_coding;protein_coding	ENST00000368923.6;ENST00000368924.6;ENST00000479373.1
cg06443034		17	78417973	TRUE		0.467441	0.200319	-0.267122	-0.300907	9.01527e-22	5.5848e-19	FALSE	.	.
cg06458248	NFIX	19	13117917	TRUE	Island	0.813549	0.545303	-0.268247	-0.318679	2.14795e-28	2.89751e-25	FALSE	protein_coding;protein_coding	ENST00000397661.5;ENST00000592199.4
cg06462666	MOV10L1;MOV10L1;MOV10L1	22	50528312	NA	S_Shore	0.308985	0.180792	-0.128194	-0.257627	4.32848e-17	1.36413e-14	FALSE	protein_coding;protein_coding;protein_coding;protein_coding;protein_coding;protein_coding;protein_coding	ENST00000262794.8;ENST00000395854.5;ENST00000395858.6;ENST00000419054.4;ENST00000475190.1;ENST00000540615.4;ENST00000545383.4
cg06472341	MUC2	11	1073641	TRUE		0.379666	0.691653	0.311987	0.268076	2.90116e-25	2.73098e-22	FALSE	processed_transcript	ENST00000361558.7
cg06478823	ACSM3;ACSM3	16	20774873	TRUE	Island	0.2167	0.733221	0.516521	0.464074	4.05798e-24	3.3857e-21	FALSE	antisense;protein_coding;protein_coding;protein_coding;protein_coding;protein_coding;protein_coding	ENST00000565498.1;ENST00000289416.8;ENST00000440284.5;ENST00000561584.4;ENST00000561795.4;ENST00000564701.1;ENST00000568235.4
cg06543615	GPR39;LYPD1;LYPD1	2	133402475	NA		0.669206	0.567732	-0.101474	-0.286674	2.74354e-22	1.78378e-19	FALSE	protein_coding;protein_coding;protein_coding	ENST00000329321.3;ENST00000470071.1;ENST00000397463.2
cg06563300	SLC17A8;SLC17A8	12	100750811	TRUE		0.271236	0.131449	-0.139786	-0.209655	9.29131e-21	5.01659e-18	FALSE	protein_coding;protein_coding	ENST00000323346.8;ENST00000392989.3
cg06618629	SPNS2	17	4437077	TRUE	Island	0.282065	0.736113	0.454048	0.45599	8.26002e-29	1.16887e-25	FALSE	protein_coding;protein_coding;protein_coding;protein_coding;protein_coding;protein_coding;protein_coding	ENST00000329078.6;ENST00000570641.1;ENST00000571386.1;ENST00000571668.4;ENST00000573106.1;ENST00000573990.1;ENST00000576635.5
cg06618764	AMZ1	7	2719090	NA	Island	0.92286	0.964942	0.0420829	0.162398	2.19914e-14	4.58703e-12	FALSE	protein_coding	ENST00000312371.7
cg06620514		14	74793271	TRUE	N_Shore	0.544506	0.347869	-0.196637	-0.264353	6.48763e-27	7.35408e-24	FALSE	protein_coding	ENST00000557177.1
cg06636831	CLEC3B	3	45077369	TRUE	S_Shore	0.422915	0.104266	-0.31865	-0.321794	6.52766e-26	6.52793e-23	FALSE	protein_coding;protein_coding;protein_coding;protein_coding;snRNA	ENST00000296130.4;ENST00000428034.1;ENST00000490386.1;ENST00000481405.1;ENST00000516601.1
cg06681434	WSCD2	12	108617683	NA	N_Shore	0.43601	0.281335	-0.154675	-0.167054	6.1172e-21	3.40033e-18	FALSE	protein_coding;protein_coding;protein_coding;protein_coding	ENST00000332082.7;ENST00000547525.4;ENST00000549903.1;ENST00000551638.4
cg06688910		8	122466955	TRUE	Island	0.21732	0.876218	0.658898	0.628674	7.2979e-35	2.12089e-31	FALSE	.	.
cg06691520	LGI1;LGI1	10	95517738	NA	Island	0.332371	0.21202	-0.120351	-0.184684	6.90187e-21	3.78308e-18	FALSE	protein_coding;protein_coding;protein_coding;protein_coding;protein_coding;protein_coding;protein_coding;protein_coding;protein_coding	ENST00000371413.4;ENST00000371418.7;ENST00000478763.2;ENST00000627420.1;ENST00000627699.1;ENST00000629035.1;ENST00000630047.1;ENST00000630184.1;ENST00000630487.1
cg06693983	TMEM190	19	55889216	TRUE	N_Shelf	0.825225	0.210331	-0.614894	-0.631629	5.14589e-23	3.6522e-20	FALSE	antisense;protein_coding	ENST00000595064.1;ENST00000291934.3
cg06705930	PAX6;PAX6;PAX6	11	31823191	NA	Island	0.522944	0.30665	-0.216294	-0.190657	1.07975e-21	6.64133e-19	TRUE	protein_coding;protein_coding;protein_coding;protein_coding;protein_coding;protein_coding;protein_coding;protein_coding;protein_coding;protein_coding;protein_coding;protein_coding;protein_coding;protein_coding;protein_coding;protein_coding;protein_coding;protein_coding;protein_coding;protein_coding;protein_coding;protein_coding	ENST00000241001.11;ENST00000379107.5;ENST00000379109.5;ENST00000379111.5;ENST00000379115.7;ENST00000379123.8;ENST00000379129.5;ENST00000379132.6;ENST00000419022.4;ENST00000455099.4;ENST00000464174.4;ENST00000470027.5;ENST00000471303.4;ENST00000481563.4;ENST00000494377.5;ENST00000530373.4;ENST00000530714.4;ENST00000531910.4;ENST00000533333.4;ENST00000534353.4;ENST00000534390.1;ENST00000606377.4
cg06714761		1	201096289	TRUE	N_Shore	0.616294	0.546281	-0.0700128	-0.153666	1.3317e-10	1.39726e-08	FALSE	protein_coding	ENST00000449188.2
cg06744585	NFIX	19	13135808	NA	Island	0.665888	0.0821985	-0.58369	-0.631422	1.78949e-33	4.29837e-30	FALSE	protein_coding;protein_coding;protein_coding;protein_coding;protein_coding;protein_coding;protein_coding;protein_coding;protein_coding;protein_coding;protein_coding;protein_coding;protein_coding	ENST00000358552.6;ENST00000360105.7;ENST00000397661.5;ENST00000585382.4;ENST00000585575.4;ENST00000586797.4;ENST00000586873.1;ENST00000587260.1;ENST00000587760.4;ENST00000588228.4;ENST00000590027.1;ENST00000591028.1;ENST00000592199.4
cg06768010	LBX2-AS1;LBX2	2	74729502	NA	Island	0.375251	0.193004	-0.182246	-0.197654	6.55181e-15	1.48072e-12	FALSE	protein_coding;protein_coding;protein_coding;antisense;antisense	ENST00000341396.2;ENST00000460508.3;ENST00000550249.2;ENST00000548978.2;ENST00000603175.1
cg06783429	SND1	7	127673038	NA	Island	0.816477	0.263477	-0.553	-0.473759	2.01217e-19	8.95484e-17	FALSE	protein_coding;protein_coding;protein_coding;protein_coding;protein_coding;protein_coding	ENST00000476782.4;ENST00000478726.1;ENST00000354725.6;ENST00000470723.4;ENST00000484767.4;ENST00000486037.1
cg06795233	WNT6	2	219737392	TRUE	Island	0.383771	0.217767	-0.166004	-0.188935	9.50059e-15	2.09467e-12	FALSE	protein_coding	ENST00000233948.3
cg06800658		5	134881970	NA	Island	0.287429	0.0797881	-0.207641	-0.22218	1.77626e-32	3.62809e-29	FALSE	.	.
cg06819923	ZP2	16	21214508	NA	N_Shore	0.697371	0.535439	-0.161931	-0.275375	4.55409e-18	1.6726e-15	FALSE	antisense;protein_coding;protein_coding;protein_coding	ENST00000572747.1;ENST00000573114.1;ENST00000574002.1;ENST00000574091.4
cg06825512	APCDD1	18	10453969	NA		0.781879	0.425142	-0.356737	-0.375585	3.84569e-27	4.46449e-24	FALSE	protein_coding;protein_coding;protein_coding;protein_coding	ENST00000355285.8;ENST00000423585.2;ENST00000578882.1;ENST00000582723.1
cg06832853		11	31892855	TRUE		0.195238	0.112342	-0.0828966	-0.117109	2.64573e-20	1.32906e-17	FALSE	protein_coding;protein_coding;protein_coding	ENST00000506388.2;ENST00000530348.4;ENST00000532942.4
cg06856687		20	44934509	NA		0.620816	0.406129	-0.214687	-0.335436	3.87299e-25	3.54561e-22	FALSE	protein_coding	ENST00000537909.2
cg06868100	PRR15	7	29606349	NA	Island	0.278448	0.0726243	-0.205824	-0.26852	8.769e-25	7.84532e-22	FALSE	protein_coding	ENST00000319694.2
cg06872257	FGF20;FGF20	8	16859636	NA	Island	0.433972	0.189782	-0.24419	-0.230938	2.72389e-22	1.77367e-19	FALSE	protein_coding;protein_coding	ENST00000180166.5;ENST00000519941.1
cg06881093	PAX8;PAX8;PAX8;PAX8;PAX8	2	114035983	NA	Island	0.385631	0.162635	-0.222995	-0.275874	1.70341e-15	4.23668e-13	FALSE	protein_coding;protein_coding;protein_coding;protein_coding;protein_coding;protein_coding;protein_coding	ENST00000263334.8;ENST00000263335.10;ENST00000348715.8;ENST00000397647.6;ENST00000429538.6;ENST00000467778.4;ENST00000554830.2
cg06891458	MGA;MGA	15	41951943	NA	N_Shore	0.408924	0.259191	-0.149733	-0.180669	4.76744e-14	9.35382e-12	FALSE	protein_coding;protein_coding;protein_coding;protein_coding;protein_coding	ENST00000219905.10;ENST00000545763.4;ENST00000563576.4;ENST00000566718.4;ENST00000568630.1
cg06893296		6	30095136	NA	S_Shore	0.789304	0.460861	-0.328443	-0.378986	1.10402e-24	9.75633e-22	FALSE	.	.
cg06949673		1	56463319	TRUE	S_Shore	0.369069	0.777228	0.408159	0.255333	3.51335e-13	5.95205e-11	FALSE	.	.
cg06953130	PROSER2	10	11912410	NA	S_Shore	0.765379	0.490035	-0.275344	-0.544349	1.36807e-23	1.06931e-20	TRUE	protein_coding;protein_coding;protein_coding;antisense;antisense	ENST00000277570.8;ENST00000379200.1;ENST00000622831.3;ENST00000445498.4;ENST00000453242.1
cg06964816	ANXA3	4	79472643	NA		0.278393	0.509306	0.230914	0.215091	2.50175e-20	1.26112e-17	FALSE	protein_coding;protein_coding;protein_coding;protein_coding;protein_coding;protein_coding;protein_coding	ENST00000264908.9;ENST00000503570.5;ENST00000510502.1;ENST00000512373.4;ENST00000512542.4;ENST00000512884.4;ENST00000514171.4
cg07010228	JSRP1	19	2253854	NA	S_Shore	0.230001	0.131282	-0.0987198	-0.112993	2.18267e-13	3.84741e-11	FALSE	protein_coding;protein_coding	ENST00000300961.9;ENST00000593238.2
cg07013104	PLEKHB1;PLEKHB1;PLEKHB1;PLEKHB1	11	73357095	NA	Island	0.567315	0.292828	-0.274487	-0.225422	2.05301e-18	7.90917e-16	FALSE	protein_coding;protein_coding;protein_coding;protein_coding	ENST00000227214.9;ENST00000354190.8;ENST00000398492.7;ENST00000536527.4
cg07013148		8	146233339	NA	N_Shore	0.853624	0.323329	-0.530295	-0.485913	7.15717e-24	5.8365e-21	FALSE	.	.
cg07037725	SPRY4;SPRY4	5	141699580	TRUE	N_Shelf	0.714144	0.417697	-0.296447	-0.375574	3.97127e-29	5.75127e-26	FALSE	protein_coding;protein_coding;protein_coding;protein_coding	ENST00000344120.4;ENST00000434127.2;ENST00000503582.1;ENST00000511815.1
cg07038187	MIR9-3HG	15	89922989	NA	S_Shore	0.909067	0.581721	-0.327346	-0.369226	2.06587e-30	3.4539e-27	FALSE	lincRNA;lincRNA;lincRNA;lincRNA;lincRNA;lincRNA;lincRNA;lincRNA;lincRNA	ENST00000536780.5;ENST00000538734.5;ENST00000558692.4;ENST00000558754.4;ENST00000558982.4;ENST00000559235.4;ENST00000560596.4;ENST00000560663.4;ENST00000561327.4
cg07080372	SLC25A22	11	796607	TRUE	Island	0.147474	0.386761	0.239287	0.215553	1.43697e-22	9.6024e-20	FALSE	protein_coding;protein_coding;protein_coding;protein_coding;protein_coding;protein_coding;protein_coding;protein_coding;protein_coding;protein_coding;protein_coding;protein_coding;protein_coding;protein_coding;protein_coding;protein_coding;protein_coding;protein_coding;protein_coding;protein_coding;protein_coding;protein_coding;protein_coding;protein_coding;protein_coding;protein_coding;protein_c…	ENST00000620120.2;ENST00000320230.8;ENST00000456706.5;ENST00000481290.4;ENST00000524891.4;ENST00000525010.4;ENST00000525644.2;ENST00000526152.4;ENST00000527127.4;ENST00000527723.4;ENST00000527734.4;ENST00000528606.4;ENST00000528936.4;ENST00000529066.4;ENST00000529351.4;ENST00000530360.2;ENST00000531214.4;ENST00000531437.4;ENST00000531514.4;ENST00000531534.4;ENST00000532361.4;ENST00000532459.4;ENS…
cg07082267		16	85429035	TRUE	Island	0.476432	0.772413	0.295981	0.230103	4.02236e-23	2.89809e-20	FALSE	.	.
cg07087130	UPP1;UPP1	7	48129797	NA	S_Shore	0.829395	0.486818	-0.342577	-0.430877	3.59421e-22	2.29213e-19	FALSE	protein_coding;protein_coding;protein_coding;protein_coding;protein_coding;protein_coding;protein_coding;protein_coding;protein_coding;protein_coding;protein_coding	ENST00000331803.7;ENST00000395560.6;ENST00000395564.7;ENST00000416681.4;ENST00000417464.5;ENST00000421046.4;ENST00000432131.4;ENST00000436673.4;ENST00000444999.4;ENST00000457596.4;ENST00000482015.4
cg07088882		11	8038043	NA		0.327288	0.161116	-0.166172	-0.215457	6.2773e-22	3.94214e-19	FALSE	antisense	ENST00000534076.1
cg07098722	PRKN;PRKN;PRKN	6	162683881	NA		0.395984	0.174429	-0.221555	-0.18424	1.35884e-15	3.42692e-13	FALSE	protein_coding;protein_coding;protein_coding;protein_coding;protein_coding;protein_coding;protein_coding;protein_coding;protein_coding	ENST00000338468.6;ENST00000366892.4;ENST00000366894.4;ENST00000366896.4;ENST00000366897.4;ENST00000366898.4;ENST00000479615.4;ENST00000612540.1;ENST00000615065.1
cg07102210		14	21101750	NA	S_Shore	0.376156	0.116412	-0.259744	-0.300176	1.26378e-27	1.54151e-24	FALSE	.	.
cg07107113	FBLIM1	1	16087752	NA	N_Shore	0.685902	0.494655	-0.191247	-0.274894	1.24687e-32	2.58333e-29	FALSE	protein_coding;protein_coding;protein_coding;protein_coding;protein_coding;protein_coding;protein_coding;protein_coding;protein_coding;protein_coding;protein_coding	ENST00000375766.6;ENST00000375771.4;ENST00000430076.4;ENST00000431771.5;ENST00000483633.5;ENST00000496928.5;ENST00000502638.4;ENST00000502739.4;ENST00000508310.4;ENST00000510393.4;ENST00000510929.4
cg07167185	LYPLA2	1	24120017	NA	N_Shore	0.453496	0.213037	-0.240459	-0.22633	2.47201e-13	4.31972e-11	FALSE	protein_coding;protein_coding;protein_coding;protein_coding;protein_coding;protein_coding;protein_coding;protein_coding;protein_coding;protein_coding	ENST00000374501.1;ENST00000374502.6;ENST00000374503.6;ENST00000374505.5;ENST00000374514.6;ENST00000420982.4;ENST00000421070.1;ENST00000472213.1;ENST00000492577.1;ENST00000495365.4
cg07202214	LRRC32;LRRC32	11	76381081	NA	N_Shore	0.278453	0.136629	-0.141824	-0.164423	3.23876e-12	4.60875e-10	FALSE	protein_coding;protein_coding;protein_coding;protein_coding	ENST00000260061.8;ENST00000404995.4;ENST00000407242.5;ENST00000421973.1
cg07262247	PDLIM4;PDLIM4	5	131593730	NA	Island	0.93828	0.757438	-0.180842	-0.209662	4.24975e-18	1.56614e-15	FALSE	protein_coding;protein_coding;protein_coding;protein_coding;protein_coding;protein_coding;protein_coding;protein_coding	ENST00000416053.4;ENST00000431054.4;ENST00000439698.4;ENST00000471826.1;ENST00000253754.6;ENST00000379018.6;ENST00000463615.1;ENST00000474421.1
cg07276621		11	10750870	NA	N_Shore	0.888369	0.352016	-0.536352	-0.540444	1.29513e-45	1.27458e-41	FALSE	.	.
cg07278165		6	16948028	TRUE	N_Shore	0.247614	0.573917	0.326303	0.397208	7.95973e-21	4.34094e-18	FALSE	.	.
cg07298299	LARGE2;LARGE2	11	45943237	NA	S_Shore	0.821279	0.59752	-0.223759	-0.29337	8.42598e-27	9.40361e-24	FALSE	protein_coding;protein_coding;protein_coding;protein_coding	ENST00000325468.8;ENST00000401752.4;ENST00000529052.4;ENST00000531526.4
cg07356483	CRTAC1	10	99791663	NA	S_Shelf	0.723635	0.555617	-0.168017	-0.275434	2.58463e-21	1.50632e-18	FALSE	protein_coding;protein_coding	ENST00000370591.5;ENST00000370597.6
cg07387286	ADAM5	8	39172120	NA	S_Shore	0.710221	0.408992	-0.301229	-0.423756	3.62866e-21	2.09503e-18	FALSE	unitary_pseudogene;unitary_pseudogene;unitary_pseudogene;unitary_pseudogene;unitary_pseudogene;unitary_pseudogene;unitary_pseudogene;unitary_pseudogene;unitary_pseudogene	ENST00000359790.8;ENST00000399789.5;ENST00000417441.5;ENST00000433441.5;ENST00000464901.4;ENST00000497773.4;ENST00000505455.4;ENST00000512764.4;ENST00000519063.5
cg07447742	MLNR	13	49793170	NA		0.712635	0.298602	-0.414034	-0.408645	2.06782e-33	4.86631e-30	FALSE	protein_coding	ENST00000218721.1
cg07456081		14	104585948	NA		0.383849	0.235371	-0.148478	-0.197027	1.81286e-21	1.08127e-18	FALSE	.	.
cg07465627	STXBP4	17	53167407	TRUE	N_Shore	0.348992	0.714689	0.365697	0.259138	7.89443e-17	2.40904e-14	FALSE	protein_coding;protein_coding	ENST00000376352.5;ENST00000434978.5
cg07478918	PAX6;PAX6;PAX6	11	31817824	NA		0.325054	0.216275	-0.108779	-0.124906	3.46879e-19	1.50205e-16	FALSE	protein_coding;protein_coding;protein_coding;protein_coding;protein_coding;protein_coding;protein_coding;protein_coding;protein_coding;protein_coding;protein_coding;protein_coding;protein_coding;protein_coding;protein_coding;protein_coding;protein_coding;protein_coding	ENST00000241001.11;ENST00000379107.5;ENST00000379109.5;ENST00000379111.5;ENST00000379115.7;ENST00000379123.8;ENST00000379129.5;ENST00000379132.6;ENST00000419022.4;ENST00000455099.4;ENST00000464174.4;ENST00000470027.5;ENST00000471303.4;ENST00000494377.5;ENST00000530373.4;ENST00000531910.4;ENST00000533333.4;ENST00000606377.4
cg07503630	ECEL1	2	233351564	NA		0.425846	0.0927977	-0.333049	-0.325098	1.74535e-34	4.84466e-31	FALSE	protein_coding;protein_coding;protein_coding	ENST00000304546.4;ENST00000409941.1;ENST00000482346.1
cg07518532		11	1989507	NA		0.386203	0.133048	-0.253155	-0.341639	1.50002e-43	9.99287e-40	FALSE	protein_coding;protein_coding	ENST00000397294.6;ENST00000397297.6
cg07525202	RHBDL3	17	30591850	NA	S_Shore	0.751547	0.400233	-0.351314	-0.383715	2.06388e-28	2.80156e-25	FALSE	protein_coding;protein_coding;protein_coding;protein_coding	ENST00000269051.7;ENST00000431505.5;ENST00000538145.4;ENST00000578006.4
cg07525886		17	8227927	NA		0.366733	0.536615	0.169882	0.106367	2.34352e-05	0.0005158	FALSE	.	.
cg07537370	UCN;UCN	2	27531124	NA	Island	0.661002	0.448399	-0.212602	-0.220966	2.21742e-28	2.98194e-25	FALSE	protein_coding	ENST00000296099.2
cg07539583	PRSS16	6	27215397	NA		0.440364	0.284727	-0.155636	-0.165286	1.29953e-24	1.13452e-21	FALSE	protein_coding;protein_coding;protein_coding;protein_coding;protein_coding;protein_coding;protein_coding;protein_coding	ENST00000230582.6;ENST00000421826.5;ENST00000454665.5;ENST00000466364.2;ENST00000468930.4;ENST00000470870.4;ENST00000475106.2;ENST00000485993.3
cg07541020	ZNF239;ZNF239;ZNF239	10	44068714	TRUE	Island	0.543733	0.858727	0.314993	0.323715	6.02365e-12	8.146e-10	FALSE	protein_coding;protein_coding;protein_coding;protein_coding	ENST00000374446.5;ENST00000426961.1;ENST00000491188.1;ENST00000535642.4
cg07547765	HOXB7	17	46685448	NA	S_Shore	0.609741	0.15669	-0.45305	-0.282963	3.49803e-19	1.5132e-16	FALSE	protein_coding;protein_coding;protein_coding	ENST00000239165.8;ENST00000467314.1;ENST00000567101.2
cg07618085	TBC1D16	17	77924582	NA		0.685959	0.26596	-0.419999	-0.40286	7.20681e-23	4.96133e-20	FALSE	protein_coding;protein_coding;protein_coding;protein_coding;protein_coding;protein_coding;protein_coding;protein_coding;protein_coding	ENST00000310924.5;ENST00000340848.10;ENST00000570373.4;ENST00000571872.1;ENST00000572862.4;ENST00000573782.4;ENST00000574241.5;ENST00000574427.1;ENST00000576768.4
cg07651048		12	49735444	NA	N_Shore	0.808163	0.435192	-0.372971	-0.38242	2.90492e-47	3.69966e-43	FALSE	.	.
cg07663200		17	42030104	TRUE		0.15643	0.0677602	-0.0886698	-0.108936	2.75095e-22	1.78592e-19	FALSE	.	.
cg07691146	FAM124A	13	51797646	NA	Island	0.850949	0.36766	-0.483288	-0.543482	1.26317e-46	1.51937e-42	FALSE	protein_coding;protein_coding;protein_coding;protein_coding;protein_coding	ENST00000280057.6;ENST00000322475.11;ENST00000497449.2;ENST00000614765.3;ENST00000615498.3
cg07700233		4	39171231	NA	Island	0.307987	0.879021	0.571035	0.536381	1.66145e-20	8.59544e-18	FALSE	.	.
cg07710883	CAPN1	11	64972227	TRUE	Island	0.687785	0.413836	-0.273948	-0.219899	3.19134e-18	1.19439e-15	FALSE	protein_coding;protein_coding;protein_coding;protein_coding;protein_coding;protein_coding;protein_coding	ENST00000279247.9;ENST00000524773.4;ENST00000527323.4;ENST00000530495.1;ENST00000533079.4;ENST00000533129.4;ENST00000533820.4
cg07734514	GPX5;GPX5	6	28498759	TRUE	N_Shore	0.407022	0.208054	-0.198969	-0.303476	2.56147e-23	1.91235e-20	FALSE	protein_coding;protein_coding;protein_coding;protein_coding	ENST00000412168.5;ENST00000442674.5;ENST00000469384.1;ENST00000483784.1
cg07739179	NAGS;PYY;PYY	17	42081810	NA	S_Shore	0.308993	0.0520397	-0.256953	-0.252682	3.47826e-39	1.65511e-35	FALSE	protein_coding;protein_coding;protein_coding	ENST00000293404.6;ENST00000589767.1;ENST00000360085.5
cg07749597		5	42840698	TRUE		0.534205	0.901913	0.367708	0.240191	0.00254396	0.0193219	FALSE	protein_coding	ENST00000514218.4
cg07803108	NAGS;PYY	17	42081927	NA	Island	0.230395	0.0579744	-0.17242	-0.162896	4.23121e-32	8.32813e-29	FALSE	protein_coding;protein_coding;protein_coding;protein_coding	ENST00000293404.6;ENST00000589767.1;ENST00000592915.1;ENST00000360085.5
cg07804276	CRYBA2;CRYBA2;CRYBA2	2	219856889	NA	Island	0.166588	0.0857662	-0.0808215	-0.0905842	1.2575e-18	4.99561e-16	FALSE	protein_coding;protein_coding;protein_coding;protein_coding;protein_coding;protein_coding	ENST00000295728.5;ENST00000392096.5;ENST00000453769.1;ENST00000487181.1;ENST00000490678.1;ENST00000496566.4
cg07810039	TGFB2;TGFB2	1	218524558	NA	Island	0.182528	0.65656	0.474032	0.547669	1.07758e-28	1.51497e-25	FALSE	protein_coding;protein_coding;protein_coding	ENST00000366929.4;ENST00000366930.7;ENST00000488793.1
cg07813031		1	61298421	TRUE	Island	0.119304	0.648823	0.529518	0.478028	2.58453e-21	1.50632e-18	FALSE	.	.
cg07908755	COBL	7	51385729	NA	Island	0.312644	0.233648	-0.0789953	-0.106718	6.51976e-16	1.7204e-13	FALSE	protein_coding;protein_coding;protein_coding;protein_coding	ENST00000265136.10;ENST00000395540.5;ENST00000395542.5;ENST00000441453.4
cg07909422	SIRT5;SIRT5	6	13574371	NA		0.0823279	0.0548426	-0.0274852	-0.0475274	1.39361e-14	2.9993e-12	FALSE	protein_coding;protein_coding;protein_coding;protein_coding;protein_coding;protein_coding	ENST00000359782.6;ENST00000379250.8;ENST00000379262.7;ENST00000397350.5;ENST00000606117.1;ENST00000606427.4
cg07914772		4	4577273	TRUE	N_Shore	0.0949435	0.0382275	-0.0567161	-0.1051	1.20652e-10	1.27737e-08	FALSE	antisense;antisense;antisense	ENST00000502693.1;ENST00000512438.4;ENST00000610009.4
cg07939626	DDR1;DDR1	6	30853073	NA		0.645975	0.458697	-0.187277	-0.198328	3.80627e-09	2.89969e-07	FALSE	protein_coding;protein_coding;protein_coding;protein_coding;protein_coding;protein_coding;protein_coding;protein_coding;protein_coding;protein_coding;protein_coding;protein_coding;protein_coding;protein_coding;protein_coding;protein_coding;protein_coding;protein_coding;protein_coding;protein_coding;protein_coding;protein_coding;protein_coding;protein_coding;protein_coding;protein_coding;protein_c…	ENST00000324771.11;ENST00000376568.6;ENST00000376569.6;ENST00000376570.7;ENST00000396342.5;ENST00000412274.5;ENST00000418800.5;ENST00000421124.5;ENST00000428153.5;ENST00000431373.1;ENST00000437124.5;ENST00000452441.4;ENST00000454612.5;ENST00000460944.5;ENST00000482873.5;ENST00000502955.4;ENST00000503180.4;ENST00000503495.4;ENST00000503628.4;ENST00000503670.4;ENST00000504152.4;ENST00000504651.4;EN…
cg08012287	ACTN3	11	66315298	NA	Island	0.717826	0.433904	-0.283923	-0.329503	1.50372e-44	1.14235e-40	FALSE	protein_coding;protein_coding;protein_coding	ENST00000502692.4;ENST00000511191.1;ENST00000513398.1
cg08013793	CAMKV	3	49905354	TRUE		0.293893	0.184476	-0.109417	-0.100326	2.51543e-14	5.20165e-12	FALSE	protein_coding;protein_coding;protein_coding;protein_coding;protein_coding;protein_coding;protein_coding;protein_coding;protein_coding;protein_coding;protein_coding;protein_coding;protein_coding	ENST00000296471.10;ENST00000463537.4;ENST00000466535.4;ENST00000466940.4;ENST00000467248.4;ENST00000475665.4;ENST00000476105.1;ENST00000477224.4;ENST00000479704.4;ENST00000480398.2;ENST00000487726.4;ENST00000488336.4;ENST00000498324.4
cg08119655	PPFIBP2	11	7595925	TRUE		0.585612	0.183385	-0.402227	-0.5582	2.09602e-37	8.10371e-34	FALSE	protein_coding;protein_coding;protein_coding;protein_coding	ENST00000299492.7;ENST00000524548.4;ENST00000527790.4;ENST00000529575.4
cg08123207	PRRT1	6	32118312	NA	Island	0.58632	0.111498	-0.474823	-0.470398	4.18605e-38	1.69405e-34	FALSE	protein_coding;protein_coding;protein_coding;protein_coding;protein_coding;protein_coding	ENST00000211413.8;ENST00000375150.5;ENST00000428778.4;ENST00000467780.4;ENST00000472641.1;ENST00000495191.4
cg08175536	MIR9-3HG	15	89927750	TRUE	S_Shore	0.739315	0.494341	-0.244974	-0.333881	7.70302e-30	1.20417e-26	FALSE	lincRNA;lincRNA;lincRNA;lincRNA;lincRNA;lincRNA;lincRNA;lincRNA;lincRNA;lincRNA	ENST00000536780.5;ENST00000538734.5;ENST00000558692.4;ENST00000558754.4;ENST00000558982.4;ENST00000559235.4;ENST00000560596.4;ENST00000560663.4;ENST00000561037.4;ENST00000561327.4
cg08203886		4	175135604	NA	N_Shore	0.199944	0.121342	-0.078602	-0.0917781	7.19697e-18	2.54817e-15	FALSE	lincRNA	ENST00000515444.4
cg08248579	KIF13A;KIF13A;KIF13A;KIF13A	6	17988937	NA	Island	0.566249	0.872253	0.306004	0.372292	3.57037e-20	1.76086e-17	FALSE	protein_coding;protein_coding;protein_coding;protein_coding;protein_coding;protein_coding	ENST00000259711.9;ENST00000378814.8;ENST00000378826.5;ENST00000378843.5;ENST00000502704.2;ENST00000507576.1
cg08271909		4	155661691	NA	Island	0.889066	0.345493	-0.543573	-0.533072	1.85392e-49	2.97327e-45	FALSE	protein_coding;protein_coding;protein_coding	ENST00000499392.1;ENST00000502525.4;ENST00000507827.4
cg08370173		17	75537444	TRUE	Island	0.72816	0.580772	-0.147388	-0.201531	5.90238e-21	3.28514e-18	FALSE	.	.
cg08404221	FBXO27	19	39523309	NA		0.401208	0.116821	-0.284386	-0.273924	3.42406e-15	8.15108e-13	FALSE	protein_coding;protein_coding;protein_coding;protein_coding;protein_coding;protein_coding	ENST00000292853.7;ENST00000509137.5;ENST00000593847.1;ENST00000594770.4;ENST00000595166.1;ENST00000600828.4
cg08468772	PSD2	5	139174423	NA		0.85877	0.668671	-0.190098	-0.215366	9.21587e-20	4.25895e-17	FALSE	protein_coding	ENST00000274710.3
cg08507952		3	193750969	TRUE	Island	0.23738	0.111163	-0.126217	-0.163232	2.49141e-12	3.62265e-10	FALSE	processed_transcript;processed_transcript;processed_transcript;processed_transcript;processed_transcript;processed_transcript;processed_transcript	ENST00000420947.2;ENST00000449350.5;ENST00000458224.4;ENST00000599441.4;ENST00000625668.1;ENST00000626476.1;ENST00000629795.1
cg08550394	ADCY9	16	4013659	TRUE		0.470276	0.194023	-0.276253	-0.241519	1.95569e-20	1.00219e-17	FALSE	protein_coding;protein_coding	ENST00000294016.6;ENST00000576936.4
cg08577293	DHX58	17	40253614	NA		0.882865	0.608349	-0.274516	-0.275673	1.63116e-18	6.34042e-16	FALSE	protein_coding;protein_coding	ENST00000251642.6;ENST00000589979.1
cg08584759	PROSER2	10	11912126	NA	N_Shore	0.783669	0.448597	-0.335072	-0.617359	2.05251e-26	2.17304e-23	FALSE	protein_coding;protein_coding;protein_coding;antisense;antisense	ENST00000277570.8;ENST00000379200.1;ENST00000622831.3;ENST00000445498.4;ENST00000453242.1
cg08620329		8	67454546	TRUE	N_Shore	0.765383	0.281913	-0.48347	-0.553523	1.94078e-26	2.05978e-23	FALSE	.	.
cg08647039	NFIX	19	13120987	TRUE	Island	0.353456	0.108137	-0.245319	-0.2919	1.08119e-32	2.2727e-29	FALSE	protein_coding;protein_coding	ENST00000397661.5;ENST00000592199.4
cg08688548	CPEB1	15	83317398	NA	N_Shore	0.868314	0.570214	-0.2981	-0.322047	4.42194e-36	1.48432e-32	FALSE	protein_coding;protein_coding;protein_coding;protein_coding;protein_coding;protein_coding;antisense;antisense	ENST00000563519.1;ENST00000566716.1;ENST00000567678.1;ENST00000615198.3;ENST00000617522.3;ENST00000620182.3;ENST00000560650.1;ENST00000618020.1
cg08701183		7	21209781	NA		0.504898	0.210911	-0.293988	-0.331358	1.58656e-21	9.54181e-19	FALSE	.	.
cg08719380	CACNB4;CACNB4;CACNB4;CACNB4	2	152830505	NA	S_Shore	0.580503	0.343893	-0.23661	-0.30438	4.99626e-32	9.78946e-29	FALSE	protein_coding;protein_coding;protein_coding;protein_coding;protein_coding;protein_coding;protein_coding;protein_coding;protein_coding	ENST00000201943.8;ENST00000360283.9;ENST00000397327.5;ENST00000427385.4;ENST00000439467.4;ENST00000470066.1;ENST00000475848.1;ENST00000534999.4;ENST00000539935.4
cg08739828	MOCOS	18	33768144	NA	Island	0.678301	0.459181	-0.21912	-0.250105	4.08347e-25	3.72256e-22	FALSE	protein_coding;antisense	ENST00000261326.5;ENST00000568654.1
cg08753172	INPP5K;INPP5K;INPP5K	17	1401405	TRUE		0.71807	0.198091	-0.519979	-0.601156	3.51244e-23	2.56917e-20	FALSE	protein_coding;protein_coding;protein_coding;protein_coding;protein_coding;protein_coding;protein_coding;protein_coding;protein_coding;protein_coding	ENST00000320345.9;ENST00000350761.8;ENST00000406424.7;ENST00000421807.5;ENST00000449479.4;ENST00000461552.1;ENST00000477115.1;ENST00000481867.1;ENST00000495339.1;ENST00000574561.1
cg08770870	RPH3AL	17	154410	TRUE	S_Shore	0.293319	0.0964667	-0.196852	-0.255299	2.88997e-14	5.90009e-12	FALSE	protein_coding;protein_coding;protein_coding;protein_coding;protein_coding;protein_coding;protein_coding;protein_coding;protein_coding;protein_coding;protein_coding;protein_coding;protein_coding	ENST00000323434.11;ENST00000331302.10;ENST00000536489.5;ENST00000570638.4;ENST00000570954.1;ENST00000573780.4;ENST00000574722.4;ENST00000574953.4;ENST00000575736.4;ENST00000576001.4;ENST00000576420.4;ENST00000577079.4;ENST00000618002.3
cg08818632	OTOP3	17	72931569	NA		0.718464	0.524466	-0.193998	-0.365798	5.41974e-27	6.19047e-24	FALSE	protein_coding;protein_coding;protein_coding	ENST00000626282.1;ENST00000328801.4;ENST00000580749.1
cg08832414	ECE2;ECE2;ECE2;ECE2	3	183993571	TRUE	S_Shore	0.294662	0.183767	-0.110895	-0.191233	5.66443e-31	9.89032e-28	FALSE	protein_coding;protein_coding;protein_coding;protein_coding;protein_coding;protein_coding;protein_coding;protein_coding;protein_coding;protein_coding	ENST00000357474.8;ENST00000359140.7;ENST00000402825.6;ENST00000404464.6;ENST00000422932.4;ENST00000430587.1;ENST00000474750.1;ENST00000488401.4;ENST00000490579.1;ENST00000444495.1
cg08834436		22	27831818	NA	Island	0.38918	0.260339	-0.128841	-0.347991	6.79518e-26	6.76422e-23	FALSE	.	.
cg08847140	HJV;HJV;HJV;HJV	1	145416777	NA		0.414278	0.131359	-0.282919	-0.266158	7.13073e-19	2.94334e-16	FALSE	protein_coding;protein_coding;protein_coding;protein_coding	ENST00000336751.8;ENST00000357836.5;ENST00000475797.1;ENST00000497365.4
cg08871545		1	48559803	NA	Island	0.221777	0.518149	0.296371	0.376562	1.87587e-27	2.26263e-24	FALSE	.	.
cg08889687		3	110789300	NA	N_Shore	0.358761	0.153418	-0.205343	-0.149984	9.96012e-08	5.22841e-06	FALSE	protein_coding;protein_coding;protein_coding;protein_coding;antisense;antisense;antisense;antisense;antisense	ENST00000319792.6;ENST00000461477.4;ENST00000485303.4;ENST00000491525.4;ENST00000463025.1;ENST00000467426.4;ENST00000474769.4;ENST00000476301.4;ENST00000491709.4
cg08894487	ARID3A	19	941243	TRUE	N_Shelf	0.126754	0.809853	0.683099	0.792173	6.79688e-27	7.64461e-24	FALSE	protein_coding;protein_coding;protein_coding	ENST00000263620.6;ENST00000457152.3;ENST00000587532.4
cg08900404	PRR15	7	29605808	NA	S_Shore	0.139928	0.0450846	-0.094843	-0.10432	5.6119e-16	1.49542e-13	FALSE	protein_coding;protein_coding	ENST00000319694.2;ENST00000450427.1
cg08903855		1	37056769	TRUE		0.170606	0.0816426	-0.0889638	-0.142702	5.25474e-18	1.91371e-15	FALSE	.	.
cg08943714	HECA	6	139470282	TRUE	S_Shore	0.331386	0.872349	0.540963	0.352496	2.58784e-12	3.74901e-10	FALSE	protein_coding;antisense;antisense;antisense	ENST00000367658.2;ENST00000586229.4;ENST00000587577.4;ENST00000589192.4
cg08947894		1	155044345	NA		0.726855	0.45309	-0.273764	-0.249545	1.64679e-12	2.47601e-10	FALSE	protein_coding	ENST00000505139.1
cg08948841	CTBP1;CTBP1;CTBP1-DT	4	1244042	NA	S_Shore	0.604852	0.796212	0.19136	0.326473	1.08185e-29	1.66121e-26	FALSE	protein_coding;protein_coding;protein_coding;protein_coding;protein_coding;protein_coding;antisense;antisense;antisense;antisense;antisense	ENST00000290921.9;ENST00000382952.6;ENST00000506180.4;ENST00000514210.4;ENST00000514495.1;ENST00000515399.4;ENST00000357591.2;ENST00000507044.1;ENST00000514984.1;ENST00000578730.1;ENST00000581398.1
cg08951051		16	4993543	TRUE	S_Shelf	0.429716	0.2855	-0.144216	-0.275376	2.52534e-23	1.8919e-20	FALSE	protein_coding	ENST00000592772.1
cg08957484	CCNI2	5	132083532	NA		0.33868	0.0339943	-0.304685	-0.242392	9.71684e-26	9.56265e-23	FALSE	protein_coding;protein_coding	ENST00000378731.4;ENST00000614847.1
cg08961287	MIR9-3HG	15	89919993	NA		0.668186	0.484095	-0.184092	-0.297556	1.86374e-34	5.14034e-31	FALSE	lincRNA;lincRNA;lincRNA;lincRNA;lincRNA;lincRNA;lincRNA;lincRNA	ENST00000536780.5;ENST00000538734.5;ENST00000558692.4;ENST00000559235.4;ENST00000560008.4;ENST00000560596.4;ENST00000560663.4;ENST00000561327.4
cg08976101	ALX4	11	44328423	NA	S_Shore	0.542719	0.323265	-0.219454	-0.21916	1.42135e-15	3.57622e-13	FALSE	protein_coding	ENST00000329255.3
cg08994060	PFKFB3	10	6214026	NA	N_Shore	0.421294	0.740307	0.319013	0.474698	5.24658e-23	3.7001e-20	FALSE	protein_coding;protein_coding	ENST00000379789.7;ENST00000536985.4
cg09029085	IGF2BP1;IGF2BP1	17	47094198	NA	N_Shelf	0.528334	0.851777	0.323443	0.265655	6.54797e-20	3.09879e-17	FALSE	protein_coding;protein_coding;protein_coding;protein_coding	ENST00000290341.6;ENST00000431824.2;ENST00000499130.5;ENST00000515586.4
cg09042411	SAP25;LRCH4	7	100172231	NA	Island	0.730488	0.496286	-0.234203	-0.228865	4.77638e-20	2.31349e-17	FALSE	protein_coding;processed_transcript;protein_coding;protein_coding;protein_coding	ENST00000485554.4;ENST00000485071.2;ENST00000538735.4;ENST00000614631.3;ENST00000622764.1
cg09068286	GFPT2	5	179779115	NA		0.569027	0.351754	-0.217273	-0.227075	1.1321e-19	5.18203e-17	FALSE	protein_coding;protein_coding;protein_coding;protein_coding	ENST00000253778.11;ENST00000503228.1;ENST00000503546.1;ENST00000518158.4
cg09134314	RNF182;RNF182;RNF182;RNF182	6	13924570	NA	N_Shore	0.137435	0.0423867	-0.0950481	-0.13607	1.74212e-21	1.04195e-18	FALSE	protein_coding;protein_coding;protein_coding;protein_coding;protein_coding;protein_coding;protein_coding;protein_coding	ENST00000420478.2;ENST00000423553.5;ENST00000471906.1;ENST00000488300.4;ENST00000488763.4;ENST00000537388.1;ENST00000537663.4;ENST00000544682.4
cg09183151		5	170889300	TRUE	N_Shore	0.869718	0.677357	-0.192362	-0.254086	1.00066e-24	8.89743e-22	FALSE	.	.
cg09202851		11	567966	NA	Island	0.731345	0.444008	-0.287336	-0.257021	4.39228e-23	3.1489e-20	FALSE	lincRNA;lincRNA;lincRNA;lincRNA	ENST00000500447.1;ENST00000528245.1;ENST00000533920.1;ENST00000534540.1
cg09239106	KCNH3	12	49937997	NA		0.70057	0.508133	-0.192438	-0.253595	3.40583e-15	8.1166e-13	FALSE	protein_coding;protein_coding	ENST00000257981.6;ENST00000551415.1
cg09258479	PDZK1IP1	1	47655861	NA	N_Shore	0.239317	0.696942	0.457625	0.393422	1.36363e-44	1.0736e-40	FALSE	protein_coding;protein_coding;protein_coding	ENST00000294338.5;ENST00000371885.1;ENST00000489919.1
cg09278098		12	84902512	TRUE	S_Shore	0.174402	0.513442	0.339041	0.275628	3.87654e-18	1.43226e-15	FALSE	.	.
cg09285095	LINC00899	22	46440394	TRUE	S_Shore	0.119661	0.336751	0.21709	0.208342	6.26737e-17	1.92884e-14	FALSE	processed_transcript;processed_transcript;processed_transcript	ENST00000421538.1;ENST00000444890.1;ENST00000609737.1
cg09360974		11	66496490	NA	S_Shore	0.421773	0.302213	-0.119559	-0.150687	3.51085e-13	5.95015e-11	FALSE	protein_coding;protein_coding	ENST00000527010.1;ENST00000533211.4
cg09373597	FOXL2NB	3	138667775	NA	Island	0.442677	0.233674	-0.209003	-0.30823	4.62072e-39	2.15146e-35	FALSE	protein_coding;protein_coding;protein_coding	ENST00000383165.3;ENST00000470680.4;ENST00000498709.1
cg09470638	CCDC105	19	15121509	NA	N_Shore	0.683816	0.385355	-0.298462	-0.315352	4.89266e-34	1.25362e-30	FALSE	protein_coding;protein_coding;protein_coding;protein_coding	ENST00000292574.3;ENST00000430939.5;ENST00000595863.1;ENST00000599636.1
cg09476130	CFAP45	1	159870086	TRUE		0.634452	0.145282	-0.489171	-0.529682	9.96384e-23	6.75199e-20	FALSE	protein_coding;protein_coding;protein_coding;miRNA	ENST00000368099.7;ENST00000476696.4;ENST00000479940.2;ENST00000584466.1
cg09477019		16	56681945	NA		0.443327	0.162737	-0.280589	-0.232163	4.13949e-10	3.93345e-08	FALSE	protein_coding;transcribed_unprocessed_pseudogene;processed_transcript	ENST00000622334.1;ENST00000567054.1;ENST00000568608.1
cg09490371	ECEL1P2	2	233253024	NA	Island	0.702047	0.152674	-0.549374	-0.614288	2.66196e-37	1.01684e-33	FALSE	transcribed_unprocessed_pseudogene;transcribed_unprocessed_pseudogene	ENST00000461596.1;ENST00000465689.1
cg09496748	ANKRD44	2	198029215	TRUE	Island	0.828097	0.54423	-0.283867	-0.281352	4.79001e-14	9.3896e-12	FALSE	protein_coding;protein_coding;protein_coding;protein_coding;protein_coding;protein_coding;protein_coding	ENST00000282272.11;ENST00000328737.5;ENST00000409153.4;ENST00000409919.4;ENST00000443014.1;ENST00000447713.1;ENST00000463879.1
cg09563216	CIART;CIART	1	150255241	NA		0.624924	0.145353	-0.479571	-0.359783	2.36384e-16	6.70762e-14	FALSE	protein_coding;protein_coding;protein_coding;protein_coding;protein_coding;protein_coding;protein_coding	ENST00000290363.5;ENST00000369094.4;ENST00000369095.4;ENST00000417398.4;ENST00000447007.4;ENST00000469255.4;ENST00000497211.1
cg09624551		3	72128386	TRUE		0.350695	0.787175	0.43648	0.311568	1.69509e-10	1.74513e-08	FALSE	lincRNA;lincRNA;lincRNA;lincRNA;lincRNA;lincRNA;lincRNA;lincRNA	ENST00000464271.1;ENST00000468646.5;ENST00000469218.4;ENST00000470712.1;ENST00000481148.4;ENST00000498432.4;ENST00000608654.4;ENST00000626474.1
cg09693106	PRR34;PRR34-AS1	22	46449821	NA	S_Shore	0.19471	0.654098	0.459387	0.485086	1.86548e-23	1.41717e-20	FALSE	lincRNA;protein_coding;antisense;antisense;antisense	ENST00000381051.5;ENST00000396008.2;ENST00000416202.4;ENST00000445441.1;ENST00000451166.4
cg09720117	KCNA5	12	5152546	NA	Island	0.568728	0.396247	-0.172481	-0.275944	4.24051e-27	4.89658e-24	FALSE	protein_coding	ENST00000252321.4
cg09735851		15	40615289	NA	S_Shore	0.405954	0.240529	-0.165425	-0.17529	1.34225e-26	1.46338e-23	FALSE	.	.
cg09772299		2	136783103	TRUE	Island	0.555197	0.300156	-0.255041	-0.242295	3.53483e-18	1.31161e-15	FALSE	.	.
cg09781827	URAD	13	28553805	NA	N_Shore	0.397764	0.126473	-0.271292	-0.48571	1.2663e-29	1.91056e-26	FALSE	protein_coding	ENST00000332715.5
cg09784886	KRTAP5-11	11	71293996	NA	N_Shore	0.393798	0.186639	-0.207159	-0.306788	6.72047e-28	8.45955e-25	FALSE	protein_coding;protein_coding;protein_coding;protein_coding	ENST00000398530.1;ENST00000526239.1;ENST00000616086.1;ENST00000617152.1
cg09795979	SYT13	11	45308098	NA		0.812545	0.583674	-0.228872	-0.256799	1.53184e-23	1.18873e-20	FALSE	protein_coding;protein_coding;protein_coding	ENST00000020926.6;ENST00000528101.1;ENST00000533332.1
cg09809672	EDARADD;EDARADD;EDARADD	1	236557682	NA	S_Shore	0.552382	0.87508	0.322698	0.264272	1.98006e-17	6.5802e-15	FALSE	protein_coding;protein_coding;protein_coding	ENST00000334232.7;ENST00000359362.5;ENST00000439430.4
cg09816693	VSX2	14	74706113	NA		0.374387	0.220272	-0.154115	-0.143643	1.60402e-24	1.38914e-21	FALSE	protein_coding	ENST00000261980.2
cg09856367		3	134124508	NA	Island	0.543671	0.440491	-0.10318	-0.265376	6.04483e-20	2.87324e-17	FALSE	.	.
cg09879253		17	45935359	TRUE	S_Shelf	0.803392	0.42969	-0.373702	-0.410887	2.06196e-27	2.46648e-24	FALSE	.	.
cg09884635	CCNI2	5	132084068	NA		0.862629	0.484932	-0.377696	-0.387783	2.06857e-24	1.76672e-21	FALSE	protein_coding;protein_coding;protein_coding	ENST00000378731.4;ENST00000492179.1;ENST00000614847.1
cg09916174	CALD1;CALD1;CALD1;CALD1;CALD1	7	134576049	TRUE	S_Shore	0.614014	0.430379	-0.183635	-0.356632	8.70894e-19	3.54429e-16	FALSE	protein_coding;protein_coding;protein_coding;protein_coding;protein_coding;protein_coding;protein_coding;protein_coding;protein_coding;protein_coding;protein_coding;protein_coding;protein_coding;protein_coding;protein_coding	ENST00000361675.5;ENST00000361901.5;ENST00000393118.5;ENST00000417172.4;ENST00000422748.4;ENST00000424922.4;ENST00000430085.4;ENST00000435928.1;ENST00000436461.5;ENST00000443197.4;ENST00000445569.5;ENST00000454108.4;ENST00000482470.4;ENST00000489019.5;ENST00000495522.1
cg09932758	B4GALNT1	12	58022542	NA		0.638039	0.337208	-0.300831	-0.272912	7.95769e-35	2.282e-31	FALSE	protein_coding;protein_coding;protein_coding;protein_coding;protein_coding;protein_coding;protein_coding;protein_coding	ENST00000341156.7;ENST00000418555.5;ENST00000449184.6;ENST00000547741.1;ENST00000549391.4;ENST00000552468.1;ENST00000552798.4;ENST00000553142.4
cg09978533		22	46465160	NA	Island	0.38061	0.836241	0.455631	0.476053	1.61645e-08	1.05367e-06	FALSE	lincRNA;lincRNA	ENST00000381051.5;ENST00000412643.1
cg09983216	HOXB-AS3;HOXB-AS3;HOXB6	17	46679715	NA	Island	0.525177	0.235145	-0.290033	-0.290236	5.02514e-22	3.16736e-19	FALSE	antisense;antisense;antisense;antisense;antisense;protein_coding;protein_coding;protein_coding;protein_coding	ENST00000466037.5;ENST00000467155.5;ENST00000487849.6;ENST00000491264.4;ENST00000494420.1;ENST00000552000.2;ENST00000225648.3;ENST00000484302.3;ENST00000490419.1
cg09986680		19	39737861	TRUE		0.513774	0.234957	-0.278817	-0.242262	3.97684e-23	2.87007e-20	FALSE	polymorphic_pseudogene;polymorphic_pseudogene;polymorphic_pseudogene	ENST00000606380.1;ENST00000610963.1;ENST00000616270.3
cg09991306	SNED1	2	241975140	TRUE	N_Shelf	0.692027	0.0473891	-0.644638	-0.596069	2.53535e-18	9.65569e-16	FALSE	antisense;protein_coding;protein_coding;protein_coding;protein_coding;protein_coding	ENST00000458377.1;ENST00000310397.11;ENST00000401644.5;ENST00000401884.4;ENST00000405547.6;ENST00000493358.1
cg10006442	DIDO1;DIDO1	20	61518970	TRUE	Island	0.719776	0.885852	0.166076	0.189784	6.86667e-13	1.10906e-10	FALSE	protein_coding;protein_coding;protein_coding	ENST00000266070.7;ENST00000395340.4;ENST00000395343.4
cg10040131	SFXN5	2	73178866	TRUE	S_Shore	0.658742	0.28791	-0.370832	-0.411255	7.68989e-19	3.15627e-16	FALSE	protein_coding;protein_coding;protein_coding;protein_coding;protein_coding;protein_coding;protein_coding;protein_coding	ENST00000272433.5;ENST00000410065.4;ENST00000411783.4;ENST00000461352.4;ENST00000474528.4;ENST00000482289.4;ENST00000490056.4;ENST00000495208.4
cg10099601	TRIL	7	28998577	NA	Island	0.672724	0.402144	-0.27058	-0.257639	4.53808e-21	2.58903e-18	FALSE	lincRNA;protein_coding	ENST00000436594.1;ENST00000539664.2
cg10213875	UPP1;UPP1	7	48129814	NA	S_Shelf	0.858981	0.254725	-0.604256	-0.629699	2.0788e-32	4.22609e-29	FALSE	protein_coding;protein_coding;protein_coding;protein_coding;protein_coding;protein_coding;protein_coding;protein_coding;protein_coding;protein_coding;protein_coding	ENST00000331803.7;ENST00000395560.6;ENST00000395564.7;ENST00000416681.4;ENST00000417464.5;ENST00000421046.4;ENST00000432131.4;ENST00000436673.4;ENST00000444999.4;ENST00000457596.4;ENST00000482015.4
cg10237252	TOM1L1	17	52977213	NA	Island	0.542569	0.362688	-0.179881	-0.221295	3.94397e-23	2.85587e-20	TRUE	protein_coding;protein_coding;protein_coding;protein_coding;protein_coding;protein_coding;protein_coding;protein_coding;protein_coding;protein_coding;protein_coding;protein_coding;protein_coding;protein_coding;protein_coding;protein_coding;protein_coding;protein_coding	ENST00000348161.7;ENST00000445275.5;ENST00000536554.4;ENST00000570371.4;ENST00000570499.4;ENST00000570965.4;ENST00000571319.4;ENST00000572158.4;ENST00000572298.4;ENST00000572360.4;ENST00000572405.4;ENST00000572576.4;ENST00000573607.4;ENST00000574744.1;ENST00000575333.4;ENST00000575882.4;ENST00000575909.1;ENST00000576932.4
cg10242763	CACNA2D1	7	82073690	NA	Island	0.205939	0.111394	-0.0945441	-0.102012	2.40759e-17	7.88601e-15	FALSE	protein_coding;protein_coding;protein_coding	ENST00000356253.8;ENST00000356860.6;ENST00000423588.1
cg10265365	TMEM145	19	42827690	NA	Island	0.743987	0.484523	-0.259463	-0.275338	1.47738e-19	6.66387e-17	FALSE	protein_coding	ENST00000301204.6
cg10274022	PLD3;PLD3	19	40871697	NA	Island	0.29397	0.0701593	-0.223811	-0.209845	1.13903e-14	2.48974e-12	FALSE	protein_coding;protein_coding;protein_coding;protein_coding;protein_coding;protein_coding;protein_coding;protein_coding;protein_coding;protein_coding;protein_coding;protein_coding;protein_coding;protein_coding;protein_coding;protein_coding;protein_coding;protein_coding;protein_coding	ENST00000356508.8;ENST00000359274.5;ENST00000392032.5;ENST00000409281.4;ENST00000409419.4;ENST00000409587.4;ENST00000409735.7;ENST00000464586.1;ENST00000485448.1;ENST00000492243.1;ENST00000493006.1;ENST00000594085.4;ENST00000594908.4;ENST00000596682.4;ENST00000598962.4;ENST00000599685.4;ENST00000600479.4;ENST00000600948.4;ENST00000602131.4
cg10327428	ADAM5	8	39172022	NA	N_Shore	0.458489	0.266199	-0.19229	-0.298803	1.9155e-20	9.8392e-18	FALSE	unitary_pseudogene;unitary_pseudogene;unitary_pseudogene;unitary_pseudogene;unitary_pseudogene;unitary_pseudogene;unitary_pseudogene;unitary_pseudogene;unitary_pseudogene	ENST00000359790.8;ENST00000399789.5;ENST00000417441.5;ENST00000433441.5;ENST00000464901.4;ENST00000497773.4;ENST00000505455.4;ENST00000512764.4;ENST00000519063.5
cg10338787	OTOP3	17	72931767	NA		0.239425	0.0484472	-0.190978	-0.213135	7.88343e-30	1.22794e-26	TRUE	protein_coding;protein_coding;protein_coding	ENST00000626282.1;ENST00000328801.4;ENST00000580749.1
cg10368049	COL1A2	7	94023796	NA	N_Shore	0.287189	0.11442	-0.172768	-0.217341	1.18369e-29	1.80478e-26	FALSE	protein_coding;protein_coding	ENST00000297268.9;ENST00000620463.1
cg10397819		14	75447512	TRUE		0.690462	0.441088	-0.249374	-0.257598	2.96386e-34	7.92226e-31	FALSE	.	.
cg10422709		15	53083978	TRUE	N_Shore	0.650183	0.293512	-0.356671	-0.389653	5.8209e-48	7.63804e-44	FALSE	protein_coding	ENST00000561401.3
cg10426893	SMPD3	16	68482821	NA	N_Shore	0.208592	0.134705	-0.0738868	-0.108595	7.54101e-15	1.68754e-12	FALSE	lincRNA;protein_coding;protein_coding;protein_coding	ENST00000619354.1;ENST00000219334.8;ENST00000561749.1;ENST00000566723.1
cg10476085	FGF1;FGF1;FGF1;FGF1;FGF1;FGF1;FGF1	5	142065737	TRUE	N_Shore	0.47609	0.690559	0.214469	0.129292	1.0092e-11	1.31469e-09	FALSE	protein_coding;protein_coding;protein_coding;protein_coding;protein_coding;protein_coding;protein_coding;protein_coding;protein_coding;protein_coding;protein_coding;protein_coding;protein_coding	ENST00000337706.5;ENST00000360966.8;ENST00000378046.4;ENST00000407758.4;ENST00000411960.1;ENST00000419524.5;ENST00000441680.5;ENST00000489937.4;ENST00000494344.4;ENST00000494579.1;ENST00000612258.3;ENST00000619447.3;ENST00000621536.3
cg10493186	PRDM16;PRDM16	1	3134756	NA	S_Shore	0.420822	0.858849	0.438027	0.398256	7.73663e-26	7.66614e-23	FALSE	protein_coding;protein_coding;protein_coding;protein_coding	ENST00000270722.8;ENST00000378391.5;ENST00000511072.4;ENST00000514189.4
cg10585661	FAM131A;FAM131A	3	184056618	NA		0.529903	0.280996	-0.248907	-0.241043	4.3827e-26	4.47592e-23	FALSE	protein_coding;protein_coding;protein_coding;protein_coding;protein_coding;protein_coding;protein_coding;protein_coding;protein_coding	ENST00000444495.1;ENST00000340957.8;ENST00000383847.5;ENST00000418281.4;ENST00000418768.4;ENST00000433578.4;ENST00000450976.4;ENST00000453072.4;ENST00000497070.1
cg10587183	MAB21L1;MIR548F5;NBEA;MAB21L1	13	36048892	NA	Island	0.40143	0.116157	-0.285273	-0.271238	1.27776e-17	4.3635e-15	FALSE	protein_coding;protein_coding;protein_coding;protein_coding;protein_coding	ENST00000379919.5;ENST00000310336.7;ENST00000379939.5;ENST00000400445.6;ENST00000629018.1
cg10587449		17	2654874	NA	N_Shore	0.790209	0.525966	-0.264243	-0.384661	8.15921e-46	8.41211e-42	FALSE	.	.
cg10619398		20	47937607	NA	N_Shore	0.605189	0.355732	-0.249457	-0.355705	1.26212e-28	1.76297e-25	FALSE	.	.
cg10668414		20	34895979	NA	S_Shelf	0.489305	0.358239	-0.131066	-0.157174	4.76229e-19	2.0257e-16	FALSE	protein_coding;protein_coding	ENST00000339266.8;ENST00000373913.6
cg10686304		8	22561205	TRUE	S_Shore	0.319733	0.110003	-0.20973	-0.238299	5.21425e-14	1.0166e-11	FALSE	processed_transcript	ENST00000523627.1
cg10708761	TMEM178A;TMEM178A	2	39892612	NA	Island	0.191293	0.0956924	-0.095601	-0.105134	1.25636e-18	4.99561e-16	FALSE	protein_coding;protein_coding;protein_coding;protein_coding	ENST00000281961.2;ENST00000437068.4;ENST00000482239.4;ENST00000618232.1
cg10723431		14	66460413	TRUE	N_Shore	0.365294	0.673578	0.308284	0.232037	2.79161e-13	4.83141e-11	FALSE	lincRNA	ENST00000554907.1
cg10738368	LBX2;LBX2-AS1	2	74729551	NA		0.29505	0.150824	-0.144226	-0.124636	4.64738e-08	2.69867e-06	FALSE	protein_coding;protein_coding;protein_coding;antisense;antisense	ENST00000341396.2;ENST00000460508.3;ENST00000550249.2;ENST00000548978.2;ENST00000603175.1
cg10767662	NFIX	19	13127729	NA		0.822438	0.193385	-0.629053	-0.709001	1.05948e-52	2.69867e-48	FALSE	protein_coding;protein_coding;protein_coding;protein_coding	ENST00000397661.5;ENST00000585382.4;ENST00000590027.1;ENST00000592199.4
cg10815657	PLPP2;PLPP2;PLPP2	19	289902	TRUE	N_Shore	0.822323	0.246472	-0.575851	-0.702387	6.55274e-29	9.36454e-26	FALSE	protein_coding;protein_coding;protein_coding;protein_coding;protein_coding;protein_coding	ENST00000269812.6;ENST00000327790.6;ENST00000434325.5;ENST00000589672.1;ENST00000591572.2;ENST00000621795.1
cg10852096		15	79043040	NA		0.473901	0.365726	-0.108175	-0.191062	9.32098e-16	2.40677e-13	FALSE	transcribed_unprocessed_pseudogene;unprocessed_pseudogene	ENST00000434914.1;ENST00000621828.1
cg10891482	MS4A8;MS4A8	11	60467228	NA	N_Shore	0.447762	0.730428	0.282666	0.154278	2.33017e-11	2.82477e-09	FALSE	protein_coding;protein_coding;protein_coding;protein_coding;protein_coding;protein_coding;protein_coding;protein_coding;protein_coding	ENST00000300226.5;ENST00000450141.2;ENST00000525458.1;ENST00000529752.4;ENST00000532816.1;ENST00000532953.4;ENST00000533354.4;ENST00000533691.4;ENST00000534316.1
cg10905180	OR51E2	11	4701824	NA	Island	0.0954516	0.607122	0.511671	0.516176	2.87112e-25	2.71451e-22	FALSE	protein_coding	ENST00000396950.3
cg10906729	HOXB-AS3;HOXB-AS3;HOXB6	17	46682390	NA	N_Shore	0.732923	0.214427	-0.518496	-0.730213	9.79249e-27	1.08448e-23	FALSE	antisense;antisense;antisense;antisense;antisense;protein_coding;protein_coding;protein_coding;protein_coding	ENST00000466037.5;ENST00000467155.5;ENST00000487849.6;ENST00000491264.4;ENST00000494420.1;ENST00000552000.2;ENST00000225648.3;ENST00000484302.3;ENST00000490419.1
cg10946295		2	119913307	TRUE		0.14613	0.079637	-0.0664927	-0.0656638	1.33826e-12	2.03902e-10	FALSE	.	.
cg10990997	MOCS1;MOCS1;MOCS1;MOCS1;MOCS1	6	39873526	NA	N_Shore	0.517249	0.641802	0.124552	0.14864	5.83823e-17	1.80576e-14	FALSE	protein_coding;protein_coding;protein_coding;protein_coding;protein_coding	ENST00000340692.8;ENST00000373181.7;ENST00000373186.7;ENST00000373188.5;ENST00000373195.6
cg11007075	PEBP4	8	22722124	NA	N_Shore	0.518196	0.289582	-0.228614	-0.205294	1.62185e-21	9.74053e-19	FALSE	protein_coding;protein_coding	ENST00000256404.7;ENST00000521284.1
cg11025974	CACNB4;CACNB4;CACNB4;CACNB4	2	152830521	NA	N_Shore	0.469883	0.24417	-0.225713	-0.28159	7.26999e-31	1.2542e-27	FALSE	protein_coding;protein_coding;protein_coding;protein_coding;protein_coding;protein_coding;protein_coding;protein_coding;protein_coding	ENST00000201943.8;ENST00000360283.9;ENST00000397327.5;ENST00000427385.4;ENST00000439467.4;ENST00000470066.1;ENST00000475848.1;ENST00000534999.4;ENST00000539935.4
cg11041817	HOXB7	17	46685327	NA	S_Shelf	0.648634	0.0957832	-0.552851	-0.453933	1.71115e-31	3.16648e-28	FALSE	protein_coding;protein_coding;protein_coding	ENST00000239165.8;ENST00000467314.1;ENST00000567101.2
cg11053062	RNF182;RNF182;RNF182;RNF182	6	13924544	NA	N_Shore	0.141352	0.0396231	-0.101729	-0.159084	1.07911e-20	5.75462e-18	FALSE	protein_coding;protein_coding;protein_coding;protein_coding;protein_coding;protein_coding;protein_coding;protein_coding	ENST00000420478.2;ENST00000423553.5;ENST00000471906.1;ENST00000488300.4;ENST00000488763.4;ENST00000537388.1;ENST00000537663.4;ENST00000544682.4
cg11067714	PURA	5	139492230	NA	S_Shore	0.760782	0.4832	-0.277582	-0.334198	1.6547e-23	1.27268e-20	FALSE	protein_coding;protein_coding;protein_coding	ENST00000331327.4;ENST00000502351.1;ENST00000505703.1
cg11106117		5	139491230	NA		0.46623	0.122601	-0.343629	-0.330262	6.54293e-10	5.9359e-08	FALSE	protein_coding;protein_coding	ENST00000502351.1;ENST00000505703.1
cg11124652		2	62462782	TRUE		0.62397	0.878121	0.25415	0.233742	2.16365e-22	1.4217e-19	FALSE	.	.
cg11127915	NFIX	19	13122381	NA	N_Shelf	0.231754	0.0804674	-0.151286	-0.192215	7.23524e-28	9.02879e-25	FALSE	protein_coding;protein_coding;protein_coding;protein_coding	ENST00000397661.5;ENST00000585382.4;ENST00000590027.1;ENST00000592199.4
cg11152347	FOXL2NB	3	138669434	NA	Island	0.306693	0.208376	-0.0983162	-0.116646	7.04571e-15	1.58489e-12	FALSE	protein_coding;protein_coding;protein_coding	ENST00000383165.3;ENST00000470680.4;ENST00000498709.1
cg11155924	SHANK2;SHANK2	11	70449258	TRUE	N_Shore	0.204951	0.786116	0.581165	0.566266	4.32852e-35	1.31072e-31	FALSE	TEC;protein_coding;protein_coding;protein_coding;protein_coding;protein_coding;protein_coding;protein_coding;protein_coding;protein_coding;protein_coding;protein_coding	ENST00000624018.1;ENST00000338508.7;ENST00000357171.6;ENST00000409161.4;ENST00000409530.4;ENST00000412252.4;ENST00000423696.5;ENST00000426687.2;ENST00000445654.2;ENST00000449116.5;ENST00000449833.5;ENST00000601538.4
cg11177833	GLTPD2	17	4692377	NA	Island	0.404538	0.171085	-0.233452	-0.18661	2.25194e-14	4.6949e-12	FALSE	protein_coding;TEC	ENST00000331264.7;ENST00000623798.1
cg11194994	PEA15	1	160175974	NA		0.242776	0.475109	0.232333	0.219947	1.09705e-17	3.78823e-15	TRUE	protein_coding;protein_coding;protein_coding;antisense	ENST00000360472.7;ENST00000368076.1;ENST00000368077.4;ENST00000418602.1
cg11196848	FGF20	8	16859833	NA	S_Shore	0.642928	0.357956	-0.284972	-0.38025	3.73922e-25	3.4304e-22	FALSE	protein_coding;protein_coding	ENST00000180166.5;ENST00000519941.1
cg11199014	LRFN1	19	39798563	TRUE		0.861594	0.326148	-0.535447	-0.526416	7.38179e-39	3.32963e-35	TRUE	protein_coding	ENST00000248668.4
cg11199639	ADAM5	8	39172111	NA	N_Shore	0.707141	0.339672	-0.367469	-0.442365	6.7122e-21	3.69784e-18	FALSE	unitary_pseudogene;unitary_pseudogene;unitary_pseudogene;unitary_pseudogene;unitary_pseudogene;unitary_pseudogene;unitary_pseudogene;unitary_pseudogene;unitary_pseudogene	ENST00000359790.8;ENST00000399789.5;ENST00000417441.5;ENST00000433441.5;ENST00000464901.4;ENST00000497773.4;ENST00000505455.4;ENST00000512764.4;ENST00000519063.5
cg11275487	GDNF;GDNF;GDNF	5	37836119	NA		0.624705	0.452428	-0.172276	-0.227032	1.20357e-17	4.14282e-15	FALSE	protein_coding;protein_coding;protein_coding;protein_coding;protein_coding;protein_coding;protein_coding;protein_coding	ENST00000326524.5;ENST00000344622.7;ENST00000381826.7;ENST00000427982.4;ENST00000502572.1;ENST00000510177.4;ENST00000515058.4;ENST00000620847.1
cg11351709		8	829623	NA	S_Shore	0.563154	0.817144	0.25399	0.250045	2.32677e-15	5.68265e-13	FALSE	antisense;antisense	ENST00000522092.4;ENST00000577187.4
cg11387340	RPS6KA2;RPS6KA2	6	166970727	NA	S_Shore	0.341601	0.805802	0.464201	0.442716	1.82309e-23	1.3874e-20	FALSE	protein_coding;protein_coding;protein_coding;protein_coding;protein_coding;protein_coding;protein_coding;protein_coding	ENST00000265678.7;ENST00000503859.4;ENST00000506565.1;ENST00000507350.4;ENST00000507371.4;ENST00000510118.4;ENST00000511034.1;ENST00000512860.4
cg11402505	FBXO27	19	39523436	NA	N_Shore	0.268968	0.078469	-0.190499	-0.247694	6.73047e-24	5.50929e-21	FALSE	protein_coding;protein_coding;protein_coding;protein_coding;protein_coding;protein_coding	ENST00000292853.7;ENST00000509137.5;ENST00000593847.1;ENST00000594770.4;ENST00000595166.1;ENST00000600828.4
cg11485465		5	54518469	NA	Island	0.647827	0.466666	-0.181161	-0.156804	5.44533e-12	7.42888e-10	FALSE	protein_coding;protein_coding;protein_coding	ENST00000513312.1;ENST00000513468.4;ENST00000515336.1
cg11512608	PLEKHB1;PLEKHB1;PLEKHB1;PLEKHB1;PLEKHB1;PLEKHB1	11	73357276	NA	Island	0.885847	0.656265	-0.229582	-0.21595	5.64118e-13	9.23529e-11	FALSE	protein_coding;protein_coding;protein_coding;protein_coding;protein_coding;protein_coding;protein_coding;protein_coding;protein_coding;protein_coding;protein_coding;protein_coding;protein_coding;protein_coding	ENST00000227214.9;ENST00000354190.8;ENST00000398492.7;ENST00000398494.7;ENST00000535582.4;ENST00000536527.4;ENST00000538227.4;ENST00000539157.4;ENST00000541760.1;ENST00000543085.4;ENST00000543524.4;ENST00000544532.4;ENST00000545798.4;ENST00000546251.4
cg11540997	DUOX2;DUOXA2	15	45407818	TRUE		0.541128	0.351522	-0.189607	-0.288828	5.20564e-52	1.18639e-47	FALSE	protein_coding;protein_coding;protein_coding;protein_coding;protein_coding	ENST00000389039.9;ENST00000603300.1;ENST00000323030.5;ENST00000350243.9;ENST00000491993.2
cg11573518	CLIP2;CLIP2	7	73721031	TRUE		0.43958	0.790209	0.350629	0.336386	1.74382e-23	1.33411e-20	FALSE	protein_coding;protein_coding	ENST00000223398.9;ENST00000361545.8
cg11585805		1	47973566	NA	Island	0.415417	0.198186	-0.217231	-0.26431	2.81149e-34	7.58597e-31	FALSE	.	.
cg11604426	RHBDL3	17	30592406	NA	Island	0.432265	0.104379	-0.327886	-0.337969	1.19411e-37	4.65831e-34	FALSE	protein_coding;protein_coding;protein_coding;protein_coding	ENST00000269051.7;ENST00000431505.5;ENST00000538145.4;ENST00000578006.4
cg11613559	INPP5F;INPP5F	10	121577971	NA	Island	0.858785	0.610018	-0.248768	-0.275901	1.37017e-20	7.16014e-18	FALSE	protein_coding;protein_coding;protein_coding	ENST00000361976.5;ENST00000369080.3;ENST00000490818.1
cg11617964	PRRT1	6	32118399	NA		0.594765	0.107408	-0.487357	-0.521123	3.03843e-47	3.75913e-43	FALSE	protein_coding;protein_coding;protein_coding;protein_coding;protein_coding;protein_coding	ENST00000211413.8;ENST00000375150.5;ENST00000428778.4;ENST00000467780.4;ENST00000472641.1;ENST00000495191.4
cg11630206	MAP6;MAP6	11	75378272	NA	N_Shore	0.189428	0.11128	-0.0781488	-0.057448	1.42692e-07	7.14026e-06	FALSE	protein_coding;protein_coding;protein_coding	ENST00000304771.6;ENST00000434603.2;ENST00000526740.3
cg11640079		4	4876815	NA	S_Shore	0.429338	0.289344	-0.139994	-0.212202	7.66785e-24	6.2062e-21	FALSE	.	.
cg11672277	MAPRE2	18	32556104	NA	N_Shore	0.771443	0.540616	-0.230826	-0.277092	8.99968e-14	1.68411e-11	FALSE	protein_coding;protein_coding;protein_coding;protein_coding;protein_coding	ENST00000413393.4;ENST00000587359.4;ENST00000589180.4;ENST00000590793.4;ENST00000591734.4
cg11688949	STMN4	8	27115956	NA		0.501655	0.182038	-0.319618	-0.367266	5.83602e-37	2.12361e-33	FALSE	protein_coding;protein_coding;protein_coding;protein_coding;protein_coding;protein_coding;protein_coding	ENST00000265770.10;ENST00000350889.7;ENST00000519614.4;ENST00000519997.4;ENST00000522750.1;ENST00000522908.1;ENST00000523048.4
cg11701022	IGF2-AS;INS-IGF2;IGF2;IGF2-AS;IGF2	11	2162478	NA	Island	0.22701	0.143446	-0.083564	-0.102931	2.57136e-16	7.23956e-14	FALSE	protein_coding;protein_coding;protein_coding;antisense;antisense;antisense;protein_coding	ENST00000300632.8;ENST00000381389.4;ENST00000434045.5;ENST00000381361.4;ENST00000381363.4;ENST00000445504.2;ENST00000356578.7
cg11743675	CNTN1;CNTN1	12	41221855	NA		0.667911	0.182594	-0.485317	-0.535072	3.37164e-37	1.24785e-33	FALSE	protein_coding;protein_coding;protein_coding;protein_coding;protein_coding;protein_coding;protein_coding	ENST00000547702.4;ENST00000547849.4;ENST00000548005.4;ENST00000551295.5;ENST00000551424.4;ENST00000552248.4;ENST00000552913.4
cg11785154	SYT2	1	202679993	TRUE	N_Shelf	0.789073	0.508927	-0.280146	-0.259535	3.49615e-20	1.72833e-17	FALSE	protein_coding	ENST00000367268.4
cg11787522	STRA6;STRA6;STRA6;STRA6;STRA6;STRA6	15	74495109	NA	Island	0.362076	0.129561	-0.232515	-0.252154	1.68074e-14	3.56236e-12	FALSE	antisense;antisense;antisense;protein_coding;protein_coding;protein_coding;protein_coding;protein_coding;protein_coding;protein_coding;protein_coding;protein_coding;protein_coding;protein_coding;protein_coding;protein_coding;protein_coding;protein_coding;protein_coding;protein_coding;protein_coding	ENST00000558645.4;ENST00000560148.4;ENST00000561332.1;ENST00000323940.8;ENST00000395105.7;ENST00000416286.6;ENST00000423167.5;ENST00000432245.5;ENST00000449139.5;ENST00000535552.4;ENST00000563965.4;ENST00000569936.4;ENST00000571341.1;ENST00000573214.4;ENST00000573391.1;ENST00000573456.4;ENST00000573724.1;ENST00000574278.4;ENST00000574439.4;ENST00000574570.1;ENST00000616000.3
cg11794215		17	35423816	TRUE	N_Shore	0.645406	0.44175	-0.203656	-0.193025	8.51916e-13	1.35126e-10	FALSE	.	.
cg11830800	CNTN1;CNTN1	12	41087520	NA	S_Shelf	0.500219	0.140352	-0.359866	-0.501684	3.18037e-37	1.18721e-33	FALSE	protein_coding;protein_coding;protein_coding	ENST00000547702.4;ENST00000551295.5;ENST00000551424.4
cg11871991	CPEB1;CPEB1;CPEB1;CPEB1	15	83240213	TRUE	Island	0.592096	0.359514	-0.232582	-0.289965	1.17842e-35	3.69766e-32	FALSE	protein_coding;protein_coding;protein_coding;protein_coding;protein_coding;protein_coding;protein_coding;protein_coding;protein_coding;protein_coding;protein_coding;protein_coding;protein_coding;protein_coding;protein_coding	ENST00000567678.1;ENST00000568994.1;ENST00000569257.4;ENST00000570205.1;ENST00000611031.3;ENST00000611163.3;ENST00000614918.3;ENST00000614977.3;ENST00000615198.3;ENST00000616959.3;ENST00000617462.3;ENST00000617522.3;ENST00000617958.3;ENST00000618449.3;ENST00000620182.3
cg11921539		11	116328665	TRUE	S_Shore	0.480068	0.325791	-0.154278	-0.151961	2.52679e-20	1.27226e-17	FALSE	.	.
cg11932158	PLCH1	3	155422129	TRUE	S_Shore	0.291666	0.733755	0.442089	0.49337	3.09022e-30	5.10733e-27	FALSE	protein_coding;protein_coding	ENST00000334686.6;ENST00000460012.4
cg11949335	TTC22	1	55247408	NA	Island	0.931059	0.378245	-0.552814	-0.590507	3.4861e-50	5.80594e-46	FALSE	protein_coding;protein_coding	ENST00000371276.7;ENST00000488771.1
cg11959399	SLC52A3	20	741723	NA		0.355899	0.0831143	-0.272785	-0.264778	1.12588e-17	3.88158e-15	FALSE	protein_coding;protein_coding;protein_coding	ENST00000217254.10;ENST00000381944.3;ENST00000473664.1
cg11968804		1	212688447	TRUE	N_Shore	0.30034	0.082519	-0.217821	-0.16494	5.38168e-23	3.77693e-20	TRUE	.	.
cg11985480	LBX2-AS1;LBX2	2	74729100	NA		0.813447	0.309726	-0.503721	-0.616294	3.99774e-33	9.01611e-30	FALSE	protein_coding;protein_coding;protein_coding;antisense;antisense;antisense	ENST00000341396.2;ENST00000460508.3;ENST00000550249.2;ENST00000548978.2;ENST00000603175.1;ENST00000606287.1
cg12006375	GUCY1B2	13	51640315	NA	N_Shore	0.366513	0.639843	0.27333	0.278633	3.44424e-16	9.4633e-14	FALSE	unitary_pseudogene;unitary_pseudogene;unitary_pseudogene;unitary_pseudogene	ENST00000389600.5;ENST00000493639.5;ENST00000532104.1;ENST00000533288.4
cg12036735		8	20169916	TRUE	Island	0.168446	0.789149	0.620703	0.618712	7.7626e-44	5.42152e-40	FALSE	.	.
cg12063847		6	158184542	TRUE		0.340834	0.641809	0.300974	0.365049	3.60798e-15	8.55597e-13	FALSE	protein_coding;protein_coding	ENST00000614703.3;ENST00000614800.3
cg12080906	NES	1	156646065	NA	N_Shore	0.712057	0.412879	-0.299178	-0.422285	5.49139e-45	4.57283e-41	FALSE	protein_coding	ENST00000368223.3
cg12089490		17	234536	NA	Island	0.238911	0.094539	-0.144372	-0.139165	1.827e-14	3.85725e-12	FALSE	protein_coding;protein_coding	ENST00000573780.4;ENST00000575130.4
cg12103951		10	88162314	NA	N_Shore	0.630292	0.281404	-0.348888	-0.423386	5.11134e-23	3.63432e-20	FALSE	.	.
cg12109823		8	67454595	TRUE	S_Shore	0.741342	0.293829	-0.447513	-0.481752	3.95702e-23	2.86053e-20	FALSE	.	.
cg12207153		1	38519255	TRUE		0.703109	0.321803	-0.381306	-0.436097	5.91578e-33	1.30696e-29	FALSE	lincRNA;lincRNA	ENST00000428151.1;ENST00000432922.4
cg12210255		7	72838671	NA		0.277568	0.120007	-0.15756	-0.183551	1.59845e-10	1.65153e-08	FALSE	.	.
cg12210618	MCOLN3	1	85515536	NA	N_Shelf	0.41812	0.220219	-0.1979	-0.172582	1.35669e-14	2.93003e-12	FALSE	protein_coding;protein_coding;protein_coding;protein_coding;protein_coding	ENST00000341115.7;ENST00000370587.4;ENST00000370589.5;ENST00000490600.5;ENST00000370596.4
cg12212198		13	114302021	NA	S_Shore	0.44186	0.949251	0.507391	0.432911	1.77013e-06	6.15266e-05	FALSE	.	.
cg12231340	KRT81	12	52685221	NA	N_Shore	0.806994	0.559516	-0.247478	-0.313693	1.07458e-21	6.61895e-19	FALSE	protein_coding;protein_coding;protein_coding;protein_coding	ENST00000327741.8;ENST00000615839.1;ENST00000423955.5;ENST00000553310.5
cg12233487	TMC2	20	2517085	NA	S_Shore	0.689423	0.437644	-0.251779	-0.338611	2.25312e-28	3.01123e-25	FALSE	protein_coding	ENST00000358864.1
cg12301696		11	2235010	TRUE		0.253619	0.0789911	-0.174627	-0.234362	1.30821e-25	1.27874e-22	FALSE	.	.
cg12320039	PRRT1	6	32118204	NA		0.313378	0.10481	-0.208568	-0.184701	9.80109e-23	6.65211e-20	FALSE	protein_coding;protein_coding;protein_coding;protein_coding;protein_coding	ENST00000211413.8;ENST00000375150.5;ENST00000467780.4;ENST00000472641.1;ENST00000495191.4
cg12324970	PITX3	10	104000446	NA		0.448449	0.186943	-0.261505	-0.250572	4.34057e-20	2.11939e-17	FALSE	protein_coding	ENST00000370002.6
cg12337525		4	81185228	NA	N_Shore	0.203532	0.0532026	-0.15033	-0.128492	4.18117e-18	1.54218e-15	FALSE	.	.
cg12349832	HID1	17	72951240	NA	S_Shore	0.42856	0.264994	-0.163566	-0.197099	6.58942e-25	5.90754e-22	FALSE	protein_coding;protein_coding;protein_coding;protein_coding	ENST00000425042.5;ENST00000532395.4;ENST00000534480.4;ENST00000578002.1
cg12364131	MIR9-3HG	15	89922792	TRUE	Island	0.327023	0.128711	-0.198312	-0.177621	2.35227e-17	7.72233e-15	FALSE	lincRNA;lincRNA;lincRNA;lincRNA;lincRNA;lincRNA;lincRNA;lincRNA;lincRNA	ENST00000536780.5;ENST00000538734.5;ENST00000558692.4;ENST00000558754.4;ENST00000558982.4;ENST00000559235.4;ENST00000560596.4;ENST00000560663.4;ENST00000561327.4
cg12374579	ASPSCR1	17	79970313	NA	N_Shore	0.871458	0.522339	-0.349119	-0.370123	2.97908e-18	1.12076e-15	FALSE	protein_coding;protein_coding;protein_coding;protein_coding;protein_coding;protein_coding;protein_coding;protein_coding;protein_coding;protein_coding;protein_coding;protein_coding;protein_coding	ENST00000306729.10;ENST00000306739.7;ENST00000577733.4;ENST00000578236.4;ENST00000578361.4;ENST00000580534.4;ENST00000581608.4;ENST00000582355.5;ENST00000583142.4;ENST00000583693.4;ENST00000583744.1;ENST00000584454.4;ENST00000585274.1
cg12423733	MAS1L	6	29454623	NA	N_Shelf	0.292703	0.845807	0.553104	0.326655	3.42654e-14	6.89798e-12	FALSE	protein_coding	ENST00000377127.4
cg12453539	LRRN4	20	6033866	TRUE	Island	0.330401	0.170784	-0.159617	-0.266619	9.02148e-33	1.93389e-29	FALSE	protein_coding	ENST00000378858.4
cg12468238	IRX1	5	3598319	NA	N_Shore	0.747944	0.494609	-0.253335	-0.409381	6.01099e-26	6.05318e-23	FALSE	antisense;protein_coding	ENST00000559410.1;ENST00000302006.3
cg12499872	TEPP;TEPP	16	58019893	NA	S_Shore	0.859052	0.280956	-0.578095	-0.56162	1.92743e-44	1.4146e-40	FALSE	protein_coding;protein_coding;protein_coding;protein_coding	ENST00000290871.8;ENST00000441824.2;ENST00000562915.1;ENST00000569996.4
cg12530994	AKR1C3	10	5136782	TRUE		0.0660103	0.732096	0.666086	0.653469	4.75437e-29	6.83962e-26	FALSE	protein_coding;protein_coding;protein_coding;protein_coding;protein_coding;protein_coding;protein_coding;protein_coding;protein_coding;protein_coding;protein_coding;snoRNA	ENST00000434459.5;ENST00000407674.4;ENST00000380554.4;ENST00000439082.5;ENST00000470862.5;ENST00000480697.5;ENST00000480822.4;ENST00000602997.4;ENST00000605149.4;ENST00000605322.1;ENST00000605781.4;ENST00000459536.1
cg12538435	AGAP3;AGAP3	7	150801757	NA	S_Shelf	0.621598	0.828167	0.206568	0.205978	7.69071e-21	4.20482e-18	FALSE	protein_coding;protein_coding;protein_coding;protein_coding;protein_coding;protein_coding;protein_coding;protein_coding	ENST00000397238.5;ENST00000463381.4;ENST00000469901.4;ENST00000473312.4;ENST00000476375.4;ENST00000479901.4;ENST00000490097.4;ENST00000622464.3
cg12577010	TMEM140	7	134832544	TRUE	Island	0.0875755	0.404766	0.317191	0.305469	2.08137e-24	1.77067e-21	FALSE	protein_coding;protein_coding;protein_coding;protein_coding;protein_coding	ENST00000435976.5;ENST00000459937.4;ENST00000464070.1;ENST00000275767.3;ENST00000466307.1
cg12590005	MAPK14;MAPK14;MAPK14;MAPK14	6	35997326	NA	S_Shore	0.110959	0.0586945	-0.0522643	-0.102117	4.27587e-19	1.8332e-16	FALSE	protein_coding;protein_coding;protein_coding;protein_coding;protein_coding;protein_coding;protein_coding;protein_coding;protein_coding	ENST00000229794.7;ENST00000229795.6;ENST00000310795.7;ENST00000468133.4;ENST00000472333.1;ENST00000474429.4;ENST00000491957.4;ENST00000496250.4;ENST00000622903.3
cg12602851	IMPG1	6	76644222	NA	Island	0.672365	0.398727	-0.273638	-0.346182	5.50505e-32	1.06896e-28	FALSE	protein_coding;protein_coding;protein_coding	ENST00000369950.6;ENST00000369952.3;ENST00000611179.3
cg12613020		5	134881662	NA		0.376258	0.12585	-0.250407	-0.278996	1.04254e-18	4.19944e-16	FALSE	.	.
cg12622182	POU3F1	1	38513641	NA	Island	0.469481	0.204385	-0.265096	-0.261835	1.50082e-29	2.23327e-26	FALSE	protein_coding;lincRNA;lincRNA	ENST00000373012.3;ENST00000428151.1;ENST00000432922.4
cg12628061		1	56453730	TRUE		0.414093	0.907343	0.49325	0.377934	1.15943e-12	1.78986e-10	FALSE	.	.
cg12634306	HEYL	1	40098811	TRUE		0.700598	0.0592937	-0.641304	-0.495685	7.46808e-33	1.60886e-29	FALSE	protein_coding;antisense	ENST00000372852.3;ENST00000424418.1
cg12646820	RNF182;RNF182;RNF182;RNF182	6	13924406	NA	S_Shore	0.746646	0.335709	-0.410936	-0.463775	1.03099e-34	2.91789e-31	FALSE	protein_coding;protein_coding;protein_coding;protein_coding;protein_coding;protein_coding;protein_coding;protein_coding	ENST00000420478.2;ENST00000423553.5;ENST00000471906.1;ENST00000488300.4;ENST00000488763.4;ENST00000537388.1;ENST00000537663.4;ENST00000544682.4
cg12654412		16	71459826	NA	Island	0.469064	0.161455	-0.307609	-0.357914	2.54262e-38	1.07941e-34	FALSE	lincRNA	ENST00000567469.1
cg12695707	CCDC105	19	15121333	NA	S_Shelf	0.648281	0.416011	-0.23227	-0.26046	6.04501e-19	2.52664e-16	FALSE	protein_coding;protein_coding;protein_coding;protein_coding	ENST00000292574.3;ENST00000430939.5;ENST00000595863.1;ENST00000599636.1
cg12731671	LRRN4	20	6033516	TRUE	S_Shelf	0.290854	0.116711	-0.174143	-0.178212	2.75406e-29	4.04257e-26	FALSE	protein_coding	ENST00000378858.4
cg12751521		12	109711293	NA	Island	0.489582	0.143946	-0.345635	-0.326256	4.09946e-19	1.7628e-16	FALSE	.	.
cg12800962		20	48626437	NA	N_Shelf	0.652938	0.381064	-0.271874	-0.289764	2.10828e-26	2.22665e-23	FALSE	.	.
cg12810084	HOXA11-AS;HOXA11	7	27225319	NA	S_Shore	0.175847	0.0910965	-0.0847505	-0.112222	1.30518e-15	3.30314e-13	FALSE	protein_coding;protein_coding;antisense;antisense;antisense;antisense;misc_RNA;misc_RNA;misc_RNA	ENST00000006015.3;ENST00000517402.1;ENST00000520360.4;ENST00000520395.1;ENST00000522674.1;ENST00000522863.1;ENST00000615604.1;ENST00000613383.1;ENST00000620901.1
cg12828729		5	134823969	TRUE		0.452563	0.260533	-0.19203	-0.202321	8.28294e-22	5.15325e-19	FALSE	.	.
cg12854483	CNN1;CNN1	19	11649671	TRUE	Island	0.314149	0.107048	-0.207102	-0.259249	8.29868e-21	4.5201e-18	FALSE	protein_coding;protein_coding;protein_coding;protein_coding;protein_coding;protein_coding	ENST00000252456.5;ENST00000535659.5;ENST00000585869.1;ENST00000586059.4;ENST00000588468.1;ENST00000592923.4
cg12860635		6	30095140	NA		0.841597	0.550316	-0.291281	-0.347451	9.16213e-24	7.29295e-21	FALSE	.	.
cg12863565	EBF2	8	25902558	TRUE	Island	0.684614	0.401667	-0.282946	-0.320873	3.3699e-19	1.46362e-16	FALSE	protein_coding;protein_coding	ENST00000517825.1;ENST00000520164.4
cg12883767	SLC26A10	12	58013109	NA		0.498252	0.264329	-0.233923	-0.210586	2.23556e-18	8.57766e-16	FALSE	antisense;antisense;antisense;protein_coding;protein_coding;protein_coding;protein_coding	ENST00000356672.3;ENST00000444467.2;ENST00000593846.1;ENST00000477314.1;ENST00000320442.7;ENST00000440686.4;ENST00000474359.5
cg12930882	GDNF;GDNF;GDNF	5	37825585	TRUE		0.453519	0.195474	-0.258045	-0.296869	9.74078e-33	2.0778e-29	FALSE	protein_coding;protein_coding;protein_coding;protein_coding;protein_coding;protein_coding;protein_coding;protein_coding	ENST00000326524.5;ENST00000344622.7;ENST00000381826.7;ENST00000427982.4;ENST00000502572.1;ENST00000510177.4;ENST00000515058.4;ENST00000620847.1
cg12967723	SLC12A9;TRIP6	7	100464145	NA	N_Shore	0.411315	0.859522	0.448207	0.418412	2.67533e-16	7.49331e-14	FALSE	protein_coding;protein_coding;protein_coding;protein_coding;protein_coding;protein_coding;protein_coding;protein_coding;protein_coding;protein_coding;protein_coding	ENST00000354161.6;ENST00000467972.4;ENST00000475687.4;ENST00000487651.4;ENST00000200457.7;ENST00000417475.4;ENST00000437505.4;ENST00000476870.4;ENST00000496260.1;ENST00000619988.3;ENST00000629911.1
cg12990614	SOX10	22	38379749	NA	N_Shore	0.5989	0.286853	-0.312047	-0.270313	8.73192e-24	7.04112e-21	FALSE	protein_coding;protein_coding;protein_coding;sense_overlapping;protein_coding;protein_coding;protein_coding;protein_coding;protein_coding	ENST00000405557.4;ENST00000407936.4;ENST00000443002.4;ENST00000623111.1;ENST00000360880.5;ENST00000396884.5;ENST00000427770.1;ENST00000446929.4;ENST00000470555.1
cg13003311	ADGRV1;ADGRV1	5	89853284	NA	S_Shore	0.481247	0.29184	-0.189406	-0.302696	1.26954e-28	1.76764e-25	FALSE	protein_coding;protein_coding	ENST00000405460.5;ENST00000508842.4
cg13010014	ROBO3	11	124740965	NA		0.607047	0.394831	-0.212216	-0.31119	6.29474e-26	6.30957e-23	FALSE	protein_coding;protein_coding	ENST00000397801.4;ENST00000538940.4
cg13011961		3	67291183	TRUE		0.490741	0.868488	0.377747	0.188305	2.64626e-11	3.17682e-09	FALSE	.	.
cg13019568		14	95826830	NA	N_Shelf	0.386367	0.109456	-0.276911	-0.248045	3.10955e-18	1.16579e-15	FALSE	.	.
cg13033938	IP6K1;IP6K1	3	49824475	NA		0.038965	0.241401	0.202436	0.221211	7.45767e-24	6.04739e-21	FALSE	protein_coding;protein_coding;protein_coding;protein_coding;protein_coding;protein_coding;protein_coding	ENST00000321599.7;ENST00000395238.4;ENST00000460540.1;ENST00000468463.4;ENST00000495152.1;ENST00000498149.1;ENST00000613416.3
cg13038847		22	28073997	NA	N_Shore	0.887041	0.356887	-0.530154	-0.621533	2.3149e-38	9.92468e-35	FALSE	lincRNA	ENST00000440255.1
cg13080716		7	23514478	NA		0.137402	0.0286985	-0.108704	-0.0673182	5.85365e-06	0.000167354	FALSE	.	.
cg13132497		15	100469152	NA	S_Shore	0.620103	0.383498	-0.236604	-0.44461	1.4119e-16	4.11703e-14	FALSE	.	.
cg13138089	ECEL1P2	2	233251770	TRUE	Island	0.769164	0.0569454	-0.712219	-0.695582	4.43229e-40	2.31236e-36	FALSE	transcribed_unprocessed_pseudogene;transcribed_unprocessed_pseudogene	ENST00000461596.1;ENST00000465689.1
cg13155490	AQP12B	2	241623510	NA	N_Shore	0.424242	0.699697	0.275455	0.268695	2.17611e-20	1.10728e-17	FALSE	protein_coding;protein_coding;protein_coding;protein_coding;protein_coding	ENST00000407834.3;ENST00000413999.4;ENST00000414322.4;ENST00000452886.2;ENST00000621682.3
cg13156931	URAD	13	28554471	NA		0.400128	0.19052	-0.209608	-0.317323	2.39249e-20	1.2131e-17	FALSE	protein_coding	ENST00000332715.5
cg13165009	C17orf102	17	32905661	TRUE	N_Shore	0.191325	0.0594645	-0.13186	-0.108032	1.16441e-17	4.01124e-15	FALSE	lincRNA	ENST00000623254.1
cg13218688	FAM69C	18	72125544	NA	Island	0.538698	0.414716	-0.123982	-0.307395	7.73861e-23	5.31055e-20	FALSE	protein_coding;protein_coding	ENST00000343998.7;ENST00000400291.2
cg13224583	PEAR1	1	156883745	TRUE	S_Shore	0.613877	0.226253	-0.387625	-0.387784	4.28421e-21	2.44741e-18	FALSE	protein_coding;protein_coding;protein_coding;protein_coding	ENST00000292357.7;ENST00000338302.6;ENST00000465101.1;ENST00000469390.4
cg13238479	MAB21L1;MIR548F5;NBEA	13	36049673	NA	S_Shore	0.291515	0.14283	-0.148685	-0.146565	2.24121e-25	2.15185e-22	FALSE	protein_coding;protein_coding;protein_coding;protein_coding;protein_coding;protein_coding	ENST00000379919.5;ENST00000310336.7;ENST00000379939.5;ENST00000400445.6;ENST00000537702.4;ENST00000629018.1
cg13269964	CD300LG;CD300LG;CD300LG;CD300LG;CD300LG;CD300LG;CD300LG;CD300LG	17	41924577	TRUE		0.810611	0.65658	-0.154031	-0.177048	9.49666e-19	3.8468e-16	FALSE	protein_coding;protein_coding;protein_coding;protein_coding;protein_coding;protein_coding	ENST00000293396.11;ENST00000317310.4;ENST00000377203.7;ENST00000539718.4;ENST00000586233.4;ENST00000588884.1
cg13273128		2	45241620	NA	S_Shore	0.238585	0.116842	-0.121743	-0.111758	4.62775e-13	7.69547e-11	FALSE	lincRNA	ENST00000423433.1
cg13274149	TOR4A	9	140175393	NA		0.403602	0.0995871	-0.304015	-0.34166	6.66689e-41	3.65428e-37	FALSE	protein_coding	ENST00000357503.2
cg13291570		8	514736	NA		0.494295	0.252664	-0.241631	-0.43441	3.15619e-23	2.32035e-20	FALSE	.	.
cg13365524	SIM1	6	100902093	NA	S_Shore	0.189276	0.0718341	-0.117442	-0.0853798	6.90567e-09	4.93609e-07	FALSE	protein_coding;protein_coding	ENST00000262901.4;ENST00000369208.6
cg13377102	KCNAB3	17	7832764	NA	Island	0.836387	0.161106	-0.675281	-0.633942	3.03639e-34	8.01713e-31	FALSE	protein_coding;protein_coding;protein_coding;protein_coding;protein_coding	ENST00000303790.2;ENST00000570587.4;ENST00000570852.1;ENST00000574006.4;ENST00000573621.1
cg13382288	SYT2;SYT2	1	202614046	NA		0.211903	0.0707585	-0.141145	-0.161602	4.67892e-35	1.40115e-31	FALSE	protein_coding;protein_coding	ENST00000367267.4;ENST00000367268.4
cg13392258		17	77806190	TRUE	Island	0.45818	0.0825397	-0.37564	-0.279939	3.89754e-30	6.34476e-27	FALSE	.	.
cg13401823	NFASC;NFASC;NFASC;NFASC;NFASC	1	204910715	TRUE	N_Shore	0.583746	0.420221	-0.163526	-0.22529	9.47664e-17	2.8457e-14	FALSE	protein_coding;protein_coding;protein_coding;protein_coding;protein_coding;protein_coding;protein_coding;protein_coding;protein_coding;protein_coding	ENST00000339876.9;ENST00000360049.7;ENST00000401399.4;ENST00000403080.4;ENST00000404076.4;ENST00000404977.5;ENST00000493914.4;ENST00000505079.4;ENST00000514644.4;ENST00000539706.4
cg13407335	KCNAB3	17	7832852	NA	Island	0.824152	0.0553746	-0.768778	-0.699505	6.87193e-45	5.61447e-41	FALSE	protein_coding;protein_coding;protein_coding;protein_coding	ENST00000303790.2;ENST00000570587.4;ENST00000570852.1;ENST00000573621.1
cg13419925	MFSD1;MFSD1	3	158518910	NA	Island	0.713228	0.459811	-0.253417	-0.292908	4.87283e-14	9.53467e-12	FALSE	protein_coding;protein_coding;protein_coding;protein_coding;protein_coding;protein_coding;protein_coding;protein_coding;protein_coding;protein_coding;protein_coding;protein_coding;protein_coding	ENST00000264266.11;ENST00000392813.7;ENST00000415822.5;ENST00000465739.4;ENST00000471266.4;ENST00000471500.4;ENST00000474670.5;ENST00000480292.4;ENST00000482835.1;ENST00000484166.4;ENST00000486568.4;ENST00000491804.1;ENST00000622669.3
cg13485366		9	137174989	TRUE		0.508363	0.883357	0.374994	0.340856	3.01383e-39	1.45005e-35	TRUE	.	.
cg13497089	SCD5;SCD5	4	83718406	NA	N_Shore	0.738736	0.391389	-0.347346	-0.341879	6.8775e-23	4.74973e-20	FALSE	protein_coding;protein_coding	ENST00000273908.4;ENST00000319540.7
cg13555278	EXTL1;EXTL1	1	26348484	TRUE		0.718872	0.376746	-0.342126	-0.373913	3.94502e-34	1.02291e-30	FALSE	protein_coding;protein_coding;protein_coding	ENST00000374280.3;ENST00000481377.4;ENST00000484339.1
cg13560901	TRIL	7	28998540	NA	Island	0.440723	0.219173	-0.22155	-0.19372	1.11014e-20	5.91279e-18	FALSE	lincRNA;protein_coding	ENST00000436594.1;ENST00000539664.2
cg13600622	LMX1B	9	129393201	TRUE	S_Shore	0.325303	0.239166	-0.0861377	-0.0687282	1.44914e-05	0.000349935	FALSE	protein_coding;protein_coding;protein_coding;protein_coding	ENST00000355497.8;ENST00000373474.7;ENST00000526117.4;ENST00000561065.1
cg13633560	LRRC32;LRRC32;LRRC32	11	76380921	NA	N_Shore	0.371058	0.156147	-0.214911	-0.169801	1.23464e-08	8.29773e-07	FALSE	protein_coding;protein_coding;protein_coding;protein_coding	ENST00000260061.8;ENST00000404995.4;ENST00000407242.5;ENST00000421973.1
cg13646917	PTPRJ;PTPRJ	11	48001761	NA	S_Shore	0.223364	0.103422	-0.119942	-0.152662	4.52336e-18	1.66273e-15	FALSE	protein_coding;protein_coding;protein_coding;protein_coding;protein_coding;protein_coding	ENST00000418331.5;ENST00000440289.5;ENST00000527952.1;ENST00000534219.4;ENST00000613246.3;ENST00000615445.3
cg13677022	ARID3C	9	34625963	NA	Island	0.816432	0.66155	-0.154881	-0.231334	2.1434e-26	2.25822e-23	FALSE	protein_coding	ENST00000378909.2
cg13705830		9	89518557	TRUE		0.641032	0.601661	-0.0393709	-0.224083	2.1104e-12	3.10618e-10	FALSE	.	.
cg13735819	JSRP1	19	2253850	NA		0.243805	0.0858365	-0.157969	-0.174211	1.27683e-13	2.32992e-11	FALSE	protein_coding;protein_coding	ENST00000300961.9;ENST00000593238.2
cg13753527		9	37040454	TRUE	S_Shore	0.774754	0.606466	-0.168288	-0.307551	5.97995e-20	2.84552e-17	FALSE	.	.
cg13803234	RAD51B;RAD51B;RAD51B	14	68830813	TRUE	N_Shore	0.613613	0.357625	-0.255988	-0.268994	4.0859e-15	9.57914e-13	FALSE	protein_coding;protein_coding;protein_coding;protein_coding;protein_coding;protein_coding;protein_coding;protein_coding;protein_coding;protein_coding;protein_coding;protein_coding;protein_coding;protein_coding	ENST00000460526.4;ENST00000468382.4;ENST00000469165.5;ENST00000471583.4;ENST00000478014.4;ENST00000479335.4;ENST00000487270.4;ENST00000487861.4;ENST00000488612.4;ENST00000492236.4;ENST00000497460.4;ENST00000553595.4;ENST00000554244.4;ENST00000557045.4
cg13809236	MAPK8IP1	11	45908036	NA	N_Shore	0.710747	0.394324	-0.316422	-0.366571	3.17929e-30	5.23455e-27	FALSE	protein_coding	ENST00000241014.5
cg13844049		1	68759259	TRUE		0.288914	0.145784	-0.14313	-0.273761	3.73043e-29	5.43887e-26	FALSE	.	.
cg13870494	MAMDC2	9	72658358	NA	Island	0.835467	0.240664	-0.594803	-0.676699	3.9884e-51	8.22405e-47	FALSE	protein_coding;antisense;antisense;antisense	ENST00000377182.4;ENST00000628563.1;ENST00000629922.1;ENST00000630191.1
cg13895343	SARM1	17	26708773	NA	S_Shore	0.532205	0.126886	-0.405319	-0.338716	3.00298e-27	3.53354e-24	FALSE	protein_coding;protein_coding	ENST00000379061.7;ENST00000585482.4
cg13903421	WNT6	2	219738714	NA	S_Shore	0.388863	0.0860575	-0.302805	-0.298275	4.69189e-35	1.40115e-31	FALSE	protein_coding	ENST00000233948.3
cg13924715		11	10750890	NA	S_Shore	0.94216	0.201262	-0.740898	-0.732186	4.8573e-56	1.75275e-51	FALSE	.	.
cg13928759	LGI1	10	95517382	TRUE	S_Shore	0.639585	0.388776	-0.250809	-0.335348	4.2673e-26	4.38912e-23	FALSE	protein_coding;protein_coding;protein_coding;protein_coding;protein_coding;protein_coding;protein_coding;protein_coding;protein_coding	ENST00000371413.4;ENST00000371418.7;ENST00000478763.2;ENST00000627420.1;ENST00000627699.1;ENST00000629035.1;ENST00000630047.1;ENST00000630184.1;ENST00000630487.1
cg13935577	BTBD11;BTBD11	12	107974897	NA	N_Shelf	0.819923	0.294439	-0.525485	-0.472344	3.96567e-14	7.89158e-12	FALSE	protein_coding;protein_coding;protein_coding;protein_coding;protein_coding;protein_coding	ENST00000280758.8;ENST00000357167.7;ENST00000415943.5;ENST00000420571.5;ENST00000490090.5;ENST00000550706.4
cg13946341		9	128799328	NA		0.254603	0.152502	-0.102101	-0.167032	7.50597e-14	1.4293e-11	FALSE	.	.
cg13948430		2	132152960	NA		0.837952	0.683595	-0.154357	-0.181587	6.71413e-18	2.40674e-15	TRUE	processed_pseudogene	ENST00000413613.1
cg13953753	VAX1;VAX1	10	118896012	NA	Island	0.579334	0.345727	-0.233607	-0.237206	1.93659e-17	6.44564e-15	FALSE	protein_coding;protein_coding	ENST00000277905.5;ENST00000369206.5
cg13957413		15	89942156	NA	Island	0.822246	0.54933	-0.272916	-0.337226	7.40358e-19	3.04742e-16	FALSE	.	.
cg13985437	LRRC32;LRRC32	11	76381044	NA	S_Shore	0.257059	0.108469	-0.14859	-0.102476	1.02717e-07	5.37244e-06	FALSE	protein_coding;protein_coding;protein_coding;protein_coding	ENST00000260061.8;ENST00000404995.4;ENST00000407242.5;ENST00000421973.1
cg13985518	HOXA2	7	27143788	TRUE	Island	0.740546	0.416377	-0.324169	-0.299697	1.74704e-23	1.33422e-20	FALSE	protein_coding;protein_coding	ENST00000222718.6;ENST00000612779.1
cg14011845	TBX4	17	59533635	NA	Island	0.574441	0.39413	-0.180312	-0.210953	6.87679e-13	1.11028e-10	FALSE	protein_coding;protein_coding;protein_coding	ENST00000240335.1;ENST00000393853.7;ENST00000589003.4
cg14060518		5	134880967	NA	Island	0.83099	0.599858	-0.231132	-0.230477	1.30734e-20	6.88688e-18	FALSE	.	.
cg14071650	LMX1B	9	129379319	NA	Island	0.443968	0.185298	-0.258671	-0.267934	5.48908e-21	3.07089e-18	FALSE	protein_coding;protein_coding;protein_coding;protein_coding	ENST00000355497.8;ENST00000373474.7;ENST00000526117.4;ENST00000561065.1
cg14074251	SPEG	2	220299116	TRUE	Island	0.700882	0.408643	-0.292239	-0.363296	3.31011e-45	2.86667e-41	FALSE	protein_coding	ENST00000312358.10
cg14120215	SDS;SDS	12	113841668	NA	Island	0.167193	0.479762	0.31257	0.196089	1.56293e-16	4.53605e-14	FALSE	protein_coding;protein_coding;protein_coding;protein_coding;protein_coding;protein_coding	ENST00000257549.7;ENST00000546639.1;ENST00000546785.1;ENST00000547342.1;ENST00000552280.4;ENST00000553112.4
cg14181527		14	37125004	TRUE		0.621675	0.443585	-0.17809	-0.177625	3.51204e-18	1.30427e-15	FALSE	antisense	ENST00000555107.1
cg14205016		11	8290476	TRUE	Island	0.417612	0.252537	-0.165074	-0.180602	4.4476e-19	1.8993e-16	FALSE	protein_coding	ENST00000428101.5
cg14214165	TNS1	2	218777482	TRUE	N_Shelf	0.712633	0.442016	-0.270617	-0.301227	3.49643e-20	1.72833e-17	FALSE	protein_coding;protein_coding;protein_coding;protein_coding;protein_coding;protein_coding;protein_coding;protein_coding;protein_coding	ENST00000171887.7;ENST00000413280.4;ENST00000419504.4;ENST00000423413.1;ENST00000430930.4;ENST00000446903.4;ENST00000449814.1;ENST00000611415.3;ENST00000615025.3
cg14214856		10	36965362	TRUE		0.172789	0.507968	0.335179	0.357261	5.47441e-24	4.51527e-21	FALSE	.	.
cg14244636		10	100055918	TRUE	N_Shore	0.612319	0.379454	-0.232865	-0.33919	2.29128e-28	3.05281e-25	FALSE	.	.
cg14265704	VAX2	2	71131201	NA	S_Shore	0.472829	0.25542	-0.217409	-0.17807	4.27462e-14	8.452e-12	FALSE	protein_coding	ENST00000234392.2
cg14270302		6	32114687	TRUE		0.628572	0.432006	-0.196566	-0.220085	4.27988e-15	1.00014e-12	FALSE	.	.
cg14285533		7	63386328	NA	N_Shore	0.263302	0.0744893	-0.188813	-0.266175	6.33411e-09	4.5713e-07	FALSE	miRNA;transcribed_processed_pseudogene;transcribed_processed_pseudogene;transcribed_processed_pseudogene	ENST00000582948.1;ENST00000419937.1;ENST00000434426.1;ENST00000451395.1
cg14290170		9	138136674	NA	Island	0.792339	0.888614	0.096275	0.111145	3.9188e-11	4.54881e-09	FALSE	.	.
cg14292870	LAG3	12	6887543	TRUE		0.839007	0.272158	-0.566849	-0.524569	1.48622e-46	1.69357e-42	FALSE	protein_coding;protein_coding;protein_coding	ENST00000203629.2;ENST00000538079.1;ENST00000541049.1
cg14295062	ENTPD2;ENTPD2	9	139949108	NA		0.598064	0.411851	-0.186213	-0.298126	5.47688e-36	1.79666e-32	FALSE	protein_coding;protein_coding;protein_coding	ENST00000312665.7;ENST00000355097.5;ENST00000469106.4
cg14302936	GLIPR2	9	36135812	NA	N_Shore	0.694599	0.429981	-0.264618	-0.281387	3.35786e-12	4.76882e-10	FALSE	protein_coding;protein_coding;protein_coding;protein_coding	ENST00000377959.4;ENST00000377960.7;ENST00000396613.6;ENST00000619700.1
cg14305711	COMMD1	2	62132430	NA	Island	0.154038	0.403242	0.249204	0.238607	1.37079e-20	7.16014e-18	FALSE	protein_coding;protein_coding;protein_coding;protein_coding;protein_coding	ENST00000311832.5;ENST00000445644.4;ENST00000455659.1;ENST00000471704.1;ENST00000472729.1
cg14334161	NODAL	10	72201622	TRUE	N_Shore	0.733331	0.509978	-0.223352	-0.264611	4.01458e-25	3.66748e-22	FALSE	protein_coding;protein_coding	ENST00000287139.6;ENST00000414871.1
cg14370713	EPB41L4B;EPB41L4B	9	112017985	NA	S_Shore	0.517623	0.250652	-0.266971	-0.402096	1.22557e-30	2.07302e-27	FALSE	protein_coding;protein_coding	ENST00000374557.4;ENST00000374566.6
cg14375747	FBXL14	12	1675969	NA		0.796833	0.472695	-0.324138	-0.479317	1.22993e-28	1.72356e-25	TRUE	protein_coding;protein_coding;protein_coding	ENST00000339235.3;ENST00000539198.4;ENST00000545811.4
cg14422782	PML;PML;PML;PML;PML;PML;PML;PML;PML	15	74312279	NA	N_Shore	0.504896	0.782274	0.277377	0.257299	4.04346e-13	6.80222e-11	FALSE	protein_coding;protein_coding;protein_coding;protein_coding;protein_coding;protein_coding;protein_coding;protein_coding;protein_coding;protein_coding;protein_coding;protein_coding;protein_coding;protein_coding;protein_coding	ENST00000268058.6;ENST00000268059.9;ENST00000354026.9;ENST00000359928.7;ENST00000395132.5;ENST00000395135.6;ENST00000435786.5;ENST00000436891.6;ENST00000563500.4;ENST00000564428.4;ENST00000564725.1;ENST00000565898.4;ENST00000567543.4;ENST00000569477.4;ENST00000569965.4
cg14437996	SHC3	9	91794687	TRUE	Island	0.491833	0.323339	-0.168494	-0.227016	3.67711e-14	7.37839e-12	FALSE	protein_coding	ENST00000375835.7
cg14449575	HAPLN4	19	19373743	NA	Island	0.469436	0.356956	-0.11248	-0.106203	3.79867e-14	7.59766e-12	FALSE	processed_transcript;protein_coding;protein_coding	ENST00000586064.3;ENST00000291481.7;ENST00000592862.2
cg14479798		10	129533998	NA	N_Shore	0.510429	0.128306	-0.382123	-0.445787	3.50128e-56	1.37829e-51	FALSE	TEC	ENST00000623953.1
cg14513071	FOXD2;FOXD2	1	47905517	NA		0.633733	0.261553	-0.37218	-0.34538	6.81932e-28	8.55909e-25	FALSE	protein_coding	ENST00000334793.5
cg14518658		22	37726676	TRUE	S_Shore	0.393793	0.238477	-0.155316	-0.222976	1.93872e-20	9.94669e-18	FALSE	.	.
cg14529565		9	96705256	NA	N_Shelf	0.23342	0.166131	-0.0672887	-0.111071	3.18823e-14	6.46936e-12	FALSE	.	.
cg14590011		6	34113887	NA	N_Shore	0.358886	0.232758	-0.126128	-0.162325	2.2573e-20	1.14724e-17	FALSE	protein_coding;protein_coding;protein_coding;protein_coding	ENST00000374177.6;ENST00000374181.7;ENST00000538487.5;ENST00000609278.1
cg14592794	SARM1	17	26700958	NA	N_Shore	0.315039	0.05699	-0.258049	-0.191872	3.93114e-14	7.83006e-12	FALSE	processed_transcript;TEC;protein_coding;protein_coding;protein_coding	ENST00000591482.1;ENST00000623773.1;ENST00000379061.7;ENST00000585482.4;ENST00000542029.1
cg14605021	FGF20	8	16859754	NA		0.308466	0.143314	-0.165151	-0.160711	1.65281e-24	1.42854e-21	FALSE	protein_coding;protein_coding	ENST00000180166.5;ENST00000519941.1
cg14624314	SH3RF2	5	145328877	TRUE		0.755574	0.919248	0.163674	0.231117	8.44018e-17	2.56114e-14	FALSE	protein_coding;protein_coding	ENST00000359120.7;ENST00000511217.1
cg14625581		17	75692478	NA	Island	0.404285	0.069249	-0.335036	-0.443782	4.08666e-30	6.62771e-27	FALSE	.	.
cg14644418	FOXI2	10	129536661	NA	N_Shore	0.775145	0.233322	-0.541824	-0.553897	1.0137e-45	1.02081e-41	FALSE	protein_coding;TEC	ENST00000388920.4;ENST00000623953.1
cg14652587		17	75692571	NA	Island	0.533814	0.101105	-0.432709	-0.627433	9.71157e-32	1.83637e-28	TRUE	.	.
cg14654731	TMEM155;PP12613	4	122685145	NA		0.637182	0.400069	-0.237113	-0.24221	1.52736e-14	3.25276e-12	FALSE	antisense;protein_coding;protein_coding;protein_coding;protein_coding;protein_coding;protein_coding;protein_coding;protein_coding	ENST00000424958.2;ENST00000337677.8;ENST00000394394.4;ENST00000394396.4;ENST00000461198.4;ENST00000505198.4;ENST00000506551.2;ENST00000513254.4;ENST00000514885.4
cg14696458		1	91185157	NA		0.234761	0.126931	-0.107829	-0.159237	8.52935e-11	9.31491e-09	FALSE	.	.
cg14699734		19	5806164	NA		0.403234	0.124949	-0.278285	-0.260876	1.73837e-27	2.10854e-24	FALSE	.	.
cg14714537	SLC26A7;SLC26A7	8	92261789	NA	S_Shore	0.0650738	0.540444	0.47537	0.502496	3.85849e-32	7.6642e-29	FALSE	protein_coding;protein_coding;protein_coding;protein_coding;protein_coding;protein_coding;protein_coding	ENST00000276609.6;ENST00000309536.5;ENST00000522181.4;ENST00000522862.4;ENST00000523719.4;ENST00000617078.2;ENST00000617233.2
cg14716990		10	129533731	NA	N_Shore	0.404888	0.0363762	-0.368512	-0.337031	5.5055e-33	1.22255e-29	FALSE	TEC	ENST00000623953.1
cg14736365		5	173947646	TRUE	S_Shore	0.608511	0.361203	-0.247308	-0.310241	6.96279e-26	6.91517e-23	FALSE	lincRNA;lincRNA;lincRNA;lincRNA;lincRNA;lincRNA	ENST00000504512.4;ENST00000506862.1;ENST00000507361.4;ENST00000510234.4;ENST00000511707.4;ENST00000515513.4
cg14742937	ADAM5	8	39172097	NA	S_Shore	0.679073	0.271451	-0.407622	-0.455433	3.01385e-18	1.13187e-15	FALSE	unitary_pseudogene;unitary_pseudogene;unitary_pseudogene;unitary_pseudogene;unitary_pseudogene;unitary_pseudogene;unitary_pseudogene;unitary_pseudogene;unitary_pseudogene	ENST00000359790.8;ENST00000399789.5;ENST00000417441.5;ENST00000433441.5;ENST00000464901.4;ENST00000497773.4;ENST00000505455.4;ENST00000512764.4;ENST00000519063.5
cg14747813		8	23848786	TRUE	Island	0.52801	0.858712	0.330702	0.163635	1.99074e-12	2.95114e-10	FALSE	.	.
cg14762670	CACNA2D1	7	82073810	NA		0.488343	0.328604	-0.159739	-0.199099	2.51257e-29	3.70064e-26	FALSE	protein_coding;protein_coding;protein_coding	ENST00000356253.8;ENST00000356860.6;ENST00000423588.1
cg14778169	CACNA2D1	7	82073751	NA	Island	0.427285	0.241567	-0.185718	-0.210245	1.48839e-32	3.06904e-29	FALSE	protein_coding;protein_coding;protein_coding	ENST00000356253.8;ENST00000356860.6;ENST00000423588.1
cg14794735	MIR183;MIR96	7	129415968	NA		0.839159	0.578748	-0.260411	-0.380051	8.21355e-37	2.89156e-33	FALSE	miRNA;miRNA	ENST00000384958.1;ENST00000362288.1
cg14800351	PAX6;PAX6;PAX6	11	31817881	NA	Island	0.399824	0.265919	-0.133905	-0.141017	7.68063e-17	2.34711e-14	FALSE	protein_coding;protein_coding;protein_coding;protein_coding;protein_coding;protein_coding;protein_coding;protein_coding;protein_coding;protein_coding;protein_coding;protein_coding;protein_coding;protein_coding;protein_coding;protein_coding;protein_coding;protein_coding	ENST00000241001.11;ENST00000379107.5;ENST00000379109.5;ENST00000379111.5;ENST00000379115.7;ENST00000379123.8;ENST00000379129.5;ENST00000379132.6;ENST00000419022.4;ENST00000455099.4;ENST00000464174.4;ENST00000470027.5;ENST00000471303.4;ENST00000494377.5;ENST00000530373.4;ENST00000531910.4;ENST00000533333.4;ENST00000606377.4
cg14823389		7	101398152	NA	S_Shore	0.244455	0.816676	0.572222	0.462717	1.71075e-25	1.65354e-22	FALSE	.	.
cg14836522	SDC3	1	31375133	TRUE	S_Shore	0.643095	0.344678	-0.298418	-0.341813	8.55339e-16	2.22583e-13	FALSE	protein_coding	ENST00000339394.6
cg14844989		11	31128820	NA	Island	0.47384	0.31005	-0.16379	-0.37212	8.79536e-24	7.05287e-21	FALSE	protein_coding;protein_coding;protein_coding;protein_coding	ENST00000342355.7;ENST00000437348.4;ENST00000534722.4;ENST00000597505.4
cg14854355	SARM1	17	26708366	NA		0.357452	0.119877	-0.237575	-0.142614	2.77426e-14	5.67992e-12	FALSE	processed_transcript;protein_coding;protein_coding	ENST00000591482.1;ENST00000379061.7;ENST00000585482.4
cg14858616		10	72219819	NA	S_Shore	0.53042	0.348863	-0.181558	-0.238998	1.97e-23	1.49395e-20	FALSE	.	.
cg14867085		11	17623131	TRUE		0.622143	0.301826	-0.320317	-0.315918	3.40525e-28	4.46828e-25	FALSE	protein_coding;protein_coding;protein_coding	ENST00000342528.2;ENST00000399391.5;ENST00000399397.4
cg14918082	KCNAB3	17	7833237	NA		0.701474	0.0910706	-0.610403	-0.538674	1.11422e-27	1.3668e-24	FALSE	protein_coding;protein_coding;protein_coding;protein_coding	ENST00000303790.2;ENST00000570587.4;ENST00000570852.1;ENST00000573621.1
cg14956327	DDO;DDO	6	110737053	NA		0.383662	0.783043	0.399381	0.333739	1.52964e-18	5.97258e-16	FALSE	protein_coding;protein_coding;protein_coding	ENST00000368923.6;ENST00000368924.6;ENST00000479373.1
cg14983135	UPP1;UPP1	7	48129822	NA	N_Shore	0.736439	0.353081	-0.383358	-0.454807	3.82573e-23	2.77955e-20	FALSE	protein_coding;protein_coding;protein_coding;protein_coding;protein_coding;protein_coding;protein_coding;protein_coding;protein_coding;protein_coding;protein_coding	ENST00000331803.7;ENST00000395560.6;ENST00000395564.7;ENST00000416681.4;ENST00000417464.5;ENST00000421046.4;ENST00000432131.4;ENST00000436673.4;ENST00000444999.4;ENST00000457596.4;ENST00000482015.4
cg14984126	PLCH2	1	2409866	NA	N_Shore	0.680433	0.563221	-0.117211	-0.201159	4.44284e-27	5.11657e-24	FALSE	protein_coding;protein_coding;protein_coding;protein_coding;protein_coding;protein_coding	ENST00000278878.6;ENST00000343889.7;ENST00000378486.6;ENST00000419816.5;ENST00000449969.4;ENST00000609981.4
cg15012662	CADPS2;CADPS2;CADPS2	7	122443513	TRUE	Island	0.297189	0.766173	0.468984	0.275324	1.70064e-16	4.9225e-14	FALSE	protein_coding;protein_coding;protein_coding;protein_coding;protein_coding	ENST00000313070.10;ENST00000334010.10;ENST00000412584.5;ENST00000449022.5;ENST00000615869.3
cg15028458	C3orf67	3	58860290	TRUE	S_Shore	0.561092	0.959682	0.398591	0.20248	1.74861e-05	0.000407065	FALSE	protein_coding;protein_coding;protein_coding;protein_coding;protein_coding;antisense;antisense;antisense;antisense	ENST00000295966.10;ENST00000468415.5;ENST00000472469.4;ENST00000482387.4;ENST00000619205.3;ENST00000463703.4;ENST00000482372.1;ENST00000492031.4;ENST00000493123.1
cg15059804	ZNF362	1	33766318	TRUE	Island	0.554957	0.916636	0.361679	0.341107	1.02084e-10	1.09661e-08	FALSE	protein_coding;protein_coding	ENST00000373428.5;ENST00000539719.4
cg15089077	TTC22	1	55246867	TRUE	S_Shore	0.670895	0.235908	-0.434987	-0.505041	2.63224e-51	5.69903e-47	FALSE	protein_coding	ENST00000371276.7
cg15128226	FGF2	4	123747672	NA		0.391643	0.131481	-0.260162	-0.206581	1.821e-13	3.24898e-11	FALSE	miRNA;protein_coding;protein_coding;protein_coding	ENST00000517260.1;ENST00000264498.6;ENST00000608478.1;ENST00000614010.3
cg15161667	LRP4	11	46940613	NA	N_Shore	0.781647	0.606788	-0.174858	-0.159115	1.62419e-06	5.73282e-05	FALSE	protein_coding;protein_coding	ENST00000378623.4;ENST00000534404.1
cg15182635	ZNF503-AS2;ZNF503-AS2	10	77165167	NA	S_Shelf	0.167682	0.0244574	-0.143224	-0.134765	1.22861e-15	3.11848e-13	FALSE	antisense;antisense;antisense;antisense;antisense;antisense	ENST00000425916.4;ENST00000466942.2;ENST00000484411.1;ENST00000486015.1;ENST00000491557.2;ENST00000527641.1
cg15194163	PRRT1	6	32118213	NA	Island	0.348565	0.155278	-0.193287	-0.187409	2.82601e-28	3.75372e-25	FALSE	protein_coding;protein_coding;protein_coding;protein_coding;protein_coding	ENST00000211413.8;ENST00000375150.5;ENST00000467780.4;ENST00000472641.1;ENST00000495191.4
cg15196156		1	40388395	NA	S_Shore	0.724775	0.493959	-0.230816	-0.315323	1.81427e-31	3.34303e-28	FALSE	.	.
cg15237152	CNN1;CNN1	19	11649631	NA	Island	0.191105	0.0827521	-0.108353	-0.108903	3.22103e-09	2.49734e-07	FALSE	protein_coding;protein_coding;protein_coding;protein_coding;protein_coding;protein_coding	ENST00000252456.5;ENST00000535659.5;ENST00000585869.1;ENST00000586059.4;ENST00000588468.1;ENST00000592923.4
cg15255827		18	8707556	NA	N_Shore	0.352309	0.210131	-0.142178	-0.163663	4.39472e-13	7.3418e-11	FALSE	antisense;protein_coding;protein_coding	ENST00000579368.1;ENST00000306329.14;ENST00000517570.4
cg15332217	URAD	13	28555064	NA		0.42317	0.186687	-0.236483	-0.418641	7.89566e-23	5.40975e-20	FALSE	protein_coding	ENST00000332715.5
cg15399533	NR2E1	6	108497995	NA	N_Shore	0.58098	0.364237	-0.216744	-0.255775	5.67008e-23	3.9537e-20	FALSE	protein_coding;protein_coding;protein_coding	ENST00000368983.3;ENST00000368986.7;ENST00000484978.1
cg15435170	HOXB-AS3;HOXB-AS3;HOXB6	17	46681135	NA	Island	0.58349	0.298599	-0.284891	-0.37334	1.05807e-26	1.16878e-23	FALSE	antisense;antisense;antisense;antisense;antisense;protein_coding;protein_coding;protein_coding;protein_coding	ENST00000466037.5;ENST00000467155.5;ENST00000487849.6;ENST00000491264.4;ENST00000494420.1;ENST00000552000.2;ENST00000225648.3;ENST00000484302.3;ENST00000490419.1
cg15534366	CDH4	20	59826207	NA	Island	0.860563	0.464354	-0.396209	-0.43865	2.91402e-25	2.73715e-22	FALSE	protein_coding	ENST00000614565.3
cg15548613	MAFF;MAFF;MAFF;MAFF	22	38610795	TRUE	S_Shore	0.416405	0.0446901	-0.371714	-0.317473	5.65204e-41	3.13774e-37	FALSE	protein_coding;protein_coding;protein_coding;protein_coding;protein_coding	ENST00000338483.5;ENST00000407965.1;ENST00000426621.5;ENST00000538320.4;ENST00000538999.1
cg15572436	SLC22A8	11	62767169	NA	N_Shore	0.15323	0.438533	0.285302	0.262308	1.58616e-41	9.28156e-38	FALSE	protein_coding;protein_coding;protein_coding;protein_coding;protein_coding;protein_coding;protein_coding;protein_coding	ENST00000311438.11;ENST00000336232.5;ENST00000430500.5;ENST00000535878.4;ENST00000539841.1;ENST00000542795.4;ENST00000542904.1;ENST00000545207.4
cg15575683		1	156358612	NA		0.308993	0.222906	-0.0860873	-0.110554	8.95361e-15	1.98214e-12	TRUE	lincRNA	ENST00000451362.1
cg15626881		7	33923464	NA	S_Shore	0.25525	0.717711	0.462462	0.426962	5.37183e-39	2.47457e-35	FALSE	.	.
cg15645660	TTC22	1	55247356	TRUE		0.938864	0.148157	-0.790707	-0.865603	1.69776e-65	1.47032e-60	FALSE	protein_coding;protein_coding	ENST00000371276.7;ENST00000488771.1
cg15652723		4	111560494	NA		0.237054	0.12494	-0.112115	-0.124688	1.27306e-20	6.72264e-18	FALSE	protein_coding;protein_coding;protein_coding;protein_coding;protein_coding;protein_coding	ENST00000354925.5;ENST00000511837.4;ENST00000511990.1;ENST00000613094.3;ENST00000614423.3;ENST00000616641.3
cg15671996	TRIM15	6	30140325	TRUE	Island	0.7196	0.494252	-0.225348	-0.263778	1.31646e-22	8.83801e-20	FALSE	protein_coding;protein_coding;protein_coding	ENST00000376688.2;ENST00000376694.7;ENST00000619857.3
cg15691862	FOXD2;FOXD2	1	47905438	NA	Island	0.348766	0.047944	-0.300822	-0.191379	2.8799e-09	2.25873e-07	FALSE	protein_coding	ENST00000334793.5
cg15734764		10	134266555	TRUE		0.101172	0.300847	0.199675	0.172506	8.48513e-29	1.19681e-25	FALSE	.	.
cg15777760	PAGR1;MVP;MVP	16	29832180	NA	N_Shore	0.307912	0.604167	0.296255	0.286618	1.84998e-10	1.88799e-08	FALSE	antisense;antisense;antisense;protein_coding;protein_coding;protein_coding;protein_coding;protein_coding;protein_coding;protein_coding;protein_coding;protein_coding;protein_coding;protein_coding;protein_coding;protein_coding	ENST00000564980.1;ENST00000569039.4;ENST00000569809.2;ENST00000562285.1;ENST00000357402.8;ENST00000395353.4;ENST00000562463.4;ENST00000563096.1;ENST00000563558.4;ENST00000563915.4;ENST00000565164.1;ENST00000565830.4;ENST00000566066.4;ENST00000566859.4;ENST00000569887.1;ENST00000570234.4
cg15849368		17	1811181	TRUE	Island	0.506739	0.415476	-0.0912633	-0.230909	1.29172e-14	2.79669e-12	FALSE	.	.
cg15906733		17	35423405	NA	Island	0.441703	0.288876	-0.152827	-0.210756	3.88335e-17	1.23826e-14	FALSE	.	.
cg15920743		10	102984393	NA	Island	0.214407	0.0798475	-0.134559	-0.11412	1.32019e-16	3.86783e-14	FALSE	.	.
cg15920975		11	65194933	NA	S_Shore	0.258686	0.65336	0.394674	0.451768	3.71466e-20	1.82578e-17	FALSE	lincRNA	ENST00000501122.2
cg15922699		5	134362967	TRUE		0.366623	0.250311	-0.116312	-0.158265	6.61573e-27	7.47971e-24	FALSE	.	.
cg15951188	KCNAB3	17	7832680	NA		0.827239	0.326037	-0.501202	-0.454845	1.34503e-26	1.46338e-23	FALSE	protein_coding;protein_coding;protein_coding;protein_coding;protein_coding	ENST00000303790.2;ENST00000570587.4;ENST00000570852.1;ENST00000574006.4;ENST00000573621.1
cg15954235	SPDEF	6	34514887	NA		0.384392	0.789056	0.404664	0.326533	4.16161e-29	6.00683e-26	FALSE	protein_coding;protein_coding	ENST00000374037.6;ENST00000544425.2
cg16003238	IGDCC3	15	65670876	NA	S_Shelf	0.655067	0.354519	-0.300548	-0.333581	5.12761e-32	1.00016e-28	FALSE	protein_coding	ENST00000327987.7
cg16044595	GPR137B	1	236304396	NA	N_Shore	0.383279	0.21611	-0.167169	-0.168882	8.17371e-19	3.33902e-16	FALSE	protein_coding;protein_coding;protein_coding	ENST00000366591.4;ENST00000366592.6;ENST00000419162.4
cg16057826	CLIC6	21	36041334	NA		0.561	0.284198	-0.276801	-0.271621	2.88278e-31	5.22299e-28	FALSE	protein_coding;protein_coding	ENST00000349499.2;ENST00000360731.6
cg16069986	SHANK2	11	70650456	NA	N_Shore	0.28228	0.771578	0.489298	0.467327	7.1714e-18	2.5412e-15	FALSE	protein_coding;protein_coding;protein_coding;protein_coding;protein_coding;protein_coding	ENST00000423696.5;ENST00000460048.1;ENST00000468619.4;ENST00000470759.4;ENST00000498519.4;ENST00000601538.4
cg16084133		22	28074146	NA	Island	0.809083	0.341449	-0.467633	-0.536067	1.21877e-34	3.42694e-31	FALSE	lincRNA	ENST00000440255.1
cg16092017		5	134827643	TRUE	N_Shelf	0.527592	0.254553	-0.273039	-0.301831	7.35061e-37	2.60897e-33	FALSE	.	.
cg16125874	CLEC14A;CLEC14A	14	38723500	NA	S_Shore	0.527596	0.250363	-0.277234	-0.368423	3.3917e-28	4.46403e-25	FALSE	protein_coding	ENST00000342213.2
cg16146033	SLC22A8	11	62767323	NA	N_Shore	0.119372	0.70169	0.582318	0.565217	3.79605e-59	2.0547e-54	FALSE	protein_coding;protein_coding;protein_coding;protein_coding;protein_coding;protein_coding;protein_coding;protein_coding	ENST00000311438.11;ENST00000336232.5;ENST00000430500.5;ENST00000535878.4;ENST00000539841.1;ENST00000542795.4;ENST00000542904.1;ENST00000545207.4
cg16154155		8	25906990	NA	S_Shore	0.355952	0.221601	-0.134351	-0.118155	9.57972e-21	5.16587e-18	TRUE	.	.
cg16174681	FER	5	108220453	TRUE		0.38872	0.860428	0.471707	0.451136	4.6944e-17	1.47195e-14	FALSE	protein_coding;protein_coding	ENST00000281092.7;ENST00000504143.5
cg16190265	PRKAR1B;PRKAR1B;PRKAR1B;PRKAR1B;PRKAR1B;PRKAR1B	7	650249	TRUE	Island	0.300102	0.0513226	-0.248779	-0.29059	1.31809e-21	7.99377e-19	FALSE	protein_coding;protein_coding;protein_coding;protein_coding;protein_coding;protein_coding;protein_coding;protein_coding	ENST00000360274.7;ENST00000403562.4;ENST00000406797.4;ENST00000414568.4;ENST00000417852.4;ENST00000430040.4;ENST00000537384.4;ENST00000544935.4
cg16191009	CPNE9	3	9745369	NA	N_Shore	0.880018	0.69958	-0.180438	-0.160321	9.95834e-17	2.978e-14	FALSE	protein_coding;protein_coding;protein_coding;protein_coding	ENST00000383831.6;ENST00000383832.6;ENST00000491802.1;ENST00000613455.3
cg16214053		4	10462849	NA	N_Shore	0.570662	0.403765	-0.166897	-0.262715	3.43141e-27	4.00502e-24	FALSE	.	.
cg16240781	SIX2	2	45234379	NA	N_Shore	0.656266	0.393931	-0.262334	-0.327282	3.54337e-23	2.58742e-20	FALSE	protein_coding	ENST00000303077.6
cg16258223		5	134377058	NA		0.339581	0.178074	-0.161507	-0.20418	1.03667e-24	9.17985e-22	FALSE	antisense;antisense;antisense;lincRNA	ENST00000505828.4;ENST00000507641.4;ENST00000624272.2;ENST00000507035.2
cg16277071		17	75537317	TRUE	Island	0.547951	0.350626	-0.197325	-0.262623	2.59956e-19	1.13891e-16	FALSE	.	.
cg16304521		14	22191827	NA		0.242514	0.126692	-0.115822	-0.157996	6.12915e-10	5.6004e-08	FALSE	TR_V_gene	ENST00000390425.2
cg16312514	SHANK2	11	70650521	NA		0.341295	0.896113	0.554817	0.51821	3.44174e-16	9.46244e-14	FALSE	protein_coding;protein_coding;protein_coding;protein_coding;protein_coding;protein_coding	ENST00000423696.5;ENST00000460048.1;ENST00000468619.4;ENST00000470759.4;ENST00000498519.4;ENST00000601538.4
cg16323034		6	37533807	TRUE	S_Shore	0.329433	0.198444	-0.130989	-0.18758	1.8603e-22	1.22796e-19	FALSE	.	.
cg16331674		22	28074071	NA		0.807663	0.431477	-0.376187	-0.459658	7.50129e-35	2.16546e-31	FALSE	lincRNA	ENST00000440255.1
cg16348158	PRDM16;PRDM16	1	3036916	NA	S_Shore	0.333278	0.798724	0.465445	0.447262	7.37659e-44	5.23639e-40	FALSE	protein_coding;protein_coding;protein_coding;protein_coding;protein_coding	ENST00000270722.8;ENST00000378391.5;ENST00000511072.4;ENST00000514189.4;ENST00000607632.1
cg16366262	TTLL10;TTLL10	1	1118157	NA		0.368907	0.102178	-0.266728	-0.491975	2.34486e-27	2.78182e-24	FALSE	protein_coding;protein_coding;protein_coding;protein_coding	ENST00000379288.3;ENST00000379289.4;ENST00000379290.4;ENST00000460998.1
cg16399632	CTBP1;CTBP1;CTBP1-DT	4	1244006	NA	S_Shelf	0.726318	0.947212	0.220895	0.434853	2.82053e-34	7.58597e-31	FALSE	protein_coding;protein_coding;protein_coding;protein_coding;protein_coding;protein_coding;protein_coding;antisense;antisense;antisense;antisense;antisense	ENST00000290921.9;ENST00000382952.6;ENST00000506180.4;ENST00000513420.1;ENST00000514210.4;ENST00000514495.1;ENST00000515399.4;ENST00000357591.2;ENST00000507044.1;ENST00000514984.1;ENST00000578730.1;ENST00000581398.1
cg16495212	CPEB1	15	83317306	NA		0.536649	0.268207	-0.268442	-0.289643	8.9301e-36	2.8433e-32	FALSE	protein_coding;protein_coding;protein_coding;protein_coding;protein_coding;protein_coding;protein_coding;antisense;antisense	ENST00000563519.1;ENST00000566716.1;ENST00000567678.1;ENST00000569257.4;ENST00000615198.3;ENST00000617522.3;ENST00000620182.3;ENST00000560650.1;ENST00000618020.1
cg16513459	KCNAB3	17	7832932	NA	N_Shore	0.774206	0.0662936	-0.707913	-0.625806	5.96076e-39	2.71696e-35	FALSE	protein_coding;protein_coding;protein_coding;protein_coding	ENST00000303790.2;ENST00000570587.4;ENST00000570852.1;ENST00000573621.1
cg16524733	TAGLN;TAGLN;TAGLN;TAGLN	11	117070046	NA	Island	0.584285	0.131831	-0.452455	-0.384089	8.83876e-21	4.79017e-18	FALSE	protein_coding;protein_coding;protein_coding;protein_coding	ENST00000278968.9;ENST00000392951.7;ENST00000525531.4;ENST00000529792.4
cg16530165	NPPC	2	232792397	NA	N_Shore	0.667471	0.424798	-0.242673	-0.270073	2.05096e-28	2.79277e-25	FALSE	protein_coding;protein_coding	ENST00000295440.2;ENST00000409852.1
cg16601359		12	2955294	TRUE		0.478775	0.135222	-0.343554	-0.255026	9.43618e-25	8.42482e-22	FALSE	protein_coding	ENST00000537710.4
cg16661761	LOXL2	8	23162383	NA		0.662866	0.333179	-0.329687	-0.369393	4.51026e-20	2.19441e-17	FALSE	protein_coding	ENST00000389131.6
cg16673929	NFIX	19	13134830	TRUE	Island	0.204539	0.0604208	-0.144118	-0.191521	2.60124e-19	1.13891e-16	FALSE	protein_coding;protein_coding;protein_coding;protein_coding;protein_coding;protein_coding;protein_coding;protein_coding;protein_coding;protein_coding;protein_coding;protein_coding;protein_coding	ENST00000358552.6;ENST00000360105.7;ENST00000397661.5;ENST00000585382.4;ENST00000585575.4;ENST00000586797.4;ENST00000586873.1;ENST00000587260.1;ENST00000587760.4;ENST00000588228.4;ENST00000590027.1;ENST00000591028.1;ENST00000592199.4
cg16731083		1	203086962	NA		0.424595	0.235724	-0.188871	-0.188519	7.68805e-20	3.59122e-17	FALSE	protein_coding	ENST00000309502.6
cg16744741	PRKG2	4	82126025	NA		0.47394	0.887443	0.413504	0.346903	1.08517e-15	2.78046e-13	FALSE	protein_coding;protein_coding;protein_coding	ENST00000264399.4;ENST00000395578.2;ENST00000628926.1
cg16761096	COBL	7	51383119	NA		0.816106	0.547729	-0.268376	-0.349102	8.49779e-30	1.31889e-26	FALSE	protein_coding;protein_coding;protein_coding;protein_coding;protein_coding	ENST00000265136.10;ENST00000395540.5;ENST00000395542.5;ENST00000441453.4;ENST00000449281.1
cg16848873	HOXB-AS3;HOXB-AS3;HOXB6;HOXB6	17	46682308	NA	N_Shore	0.641961	0.323226	-0.318735	-0.592321	3.76944e-31	6.71702e-28	FALSE	antisense;antisense;antisense;antisense;antisense;protein_coding;protein_coding;protein_coding;protein_coding	ENST00000466037.5;ENST00000467155.5;ENST00000487849.6;ENST00000491264.4;ENST00000494420.1;ENST00000552000.2;ENST00000225648.3;ENST00000484302.3;ENST00000490419.1
cg16954004	RAB6B	3	133613567	NA	S_Shore	0.491097	0.320169	-0.170928	-0.16945	1.00958e-24	8.9583e-22	FALSE	protein_coding;protein_coding;protein_coding;protein_coding;protein_coding;protein_coding;protein_coding	ENST00000285208.7;ENST00000460865.3;ENST00000469959.1;ENST00000477759.4;ENST00000486858.4;ENST00000488969.1;ENST00000543906.4
cg16968885	COL11A1;COL11A1;COL11A1;COL11A1	1	103574619	TRUE	Island	0.837034	0.4989	-0.338134	-0.39118	1.69289e-23	1.29973e-20	FALSE	protein_coding;protein_coding;protein_coding;protein_coding;protein_coding	ENST00000353414.7;ENST00000358392.5;ENST00000370096.6;ENST00000427239.4;ENST00000512756.4
cg16980380		17	78417883	TRUE	S_Shore	0.600012	0.205267	-0.394745	-0.398473	3.26511e-20	1.62699e-17	FALSE	.	.
cg16983588	PRDM10;PRDM10;PRDM10;PRDM10	11	129793108	NA	N_Shore	0.516917	0.886037	0.369119	0.28818	3.57958e-21	2.06946e-18	FALSE	protein_coding;protein_coding;protein_coding;protein_coding;protein_coding;protein_coding;protein_coding	ENST00000304538.9;ENST00000358825.8;ENST00000360871.6;ENST00000423662.5;ENST00000526082.4;ENST00000528746.4;ENST00000533431.1
cg17024919	ZNF385D	3	21792248	TRUE	N_Shelf	0.270149	0.106969	-0.16318	-0.214459	4.92765e-14	9.63758e-12	FALSE	protein_coding;protein_coding;protein_coding;protein_coding;protein_coding	ENST00000281523.5;ENST00000446749.1;ENST00000478967.4;ENST00000494108.1;ENST00000494118.4
cg17033854		17	37758493	TRUE	N_Shore	0.390127	0.235365	-0.154763	-0.141742	1.13635e-14	2.48515e-12	FALSE	.	.
cg17105139	LBX2-AS1;LBX2	2	74729279	NA	N_Shore	0.64693	0.284098	-0.362832	-0.372445	4.71562e-26	4.80458e-23	FALSE	protein_coding;protein_coding;protein_coding;antisense;antisense;antisense	ENST00000341396.2;ENST00000460508.3;ENST00000550249.2;ENST00000548978.2;ENST00000603175.1;ENST00000606287.1
cg17156491		2	43259508	TRUE	Island	0.42799	0.671054	0.243065	0.172407	1.76778e-12	2.64506e-10	FALSE	lincRNA	ENST00000422351.4
cg17163527	MEGF6	1	3447348	TRUE		0.251707	0.730885	0.479178	0.489791	3.70114e-31	6.62257e-28	FALSE	protein_coding;protein_coding;protein_coding	ENST00000294599.7;ENST00000356575.7;ENST00000485002.5
cg17178468		17	43049442	TRUE	Island	0.363115	0.15429	-0.208825	-0.286997	3.49557e-38	1.45543e-34	FALSE	.	.
cg17179862	HOXB-AS3;HOXB-AS3;HOXB6	17	46681362	NA	Island	0.587075	0.0456437	-0.541431	-0.647099	4.32814e-51	8.51892e-47	FALSE	antisense;antisense;antisense;antisense;antisense;protein_coding;protein_coding;protein_coding;protein_coding	ENST00000466037.5;ENST00000467155.5;ENST00000487849.6;ENST00000491264.4;ENST00000494420.1;ENST00000552000.2;ENST00000225648.3;ENST00000484302.3;ENST00000490419.1
cg17204652	ECEL1P2	2	233252706	NA		0.737809	0.153384	-0.584425	-0.608018	1.94338e-45	1.75317e-41	FALSE	transcribed_unprocessed_pseudogene;transcribed_unprocessed_pseudogene	ENST00000461596.1;ENST00000465689.1
cg17226286		12	130529673	TRUE		0.435684	0.267804	-0.167881	-0.171049	2.87549e-15	6.92129e-13	FALSE	lincRNA;lincRNA	ENST00000567788.1;ENST00000561864.1
cg17239103	CFAP45	1	159870074	TRUE		0.510967	0.257122	-0.253846	-0.30042	7.42422e-24	6.03156e-21	FALSE	protein_coding;protein_coding;protein_coding;miRNA	ENST00000368099.7;ENST00000476696.4;ENST00000479940.2;ENST00000584466.1
cg17249170	EMX2;EMX2;EMX2OS	10	119305798	TRUE	N_Shore	0.295116	0.205319	-0.0897972	-0.123396	1.79597e-23	1.36917e-20	FALSE	protein_coding;protein_coding;protein_coding;protein_coding;antisense	ENST00000442245.5;ENST00000546446.2;ENST00000553456.4;ENST00000616794.1;ENST00000551288.4
cg17255063	PHOX2B	4	41751830	NA	S_Shore	0.336884	0.224428	-0.112455	-0.112596	2.40269e-20	1.21685e-17	FALSE	protein_coding;antisense;lincRNA	ENST00000226382.3;ENST00000508038.1;ENST00000510602.1
cg17272843	KCTD14	11	77734280	NA		0.185045	0.0844427	-0.100603	-0.101281	5.93241e-13	9.67912e-11	FALSE	protein_coding;protein_coding;protein_coding;protein_coding;protein_coding;protein_coding;antisense	ENST00000353172.5;ENST00000533144.1;ENST00000612612.3;ENST00000614236.1;ENST00000528251.1;ENST00000530054.1;ENST00000526730.1
cg17279839	RARRES2	7	150038598	NA	N_Shore	0.333722	0.0750939	-0.258628	-0.351469	2.20798e-29	3.26313e-26	FALSE	protein_coding;protein_coding;protein_coding;protein_coding;protein_coding;sense_overlapping	ENST00000223271.6;ENST00000466675.4;ENST00000467793.4;ENST00000478771.2;ENST00000482669.1;ENST00000563946.1
cg17295878	TBC1D16	17	77924665	NA		0.798703	0.188992	-0.609711	-0.580047	5.36357e-23	3.77033e-20	FALSE	protein_coding;protein_coding;protein_coding;protein_coding;protein_coding;protein_coding;protein_coding;protein_coding;protein_coding	ENST00000310924.5;ENST00000340848.10;ENST00000570373.4;ENST00000571872.1;ENST00000572862.4;ENST00000573782.4;ENST00000574241.5;ENST00000574427.1;ENST00000576768.4
cg17301216	MIR9-3HG	15	89920348	NA	S_Shore	0.374896	0.102704	-0.272192	-0.24288	4.0165e-09	3.04112e-07	FALSE	lincRNA;lincRNA;lincRNA;lincRNA;lincRNA;lincRNA;lincRNA;lincRNA;lincRNA	ENST00000536780.5;ENST00000538734.5;ENST00000558692.4;ENST00000558754.4;ENST00000559235.4;ENST00000560008.4;ENST00000560596.4;ENST00000560663.4;ENST00000561327.4
cg17310258		11	31847173	NA	N_Shore	0.549555	0.321687	-0.227868	-0.206559	1.13034e-23	8.89923e-21	TRUE	lincRNA;protein_coding;protein_coding;protein_coding	ENST00000630360.1;ENST00000506388.2;ENST00000530348.4;ENST00000532942.4
cg17329393	FRY	13	32820875	TRUE	Island	0.835788	0.600968	-0.23482	-0.242404	7.13714e-19	2.94334e-16	FALSE	protein_coding;protein_coding	ENST00000380250.6;ENST00000542859.4
cg17342071	COPS9;COPS9	2	241076416	NA	N_Shore	0.290841	0.487522	0.196681	0.295396	2.46705e-20	1.24508e-17	FALSE	protein_coding;protein_coding;protein_coding;protein_coding	ENST00000307266.6;ENST00000403160.4;ENST00000489698.1;ENST00000607357.1
cg17385483		12	49734595	TRUE	S_Shore	0.475455	0.215504	-0.259951	-0.323539	2.09506e-28	2.835e-25	FALSE	.	.
cg17430979	JAKMIP1	4	6034828	NA	N_Shore	0.5532	0.874634	0.321433	0.351858	3.86415e-15	9.11355e-13	FALSE	protein_coding;protein_coding	ENST00000409021.6;ENST00000409371.6
cg17431739	MSRB2	10	23384047	NA	Island	0.309194	0.50767	0.198476	0.216535	1.44043e-24	1.25247e-21	FALSE	protein_coding	ENST00000376510.6
cg17453840	CPEB1	15	83317526	NA	Island	0.879505	0.24066	-0.638845	-0.648524	2.48014e-46	2.68486e-42	FALSE	protein_coding;protein_coding;protein_coding;protein_coding;protein_coding;protein_coding;antisense;antisense	ENST00000563519.1;ENST00000566716.1;ENST00000567678.1;ENST00000615198.3;ENST00000617522.3;ENST00000620182.3;ENST00000560650.1;ENST00000618020.1
cg17465304	KIF12	9	116861442	NA		0.759291	0.471133	-0.288157	-0.318298	2.12779e-19	9.42882e-17	FALSE	protein_coding;protein_coding;protein_coding;protein_coding	ENST00000374118.6;ENST00000468460.1;ENST00000473174.1;ENST00000491059.1
cg17471939	TP73	1	3600879	NA	S_Shore	0.454859	0.0582521	-0.396607	-0.210213	2.92328e-10	2.86194e-08	TRUE	protein_coding;protein_coding;protein_coding;protein_coding;protein_coding;protein_coding;protein_coding	ENST00000346387.7;ENST00000354437.7;ENST00000357733.6;ENST00000378295.7;ENST00000603362.4;ENST00000604074.4;ENST00000604479.4
cg17501828	MIR1977	1	567358	NA		0.323454	0.246099	-0.0773554	-0.208514	7.52707e-19	3.09237e-16	FALSE	.	.
cg17571266	ZNF385A;ZNF385A;ZNF385A	12	54763211	NA	Island	0.674159	0.176377	-0.497782	-0.489539	5.03787e-30	8.10962e-27	FALSE	antisense;antisense;protein_coding;protein_coding;protein_coding;protein_coding;protein_coding;protein_coding	ENST00000550474.4;ENST00000552785.1;ENST00000338010.8;ENST00000352268.9;ENST00000394313.5;ENST00000546970.4;ENST00000550779.4;ENST00000551109.4
cg17588800	GLI3	7	42278067	NA		0.282515	0.111566	-0.170949	-0.132585	6.45278e-14	1.24185e-11	FALSE	protein_coding;protein_coding;protein_coding	ENST00000395925.6;ENST00000428534.1;ENST00000437480.1
cg17610169		11	10750973	NA		0.930909	0.559003	-0.371906	-0.363146	3.095e-28	4.09845e-25	FALSE	.	.
cg17641252	PLEK2	14	67878535	NA	S_Shore	0.615683	0.350011	-0.265672	-0.295133	1.31103e-17	4.46208e-15	FALSE	protein_coding;protein_coding;protein_coding	ENST00000216446.7;ENST00000553387.1;ENST00000557388.1
cg17696044	SHANK2;SHANK2	11	70449316	TRUE	Island	0.211178	0.813269	0.602091	0.550839	1.96039e-36	6.79106e-33	FALSE	TEC;protein_coding;protein_coding;protein_coding;protein_coding;protein_coding;protein_coding;protein_coding;protein_coding;protein_coding;protein_coding;protein_coding	ENST00000624018.1;ENST00000338508.7;ENST00000357171.6;ENST00000409161.4;ENST00000409530.4;ENST00000412252.4;ENST00000423696.5;ENST00000426687.2;ENST00000445654.2;ENST00000449116.5;ENST00000449833.5;ENST00000601538.4
cg17696194	DTX4	11	58941051	NA		0.470644	0.226887	-0.243757	-0.283205	1.2775e-20	6.73788e-18	FALSE	protein_coding;protein_coding	ENST00000227451.3;ENST00000532982.4
cg17713673		12	46466053	TRUE	Island	0.20532	0.502553	0.297232	0.240047	1.15785e-21	7.09152e-19	FALSE	.	.
cg17791651	POU3F1	1	38513489	NA	Island	0.501674	0.198394	-0.30328	-0.257459	1.02e-25	1.00154e-22	FALSE	protein_coding;lincRNA;lincRNA	ENST00000373012.3;ENST00000428151.1;ENST00000432922.4
cg17792740	AGAP11;ADIRF	10	88729315	TRUE	S_Shore	0.696781	0.484985	-0.211796	-0.276761	1.68088e-20	8.68559e-18	FALSE	protein_coding;protein_coding;protein_coding;processed_transcript;processed_transcript;processed_transcript;processed_transcript;protein_coding;protein_coding	ENST00000372013.6;ENST00000416348.1;ENST00000561504.1;ENST00000418273.2;ENST00000440490.1;ENST00000609111.1;ENST00000433214.2;ENST00000474994.2;ENST00000609457.4
cg17802213	DGKG;DGKG;DGKG	3	185911316	TRUE	S_Shore	0.544266	0.248602	-0.295664	-0.298825	4.53606e-19	1.93517e-16	FALSE	protein_coding;protein_coding;protein_coding;protein_coding;protein_coding	ENST00000265022.6;ENST00000344484.7;ENST00000382164.7;ENST00000480809.4;ENST00000490452.4
cg17808882	FGF20	8	16859924	NA	S_Shore	0.375017	0.138778	-0.236239	-0.236908	4.69168e-22	2.97015e-19	FALSE	protein_coding;protein_coding	ENST00000180166.5;ENST00000519941.1
cg17888985		10	126898290	TRUE	Island	0.244282	0.104922	-0.139361	-0.180909	2.65035e-22	1.73361e-19	FALSE	.	.
cg17906007	RASD2	22	35944645	TRUE		0.650951	0.458764	-0.192186	-0.282208	1.29362e-19	5.86557e-17	FALSE	protein_coding	ENST00000216127.4
cg17918558		1	46945595	TRUE		0.663339	0.260007	-0.403332	-0.450148	1.09393e-43	7.40145e-40	FALSE	lincRNA	ENST00000455247.1
cg17930194	LHX6;LHX6	9	124982834	NA	Island	0.336575	0.0269484	-0.309627	-0.366545	4.47379e-73	1.93723e-67	FALSE	protein_coding;protein_coding;protein_coding;protein_coding;protein_coding;protein_coding;protein_coding;protein_coding	ENST00000340587.6;ENST00000373754.5;ENST00000373755.5;ENST00000394319.7;ENST00000541397.2;ENST00000558672.1;ENST00000559895.4;ENST00000560152.1
cg17945323	SLC22A8	11	62767406	NA	Island	0.234039	0.832958	0.598919	0.496088	3.80417e-30	6.21613e-27	FALSE	protein_coding;protein_coding;protein_coding;protein_coding;protein_coding;protein_coding;protein_coding;protein_coding	ENST00000311438.11;ENST00000336232.5;ENST00000430500.5;ENST00000535878.4;ENST00000539841.1;ENST00000542795.4;ENST00000542904.1;ENST00000545207.4
cg17964844		12	49367911	NA	S_Shore	0.241587	0.0876524	-0.153934	-0.137169	1.17903e-07	6.06198e-06	FALSE	snRNA	ENST00000363433.1
cg17980119	PLCD4	2	219472607	TRUE	S_Shore	0.648576	0.261361	-0.387215	-0.412107	4.07616e-38	1.66514e-34	FALSE	protein_coding;protein_coding;protein_coding;protein_coding;protein_coding;protein_coding;protein_coding;protein_coding;protein_coding	ENST00000415854.4;ENST00000417849.4;ENST00000444453.4;ENST00000446503.4;ENST00000450993.5;ENST00000465713.4;ENST00000469493.4;ENST00000473443.4;ENST00000483685.4
cg18033416	RHBDL3	17	30592033	NA	N_Shore	0.63366	0.244387	-0.389273	-0.378173	6.03092e-31	1.04879e-27	FALSE	protein_coding;protein_coding;protein_coding;protein_coding	ENST00000269051.7;ENST00000431505.5;ENST00000538145.4;ENST00000578006.4
cg18038207		12	80581062	TRUE	S_Shore	0.489465	0.907327	0.417862	0.344118	9.97002e-09	6.86686e-07	FALSE	.	.
cg18062205	KCNG1	20	49630819	TRUE		0.564855	0.451976	-0.11288	-0.365609	4.35389e-25	3.94417e-22	FALSE	protein_coding;protein_coding;protein_coding;protein_coding;protein_coding	ENST00000371571.4;ENST00000424171.4;ENST00000433903.4;ENST00000439216.4;ENST00000447736.1
cg18147098		1	212688916	NA	N_Shore	0.756315	0.418997	-0.337318	-0.409481	1.60736e-31	3.01306e-28	FALSE	.	.
cg18163342	CEP170B;CEP170B	14	105332627	NA	Island	0.597088	0.403302	-0.193786	-0.188297	1.09007e-11	1.40818e-09	FALSE	protein_coding;protein_coding;protein_coding	ENST00000414716.6;ENST00000453495.2;ENST00000556508.4
cg18248586	DRD2;DRD2	11	113329026	TRUE	N_Shelf	0.471995	0.75905	0.287055	0.272102	1.89562e-18	7.32237e-16	FALSE	protein_coding;protein_coding;protein_coding;protein_coding	ENST00000346454.6;ENST00000362072.6;ENST00000540600.4;ENST00000542616.1
cg18290775	PLEKHD1	14	69954135	NA	N_Shore	0.708006	0.315064	-0.392943	-0.444532	1.47843e-45	1.42264e-41	FALSE	protein_coding;protein_coding	ENST00000322564.8;ENST00000556123.1
cg18318818	CACNA1G;CACNA1G;CACNA1G;CACNA1G;CACNA1G;CACNA1G;CACNA1G;CACNA1G;CACNA1G;CACNA1G;CACNA1G;CACNA1G;CACNA1G;CACNA1G;CACNA1G	17	48640257	NA	S_Shelf	0.510441	0.244055	-0.266387	-0.271334	3.23488e-18	1.20865e-15	FALSE	protein_coding;protein_coding;protein_coding;protein_coding;protein_coding;protein_coding;protein_coding;protein_coding;protein_coding;protein_coding;protein_coding;protein_coding;protein_coding;protein_coding;protein_coding;protein_coding;protein_coding;protein_coding;protein_coding;protein_coding;protein_coding;protein_coding;protein_coding;protein_coding;protein_coding;protein_coding;protein_c…	ENST00000352832.8;ENST00000354983.7;ENST00000358244.8;ENST00000359106.8;ENST00000360761.7;ENST00000416767.7;ENST00000429973.5;ENST00000442258.5;ENST00000502264.4;ENST00000503436.4;ENST00000503485.4;ENST00000503607.4;ENST00000504076.4;ENST00000505165.4;ENST00000506406.4;ENST00000507336.4;ENST00000507510.5;ENST00000507609.4;ENST00000507896.4;ENST00000510115.4;ENST00000510366.4;ENST00000511765.4;ENS…
cg18365406	PLPPR2;PLPPR2	19	11472110	TRUE		0.922093	0.505946	-0.416148	-0.398537	5.38008e-26	5.45591e-23	FALSE	protein_coding;protein_coding;protein_coding;protein_coding	ENST00000251473.8;ENST00000587801.4;ENST00000588360.1;ENST00000591608.1
cg18369516	ZBTB46	20	62406721	TRUE		0.44835	0.0353705	-0.41298	-0.308596	5.243e-41	2.94846e-37	FALSE	protein_coding;protein_coding;protein_coding;protein_coding	ENST00000245663.7;ENST00000302995.2;ENST00000395104.4;ENST00000460757.1
cg18394552		5	159428643	TRUE	S_Shore	0.662789	0.926657	0.263867	0.251544	1.36526e-06	4.94836e-05	FALSE	.	.
cg18401406	SERTM1	13	37247537	NA	Island	0.837495	0.625797	-0.211698	-0.28689	3.21347e-22	2.06453e-19	FALSE	protein_coding	ENST00000315190.3
cg18402261		17	48021977	NA	N_Shore	0.364652	0.244941	-0.119711	-0.146246	6.8355e-24	5.58471e-21	FALSE	.	.
cg18442187	TFAP2B	6	50794722	NA	Island	0.183993	0.0830657	-0.100928	-0.109401	5.86764e-17	1.81226e-14	FALSE	protein_coding;protein_coding	ENST00000344788.6;ENST00000393655.3
cg18462381	FOXI2	10	129536718	NA		0.81407	0.288935	-0.525135	-0.542191	6.43868e-55	1.88354e-50	FALSE	protein_coding;TEC	ENST00000388920.4;ENST00000623953.1
cg18486590	HSPA2;HSPA2	14	65009505	NA	Island	0.489508	0.26232	-0.227188	-0.14652	5.62622e-12	7.65395e-10	FALSE	protein_coding;protein_coding	ENST00000247207.6;ENST00000394709.2
cg18500300	NACAD	7	45128199	NA		0.486356	0.275906	-0.21045	-0.205203	5.83576e-16	1.55221e-13	FALSE	protein_coding	ENST00000490531.2
cg18507732		14	65345681	NA		0.553289	0.229875	-0.323414	-0.312637	1.57406e-22	1.047e-19	FALSE	protein_coding	ENST00000556626.4
cg18515624	GAREM1	18	30049316	NA	N_Shelf	0.150669	0.0806802	-0.0699888	-0.0975202	9.07206e-18	3.16294e-15	FALSE	protein_coding;protein_coding	ENST00000269209.6;ENST00000399218.7
cg18517369		2	231899207	NA		0.595788	0.839821	0.244032	0.275458	2.61218e-21	1.52033e-18	FALSE	.	.
cg18533225	KLHDC7B	22	50986813	NA	S_Shore	0.458451	0.201814	-0.256637	-0.271833	3.25002e-25	3.02e-22	FALSE	protein_coding	ENST00000395676.3
cg18556455		2	45178474	NA	N_Shore	0.825283	0.461589	-0.363694	-0.412434	4.05257e-33	9.09241e-30	FALSE	.	.
cg18574813	PDE2A;PDE2A	11	72381308	TRUE	Island	0.563226	0.313198	-0.250028	-0.378914	2.99616e-30	4.97084e-27	FALSE	protein_coding;protein_coding;protein_coding;protein_coding;protein_coding;protein_coding;protein_coding	ENST00000334456.8;ENST00000418754.5;ENST00000535701.1;ENST00000540345.4;ENST00000540380.4;ENST00000542969.2;ENST00000546038.1
cg18598117	ARID3A	19	941126	TRUE	N_Shore	0.216796	0.832624	0.615828	0.702819	4.32241e-26	4.43527e-23	FALSE	protein_coding;protein_coding;protein_coding	ENST00000263620.6;ENST00000457152.3;ENST00000587532.4
cg18604939		12	66455689	TRUE	N_Shore	0.337264	0.799635	0.462371	0.315797	1.75471e-18	6.79018e-16	FALSE	.	.
cg18623216	PLCH1;PLCH1	3	155421970	TRUE		0.273203	0.666376	0.393173	0.410566	8.73912e-19	3.55324e-16	FALSE	protein_coding;protein_coding	ENST00000334686.6;ENST00000460012.4
cg18643029	C14orf93;C14orf93;C14orf93	14	23464310	TRUE		0.482721	0.714641	0.231921	0.153183	7.96123e-11	8.74519e-09	FALSE	protein_coding;protein_coding;protein_coding;protein_coding;protein_coding;antisense;antisense	ENST00000299088.9;ENST00000341470.7;ENST00000397377.4;ENST00000397379.6;ENST00000397382.7;ENST00000555294.1;ENST00000556503.4
cg18755942	FOXL2;FOXL2NB	3	138666719	NA	N_Shore	0.879195	0.610091	-0.269104	-0.292811	6.56015e-33	1.43468e-29	FALSE	protein_coding;protein_coding;protein_coding;protein_coding	ENST00000330315.3;ENST00000383165.3;ENST00000470680.4;ENST00000498709.1
cg18773260	HOXB7	17	46685292	NA	S_Shore	0.595838	0.16877	-0.427068	-0.323178	1.46763e-25	1.42491e-22	FALSE	protein_coding;protein_coding;protein_coding	ENST00000239165.8;ENST00000467314.1;ENST00000567101.2
cg18778196	SMAD6;SMAD6;SMAD6	15	67054877	TRUE	N_Shelf	0.229243	0.808241	0.578998	0.546441	1.49215e-28	2.05773e-25	FALSE	protein_coding;protein_coding;protein_coding	ENST00000288840.8;ENST00000557916.4;ENST00000559931.4
cg18778959	FZD4	11	86665815	NA	Island	0.155455	0.0742647	-0.0811903	-0.108311	1.1663e-16	3.44966e-14	FALSE	protein_coding;lincRNA;lincRNA	ENST00000531380.1;ENST00000499504.6;ENST00000531827.1
cg18877667	DLX4;DLX4	17	48051089	NA	S_Shore	0.631782	0.437517	-0.194265	-0.269281	7.42356e-24	6.03156e-21	FALSE	protein_coding;protein_coding;protein_coding;protein_coding	ENST00000240306.4;ENST00000411890.3;ENST00000503276.2;ENST00000611342.1
cg18887458		7	115995934	TRUE	Island	0.358137	0.872727	0.51459	0.379622	1.50249e-10	1.55662e-08	FALSE	antisense;protein_coding;protein_coding;protein_coding;protein_coding;protein_coding;protein_coding;protein_coding;protein_coding	ENST00000446355.2;ENST00000462876.4;ENST00000467035.4;ENST00000472470.4;ENST00000477018.4;ENST00000478226.4;ENST00000484871.4;ENST00000485561.4;ENST00000498493.4
cg18931977		1	228567311	NA	N_Shore	0.555983	0.387518	-0.168465	-0.208953	1.38584e-12	2.10707e-10	FALSE	.	.
cg18942298	JPH2;JPH2	20	42809578	TRUE	Island	0.459382	0.212927	-0.246455	-0.343294	2.79351e-37	1.05186e-33	FALSE	protein_coding;protein_coding	ENST00000342272.3;ENST00000372980.3
cg18957138	KLF9	9	73027331	NA	N_Shore	0.0289084	0.259424	0.230515	0.247709	1.41645e-44	1.09527e-40	FALSE	protein_coding	ENST00000377126.3
cg18969008	HPCAL1;HPCAL1	2	10445016	NA	N_Shore	0.739397	0.889916	0.150519	0.168555	1.18479e-09	1.0137e-07	FALSE	protein_coding;protein_coding;protein_coding	ENST00000307845.6;ENST00000381765.6;ENST00000423674.4
cg19005955	FSTL4	5	132938694	TRUE		0.234173	0.0868838	-0.147289	-0.171021	9.14509e-20	4.23076e-17	TRUE	protein_coding;protein_coding	ENST00000265342.10;ENST00000621681.3
cg19021383	MAPK8IP1	11	45922184	NA		0.514667	0.130645	-0.384022	-0.331775	1.40679e-19	6.36539e-17	FALSE	protein_coding;protein_coding;protein_coding	ENST00000241014.5;ENST00000395629.2;ENST00000497090.1
cg19022697	TTC22	1	55247140	TRUE	N_Shore	0.756177	0.0554815	-0.700696	-0.736021	9.90473e-64	7.14821e-59	FALSE	protein_coding	ENST00000371276.7
cg19022717	LRRC71	1	156894534	NA	Island	0.785541	0.58281	-0.202731	-0.345062	3.86994e-38	1.59596e-34	FALSE	protein_coding;protein_coding	ENST00000337428.7;ENST00000490146.4
cg19057899	IGF2BP1;IGF2BP1	17	47093955	NA	S_Shelf	0.613335	0.844669	0.231334	0.251882	8.87034e-21	4.80127e-18	FALSE	protein_coding;protein_coding;protein_coding;protein_coding	ENST00000290341.6;ENST00000431824.2;ENST00000499130.5;ENST00000515586.4
cg19080839	SMARCD3;SMARCD3;SMARCD3	7	150939592	NA		0.678543	0.319031	-0.359512	-0.353792	1.2166e-39	6.19774e-36	FALSE	protein_coding;protein_coding;protein_coding;protein_coding;protein_coding;protein_coding;protein_coding;protein_coding;protein_coding;protein_coding;protein_coding;protein_coding	ENST00000262188.11;ENST00000356800.5;ENST00000392811.5;ENST00000460431.1;ENST00000469154.4;ENST00000470588.1;ENST00000472103.4;ENST00000472988.4;ENST00000477169.4;ENST00000485592.4;ENST00000485610.4;ENST00000489503.4
cg19092981	TBX1;TBX1;TBX1	22	19751654	TRUE	Island	0.64622	0.122389	-0.523831	-0.731657	8.57387e-34	2.1337e-30	FALSE	protein_coding;protein_coding;protein_coding;protein_coding;protein_coding	ENST00000329705.10;ENST00000332710.7;ENST00000359500.6;ENST00000484336.1;ENST00000621939.1
cg19184897		12	58282506	TRUE	Island	0.288541	0.552545	0.264004	0.21118	2.63027e-09	2.07952e-07	FALSE	lincRNA;lincRNA	ENST00000499481.2;ENST00000548955.1
cg19220719		10	77532329	NA		0.236707	0.654785	0.418077	0.468922	3.83956e-28	4.97784e-25	FALSE	protein_coding;protein_coding;protein_coding	ENST00000593699.4;ENST00000593817.1;ENST00000611255.3
cg19227031	PRRT1	6	32118315	NA	S_Shore	0.615601	0.205931	-0.40967	-0.445311	4.35603e-30	7.03821e-27	FALSE	protein_coding;protein_coding;protein_coding;protein_coding;protein_coding;protein_coding	ENST00000211413.8;ENST00000375150.5;ENST00000428778.4;ENST00000467780.4;ENST00000472641.1;ENST00000495191.4
cg19270739		1	1368846	TRUE	S_Shore	0.432273	0.775376	0.343102	0.296016	9.16333e-12	1.20421e-09	FALSE	lincRNA;lincRNA;lincRNA;protein_coding	ENST00000417917.1;ENST00000430109.1;ENST00000454562.1;ENST00000495558.1
cg19279257	SLC12A9;TRIP6	7	100463508	NA	N_Shelf	0.503194	0.969501	0.466307	0.381899	5.58506e-07	2.32117e-05	FALSE	protein_coding;protein_coding;protein_coding;protein_coding;protein_coding;protein_coding	ENST00000354161.6;ENST00000467972.4;ENST00000475687.4;ENST00000487651.4;ENST00000200457.7;ENST00000629911.1
cg19400163	TLE2;TLE2;TLE2	19	3029785	NA	Island	0.70089	0.597831	-0.103059	-0.325498	8.94892e-16	2.32178e-13	FALSE	protein_coding;protein_coding;protein_coding;protein_coding;protein_coding;protein_coding;protein_coding;protein_coding;protein_coding;protein_coding;protein_coding;protein_coding;protein_coding	ENST00000262953.9;ENST00000426948.5;ENST00000443826.6;ENST00000455444.5;ENST00000586422.4;ENST00000587137.4;ENST00000590101.4;ENST00000590536.4;ENST00000591457.4;ENST00000591529.4;ENST00000591720.1;ENST00000592305.4;ENST00000592584.1
cg19414967		8	49468296	TRUE	S_Shore	0.517417	0.217659	-0.299758	-0.393017	4.37465e-39	2.05902e-35	FALSE	lincRNA;antisense	ENST00000524011.1;ENST00000522575.1
cg19421125	LAG3	12	6882856	NA		0.273355	0.726757	0.453402	0.190523	2.2634e-07	1.06624e-05	FALSE	protein_coding;protein_coding;protein_coding	ENST00000203629.2;ENST00000441671.5;ENST00000538079.1
cg19433091	TMEM62	15	43426498	NA	N_Shore	0.209413	0.505001	0.295588	0.264369	1.68028e-19	7.55549e-17	FALSE	miRNA;protein_coding;protein_coding;protein_coding;protein_coding;protein_coding;protein_coding;protein_coding;protein_coding;protein_coding;protein_coding;protein_coding	ENST00000627122.1;ENST00000570199.1;ENST00000260403.5;ENST00000564494.1;ENST00000564698.4;ENST00000565291.4;ENST00000567441.4;ENST00000568182.4;ENST00000568197.1;ENST00000569535.4;ENST00000569926.4;ENST00000570109.1
cg19449917		3	156823356	TRUE	S_Shore	0.403884	0.163402	-0.240482	-0.27489	1.83961e-19	8.2377e-17	FALSE	lincRNA	ENST00000471357.1
cg19496364		8	94551463	TRUE	N_Shelf	0.712628	0.334938	-0.377689	-0.400657	3.16154e-34	8.29698e-31	FALSE	antisense	ENST00000501400.1
cg19509778	FOXI2	10	129537308	NA	Island	0.607927	0.0546977	-0.55323	-0.507682	1.53412e-33	3.71119e-30	FALSE	protein_coding	ENST00000388920.4
cg19570321	HRASLS5;HRASLS5;HRASLS5	11	63258214	TRUE		0.503252	0.300591	-0.20266	-0.243751	5.82639e-15	1.32856e-12	FALSE	protein_coding;protein_coding;protein_coding;protein_coding;protein_coding;protein_coding	ENST00000301790.4;ENST00000394615.2;ENST00000536887.4;ENST00000538712.1;ENST00000539221.4;ENST00000540857.4
cg19579216	NAGS;PYY	17	42081856	NA		0.22919	0.101589	-0.127601	-0.137313	1.27835e-26	1.40139e-23	FALSE	protein_coding;protein_coding;protein_coding	ENST00000293404.6;ENST00000589767.1;ENST00000360085.5
cg19612068		6	33130024	TRUE	S_Shore	0.417113	0.656572	0.239459	0.219431	8.45492e-18	2.96448e-15	FALSE	.	.
cg19657174	TBX1;TBX1;TBX1	22	19746268	TRUE	N_Shelf	0.305007	0.0410739	-0.263933	-0.337928	1.11457e-17	3.84566e-15	FALSE	protein_coding;protein_coding;protein_coding;protein_coding	ENST00000329705.10;ENST00000332710.7;ENST00000359500.6;ENST00000621939.1
cg19659741	ADAM5	8	39172099	NA	S_Shore	0.695352	0.334513	-0.360839	-0.427265	3.66984e-20	1.8058e-17	TRUE	unitary_pseudogene;unitary_pseudogene;unitary_pseudogene;unitary_pseudogene;unitary_pseudogene;unitary_pseudogene;unitary_pseudogene;unitary_pseudogene;unitary_pseudogene	ENST00000359790.8;ENST00000399789.5;ENST00000417441.5;ENST00000433441.5;ENST00000464901.4;ENST00000497773.4;ENST00000505455.4;ENST00000512764.4;ENST00000519063.5
cg19695978		15	70877381	TRUE	Island	0.615328	0.413042	-0.202286	-0.211945	1.84714e-22	1.22113e-19	FALSE	lincRNA	ENST00000630447.1
cg19727499	PPFIA3	19	49628740	NA	Island	0.830567	0.658971	-0.171596	-0.239966	1.56213e-23	1.20665e-20	FALSE	protein_coding;protein_coding;protein_coding	ENST00000334186.7;ENST00000602509.4;ENST00000602655.4
cg19728382	STC2	5	172757276	NA		0.465498	0.297406	-0.168092	-0.182371	2.06263e-20	1.05449e-17	FALSE	protein_coding	ENST00000265087.7
cg19757382	COPS9;COPS9	2	241076313	NA	Island	0.164831	0.400061	0.23523	0.265959	7.03208e-19	2.90555e-16	FALSE	protein_coding;protein_coding;protein_coding;protein_coding	ENST00000307266.6;ENST00000403160.4;ENST00000489698.1;ENST00000607357.1
cg19830657		5	180597246	NA	S_Shore	0.164727	0.0667354	-0.097992	-0.0958805	3.80652e-08	2.26134e-06	FALSE	.	.
cg19837174		10	6389707	TRUE	S_Shore	0.443528	0.799641	0.356114	0.301812	4.29435e-07	1.85157e-05	FALSE	.	.
cg19869037	DSE;DSE	6	116732515	TRUE	N_Shore	0.529659	0.854481	0.324822	0.237772	3.78559e-12	5.32562e-10	FALSE	protein_coding;protein_coding;protein_coding;protein_coding;protein_coding	ENST00000331677.6;ENST00000359564.2;ENST00000430252.5;ENST00000452085.6;ENST00000606265.1
cg19870370	CRYL1	13	21010223	NA	Island	0.753353	0.442851	-0.310503	-0.289545	5.81101e-28	7.42263e-25	FALSE	protein_coding;protein_coding;protein_coding	ENST00000298248.10;ENST00000382812.4;ENST00000480748.2
cg19871388	SALL4	20	50419082	NA		0.571377	0.345166	-0.226211	-0.268218	5.27367e-19	2.21924e-16	FALSE	protein_coding;protein_coding;protein_coding;protein_coding	ENST00000217086.7;ENST00000371539.6;ENST00000395997.3;ENST00000483130.1
cg19922871		1	46913532	TRUE	S_Shore	0.32372	0.100259	-0.223462	-0.213182	9.65536e-24	7.65741e-21	FALSE	lincRNA	ENST00000416581.1
cg19981409	NOX4;NOX4;NOX4;NOX4	11	89225042	NA		0.402595	0.255966	-0.146629	-0.235827	4.05997e-19	1.74755e-16	FALSE	protein_coding;protein_coding;protein_coding;protein_coding;protein_coding;protein_coding;protein_coding;protein_coding;protein_coding;protein_coding;protein_coding;protein_coding;protein_coding;protein_coding	ENST00000263317.7;ENST00000343727.8;ENST00000375979.6;ENST00000393282.2;ENST00000424319.4;ENST00000525196.4;ENST00000525278.1;ENST00000527626.4;ENST00000527956.4;ENST00000528341.4;ENST00000529343.4;ENST00000531342.4;ENST00000532825.4;ENST00000534731.4
cg19994384		10	44436485	TRUE	N_Shelf	0.227985	0.493981	0.265996	0.19619	2.28976e-10	2.29092e-08	FALSE	lincRNA	ENST00000451929.1
cg20018563	SLCO3A1;SLCO3A1	15	92690264	TRUE		0.711911	0.458347	-0.253565	-0.209241	2.61159e-23	1.94641e-20	FALSE	protein_coding;protein_coding;protein_coding;protein_coding;protein_coding;protein_coding;protein_coding	ENST00000318445.9;ENST00000424469.2;ENST00000553653.4;ENST00000555210.1;ENST00000555549.4;ENST00000555769.4;ENST00000555892.4
cg20028470	UCN	2	27530829	NA		0.469427	0.280721	-0.188706	-0.159234	8.7521e-24	7.04427e-21	FALSE	protein_coding	ENST00000296099.2
cg20038219		7	73241729	NA	N_Shelf	0.275995	0.750464	0.474469	0.332146	1.80418e-16	5.2048e-14	FALSE	protein_coding;protein_coding;protein_coding;protein_coding	ENST00000431918.1;ENST00000435050.1;ENST00000466411.1;ENST00000476494.1
cg20068209	TMEM30A;TMEM30A	6	75988568	TRUE	Island	0.116019	0.539395	0.423377	0.389509	5.43586e-21	3.049e-18	FALSE	protein_coding;protein_coding;protein_coding	ENST00000230461.9;ENST00000475111.5;ENST00000518161.1
cg20075683	CCNI2	5	132083910	NA		0.79932	0.468458	-0.330863	-0.34636	7.78449e-27	8.73271e-24	FALSE	protein_coding;protein_coding;protein_coding	ENST00000378731.4;ENST00000492179.1;ENST00000614847.1
cg20076442		8	72745197	TRUE	Island	0.455112	0.808382	0.35327	0.452419	2.16303e-21	1.27433e-18	FALSE	miRNA;antisense	ENST00000390739.2;ENST00000521467.4
cg20094830	PRAC1;PRAC1;PRAC2	17	46799845	TRUE		0.224135	0.140951	-0.0831837	-0.0700186	6.34192e-07	2.58268e-05	FALSE	misc_RNA;misc_RNA;protein_coding;protein_coding;protein_coding	ENST00000613209.1;ENST00000612962.1;ENST00000290294.4;ENST00000422730.3;ENST00000432056.1
cg20118840		11	119928838	TRUE	S_Shore	0.659591	0.337979	-0.321612	-0.34401	1.32784e-40	7.18721e-37	FALSE	.	.
cg20221591	COPS9;COPS9	2	241076340	NA	Island	0.143773	0.407406	0.263634	0.341929	1.11533e-23	8.79708e-21	FALSE	protein_coding;protein_coding;protein_coding;protein_coding	ENST00000307266.6;ENST00000403160.4;ENST00000489698.1;ENST00000607357.1
cg20236750	LGI1	10	95516908	TRUE	N_Shore	0.592489	0.379624	-0.212865	-0.262018	9.2663e-32	1.75986e-28	FALSE	protein_coding;protein_coding;protein_coding;protein_coding;protein_coding;protein_coding;protein_coding;protein_coding;protein_coding	ENST00000371413.4;ENST00000371418.7;ENST00000478763.2;ENST00000627420.1;ENST00000627699.1;ENST00000629035.1;ENST00000630047.1;ENST00000630184.1;ENST00000630487.1
cg20263156	SCARA5	8	27850215	TRUE	Island	0.313289	0.178809	-0.13448	-0.108552	3.38919e-09	2.61415e-07	FALSE	protein_coding;protein_coding;protein_coding	ENST00000354914.6;ENST00000380385.5;ENST00000524352.4
cg20264732	ESRP2	16	68269763	NA	Island	0.313115	0.0879006	-0.225214	-0.196292	1.28716e-14	2.78849e-12	FALSE	protein_coding;protein_coding;protein_coding;protein_coding;protein_coding;protein_coding;protein_coding;protein_coding	ENST00000251366.6;ENST00000473183.5;ENST00000562567.5;ENST00000562724.1;ENST00000564382.4;ENST00000564465.1;ENST00000565858.4;ENST00000569964.4
cg20306574	FITM1	14	24601499	NA	S_Shore	0.733245	0.844775	0.111531	0.250308	2.52916e-14	5.22506e-12	FALSE	protein_coding;protein_coding	ENST00000267426.5;ENST00000559294.1
cg20322093	OTOP3	17	72931788	NA	N_Shore	0.473126	0.221781	-0.251345	-0.269631	4.36978e-24	3.63883e-21	FALSE	protein_coding;protein_coding;protein_coding	ENST00000626282.1;ENST00000328801.4;ENST00000580749.1
cg20343048	CLIC6	21	36041527	NA		0.344356	0.177932	-0.166424	-0.160089	1.46532e-24	1.27156e-21	FALSE	protein_coding;protein_coding	ENST00000349499.2;ENST00000360731.6
cg20388256	CNTFR;CNTFR	9	34588432	NA	Island	0.351271	0.29031	-0.0609615	-0.121197	8.61109e-19	3.51107e-16	FALSE	protein_coding;protein_coding;protein_coding;protein_coding	ENST00000351266.7;ENST00000378980.6;ENST00000417345.2;ENST00000610543.3
cg20413392	MIR219A2	9	131155013	NA		0.808044	0.468186	-0.339858	-0.310718	2.25885e-25	2.16399e-22	FALSE	lincRNA;miRNA	ENST00000608502.2;ENST00000385220.1
cg20462512	NTF3	12	5543155	TRUE		0.236977	0.0492428	-0.187734	-0.257923	2.1541e-29	3.1944e-26	FALSE	protein_coding;protein_coding;protein_coding	ENST00000423158.3;ENST00000535299.4;ENST00000543548.1
cg20467658	MIR9-3HG	15	89933347	TRUE	Island	0.66024	0.248434	-0.411806	-0.510437	1.32256e-38	5.78477e-35	FALSE	lincRNA;lincRNA;lincRNA;lincRNA;lincRNA;lincRNA;lincRNA;lincRNA;lincRNA	ENST00000536780.5;ENST00000538734.5;ENST00000546186.2;ENST00000558692.4;ENST00000558982.4;ENST00000559235.4;ENST00000560596.4;ENST00000561037.4;ENST00000561327.4
cg20471691	HOXB-AS3;HOXB-AS3;HOXB6	17	46681316	NA		0.641647	0.165983	-0.475664	-0.596071	1.66004e-45	1.52942e-41	FALSE	antisense;antisense;antisense;antisense;antisense;protein_coding;protein_coding;protein_coding;protein_coding	ENST00000466037.5;ENST00000467155.5;ENST00000487849.6;ENST00000491264.4;ENST00000494420.1;ENST00000552000.2;ENST00000225648.3;ENST00000484302.3;ENST00000490419.1
cg20480274	SEZ6;SEZ6	17	27313125	TRUE	Island	0.770145	0.41942	-0.350725	-0.388093	1.75588e-27	2.12382e-24	FALSE	protein_coding;protein_coding;protein_coding;protein_coding;protein_coding;protein_coding;protein_coding;protein_coding;protein_coding;protein_coding	ENST00000577182.4;ENST00000578748.5;ENST00000580241.4;ENST00000580383.4;ENST00000583215.4;ENST00000317338.15;ENST00000335960.9;ENST00000360295.12;ENST00000442608.6;ENST00000585644.1
cg20593826		1	59280370	TRUE	Island	0.818613	0.329765	-0.488848	-0.449028	1.29486e-15	3.27894e-13	FALSE	lincRNA;lincRNA	ENST00000419531.2;ENST00000607372.1
cg20619808	SEZ6;SEZ6	17	27313499	TRUE		0.323605	0.22968	-0.0939242	-0.151643	1.28237e-16	3.77234e-14	FALSE	protein_coding;protein_coding;protein_coding;protein_coding;protein_coding;protein_coding;protein_coding;protein_coding;protein_coding;protein_coding	ENST00000577182.4;ENST00000578748.5;ENST00000580241.4;ENST00000580383.4;ENST00000583215.4;ENST00000317338.15;ENST00000335960.9;ENST00000360295.12;ENST00000442608.6;ENST00000585644.1
cg20629183	MPP2	17	41985830	NA		0.422382	0.186094	-0.236289	-0.189511	1.80583e-14	3.81629e-12	FALSE	protein_coding;protein_coding;protein_coding;protein_coding;protein_coding;protein_coding;protein_coding;protein_coding;protein_coding;protein_coding;protein_coding;protein_coding;protein_coding;protein_coding;protein_coding;protein_coding;protein_coding	ENST00000269095.7;ENST00000461854.4;ENST00000518478.1;ENST00000518766.4;ENST00000520241.4;ENST00000520305.4;ENST00000520319.1;ENST00000520406.4;ENST00000521178.4;ENST00000522172.4;ENST00000523220.4;ENST00000523501.4;ENST00000523762.4;ENST00000523934.4;ENST00000612133.3;ENST00000622681.3;ENST00000625880.1
cg20637609		17	46825011	NA	S_Shore	0.220153	0.0779444	-0.142209	-0.144977	2.08153e-16	5.96914e-14	FALSE	.	.
cg20676788		13	49379791	TRUE		0.418903	0.862528	0.443625	0.276642	2.63581e-05	0.000568575	FALSE	.	.
cg20678835	HTR1D	1	23521332	TRUE	S_Shore	0.813128	0.723284	-0.0898442	-0.161214	4.2155e-17	1.3324e-14	FALSE	protein_coding	ENST00000374619.1
cg20697010		15	31683664	NA		0.585421	0.403216	-0.182205	-0.366758	4.11211e-21	2.3522e-18	FALSE	protein_coding;protein_coding	ENST00000500533.3;ENST00000558921.1
cg20752878	ASGR1	17	7080538	NA	S_Shore	0.742624	0.365617	-0.377007	-0.441631	1.97495e-27	2.37553e-24	FALSE	protein_coding;protein_coding;protein_coding;protein_coding;protein_coding;protein_coding;protein_coding;protein_coding;protein_coding	ENST00000269299.6;ENST00000380920.7;ENST00000570576.1;ENST00000572879.4;ENST00000573083.1;ENST00000573596.1;ENST00000574330.4;ENST00000574388.4;ENST00000619926.3
cg20831708	SEC31B	10	102279373	TRUE	Island	0.464996	0.13413	-0.330866	-0.291067	7.05027e-18	2.5106e-15	FALSE	protein_coding;protein_coding;protein_coding;protein_coding;protein_coding;protein_coding;protein_coding;protein_coding;protein_coding;protein_coding	ENST00000527595.4;ENST00000528174.4;ENST00000529568.4;ENST00000533549.1;ENST00000557395.4;ENST00000370345.6;ENST00000462434.4;ENST00000479697.4;ENST00000480905.1;ENST00000482456.5
cg20903160		6	139117274	TRUE	N_Shore	0.359539	0.14175	-0.217789	-0.190375	8.68824e-19	3.5392e-16	FALSE	protein_coding;protein_coding;protein_coding;protein_coding	ENST00000367682.5;ENST00000401414.3;ENST00000423192.4;ENST00000541398.4
cg20918682	LRRN4	20	6034694	NA	N_Shore	0.622568	0.406901	-0.215667	-0.299194	2.25596e-33	5.28039e-30	FALSE	protein_coding	ENST00000378858.4
cg20951444	FNDC5	1	33337112	TRUE	Island	0.748622	0.539459	-0.209163	-0.276052	1.82202e-21	1.08524e-18	FALSE	protein_coding;protein_coding;protein_coding	ENST00000373471.6;ENST00000465346.1;ENST00000496770.1
cg20996314	HR;HR	8	21989292	TRUE		0.632677	0.354028	-0.278649	-0.367473	1.48996e-29	2.22475e-26	FALSE	protein_coding;protein_coding;protein_coding;protein_coding	ENST00000312841.9;ENST00000381418.7;ENST00000518377.1;ENST00000522759.1
cg21017569	KCNAB3	17	7832769	NA	N_Shore	0.907316	0.205194	-0.702122	-0.742859	3.06704e-32	6.1202e-29	FALSE	protein_coding;protein_coding;protein_coding;protein_coding;protein_coding	ENST00000303790.2;ENST00000570587.4;ENST00000570852.1;ENST00000574006.4;ENST00000573621.1
cg21051972		11	18067927	NA		0.553086	0.253901	-0.299185	-0.252162	2.58222e-20	1.29866e-17	FALSE	.	.
cg21067023	COLEC12	18	501513	NA	N_Shore	0.668617	0.29589	-0.372728	-0.446881	3.01471e-49	4.66222e-45	FALSE	protein_coding;protein_coding	ENST00000400256.4;ENST00000582147.1
cg21101631	PCDHGA4;PCDHGC3;PCDHGA12;PCDHGA11;PCDHGA11;PCDHGA9;PCDHGA1;PCDHGB1;PCDHGB6;PCDHGB3;PCDHGB7;PCDHGA6;PCDHGA8;PCDHGA10;PCDHGA5;PCDHGB4;PCDHGB4;PCDHGA3;PCDHGA2;PCDHGA7;PCDHGB2;PCDHGC5;PCDHGB5;PCDHGC3	5	140874572	TRUE		0.281288	0.0676355	-0.213653	-0.263788	5.14509e-29	7.3772e-26	FALSE	protein_coding;protein_coding;protein_coding;protein_coding;protein_coding;protein_coding;protein_coding;protein_coding;protein_coding;protein_coding;protein_coding;protein_coding;protein_coding;protein_coding;protein_coding;protein_coding;protein_coding;protein_coding;protein_coding;protein_coding;protein_coding;protein_coding;protein_coding;protein_coding;protein_coding;protein_coding;protein_c…	ENST00000517417.2;ENST00000398610.2;ENST00000398587.5;ENST00000518882.2;ENST00000252085.3;ENST00000394576.2;ENST00000253812.7;ENST00000612467.1;ENST00000571252.2;ENST00000518069.1;ENST00000517434.2;ENST00000518325.1;ENST00000398604.2;ENST00000573521.1;ENST00000523390.1;ENST00000522605.1;ENST00000576222.1;ENST00000519479.1;ENST00000617380.1;ENST00000520790.1;ENST00000398594.3;ENST00000308177.4;ENS…
cg21116900	SLC17A8;SLC17A8	12	100750760	TRUE	S_Shore	0.224197	0.137946	-0.0862515	-0.119061	1.00123e-19	4.60734e-17	FALSE	protein_coding;protein_coding	ENST00000323346.8;ENST00000392989.3
cg21127735		17	47547353	NA		0.122633	0.0500299	-0.0726035	-0.112495	9.84728e-21	5.29696e-18	FALSE	antisense	ENST00000576461.1
cg21144493	CAMTA1	1	7130061	TRUE	S_Shore	0.446837	0.143271	-0.303566	-0.330735	5.23652e-23	3.69903e-20	FALSE	protein_coding	ENST00000303635.10
cg21173803		22	27299879	TRUE	S_Shore	0.325301	0.193382	-0.131919	-0.172542	8.66042e-22	5.38037e-19	FALSE	lincRNA;lincRNA	ENST00000438113.1;ENST00000447149.4
cg21211253		5	139168323	NA		0.864913	0.706244	-0.158668	-0.209969	4.48554e-25	4.05495e-22	FALSE	.	.
cg21213853	GRM2;GRM2	3	51741473	TRUE	Island	0.711991	0.234004	-0.477986	-0.453311	1.84814e-26	1.96628e-23	FALSE	protein_coding;protein_coding;protein_coding;protein_coding;protein_coding;protein_coding	ENST00000296479.8;ENST00000395052.6;ENST00000419928.1;ENST00000442933.2;ENST00000464585.1;ENST00000475478.4
cg21250100	CSDC2	22	41956987	TRUE	Island	0.216683	0.129473	-0.0872099	-0.140878	7.15458e-18	2.53732e-15	FALSE	protein_coding	ENST00000306149.10
cg21255657	CANT1;CANT1;CANT1	17	77006304	NA	S_Shore	0.196753	0.091618	-0.105135	-0.196056	2.30408e-15	5.63041e-13	FALSE	protein_coding;protein_coding;protein_coding;protein_coding;protein_coding;protein_coding;protein_coding;protein_coding;protein_coding;protein_coding;protein_coding;protein_coding;protein_coding	ENST00000302345.5;ENST00000392446.8;ENST00000586916.5;ENST00000587242.4;ENST00000588075.4;ENST00000588611.4;ENST00000590370.4;ENST00000591625.4;ENST00000591732.1;ENST00000591773.4;ENST00000591811.1;ENST00000592033.4;ENST00000592228.1
cg21325822		3	154497591	TRUE	S_Shelf	0.488245	0.895967	0.407721	0.304529	7.45098e-13	1.1932e-10	FALSE	.	.
cg21376136	CACNB4;CACNB4;CACNB4;CACNB4	2	152830572	NA		0.433176	0.129532	-0.303644	-0.404166	2.94959e-32	5.94059e-29	FALSE	protein_coding;protein_coding;protein_coding;protein_coding;protein_coding;protein_coding;protein_coding;protein_coding;protein_coding	ENST00000201943.8;ENST00000360283.9;ENST00000397327.5;ENST00000427385.4;ENST00000439467.4;ENST00000470066.1;ENST00000475848.1;ENST00000534999.4;ENST00000539935.4
cg21422700		1	201229247	TRUE	Island	0.224805	0.110186	-0.114619	-0.0908719	9.35903e-10	8.19873e-08	FALSE	.	.
cg21484547		13	28319144	TRUE	N_Shelf	0.706748	0.494899	-0.211849	-0.272072	3.56623e-25	3.28562e-22	FALSE	.	.
cg21484940	UPP1;UPP1	7	48129992	NA	Island	0.88893	0.454207	-0.434723	-0.478155	1.20954e-35	3.76801e-32	FALSE	protein_coding;protein_coding;protein_coding;protein_coding;protein_coding;protein_coding;protein_coding;protein_coding;protein_coding;protein_coding;protein_coding	ENST00000331803.7;ENST00000395560.6;ENST00000395564.7;ENST00000416681.4;ENST00000417464.5;ENST00000421046.4;ENST00000432131.4;ENST00000436673.4;ENST00000444999.4;ENST00000457596.4;ENST00000482015.4
cg21518089	SLC17A6	11	22362708	TRUE	Island	0.232297	0.142428	-0.0898689	-0.107776	8.71307e-15	1.93483e-12	FALSE	protein_coding	ENST00000263160.3
cg21550024	FGF2	4	123747533	NA	S_Shore	0.579431	0.209057	-0.370374	-0.30877	1.05847e-11	1.37268e-09	FALSE	miRNA;protein_coding;protein_coding;protein_coding	ENST00000517260.1;ENST00000264498.6;ENST00000608478.1;ENST00000614010.3
cg21629821	LOC93429	19	46713473	NA	S_Shore	0.240135	0.544552	0.304417	0.26779	7.34787e-13	1.17799e-10	FALSE	processed_transcript;processed_transcript	ENST00000593980.1;ENST00000598170.1
cg21633052	WWC2-AS2	4	184018637	NA	Island	0.309218	0.0358442	-0.273374	-0.269017	1.66167e-44	1.24058e-40	FALSE	lincRNA	ENST00000578387.1
cg21683284	DNAJC6	1	65774857	NA		0.267883	0.0738509	-0.194032	-0.126611	2.75544e-18	1.04388e-15	FALSE	protein_coding;protein_coding;protein_coding;protein_coding;protein_coding;protein_coding	ENST00000263441.10;ENST00000371069.4;ENST00000395325.6;ENST00000463018.4;ENST00000483402.1;ENST00000494710.5
cg21692450		1	46940325	NA		0.243825	0.0326645	-0.21116	-0.197541	1.2572e-21	7.66746e-19	FALSE	lincRNA	ENST00000455247.1
cg21772773	CAMTA1	1	6880294	TRUE	S_Shore	0.543414	0.860969	0.317555	0.300236	6.03238e-07	2.47689e-05	FALSE	protein_coding;protein_coding;protein_coding;protein_coding;protein_coding;protein_coding;protein_coding;protein_coding	ENST00000303635.10;ENST00000461311.1;ENST00000467404.5;ENST00000473578.4;ENST00000476163.4;ENST00000486138.1;ENST00000490738.4;ENST00000557126.4
cg21831481		4	41880604	NA	S_Shore	0.190934	0.108575	-0.0823585	-0.0619854	4.01411e-06	0.000122252	FALSE	lincRNA	ENST00000504870.1
cg21899500	GRM2;GRM2	3	51740850	TRUE	Island	0.580073	0.319465	-0.260608	-0.198185	1.49412e-21	9.02343e-19	FALSE	protein_coding;protein_coding;protein_coding;protein_coding;protein_coding	ENST00000296479.8;ENST00000395052.6;ENST00000419928.1;ENST00000464585.1;ENST00000475478.4
cg21950155	URAD	13	28555387	NA	S_Shelf	0.645284	0.310692	-0.334592	-0.576125	3.01443e-23	2.22368e-20	FALSE	protein_coding	ENST00000332715.5
cg21970789		5	134826388	NA	Island	0.297207	0.177514	-0.119693	-0.103744	7.51814e-13	1.20306e-10	FALSE	.	.
cg21998208	ADGRV1;ADGRV1	5	89853771	NA	Island	0.397222	0.244253	-0.152968	-0.188207	2.14201e-18	8.23007e-16	FALSE	protein_coding;protein_coding	ENST00000405460.5;ENST00000508842.4
cg22033281		11	111325754	TRUE		0.581581	0.316071	-0.26551	-0.251276	8.2393e-35	2.34721e-31	FALSE	protein_coding;antisense;antisense	ENST00000525890.1;ENST00000527555.1;ENST00000528953.1
cg22065514	COL7A1;UCN2	3	48602040	NA		0.597221	0.338386	-0.258834	-0.33324	6.88076e-21	3.77629e-18	FALSE	protein_coding;protein_coding;protein_coding;protein_coding;protein_coding;protein_coding	ENST00000328333.11;ENST00000465238.4;ENST00000466591.1;ENST00000470076.1;ENST00000487017.4;ENST00000273610.3
cg22076941		1	70036106	NA	Island	0.610963	0.248975	-0.361989	-0.420902	1.10843e-30	1.88793e-27	FALSE	protein_coding;protein_coding	ENST00000310961.8;ENST00000370958.4
cg22110896	TBX4	17	59533081	NA	N_Shore	0.426856	0.198639	-0.228217	-0.176753	3.52946e-08	2.1162e-06	FALSE	protein_coding;protein_coding;protein_coding	ENST00000240335.1;ENST00000393853.7;ENST00000589003.4
cg22122321		4	85407081	NA		0.459507	0.3149	-0.144607	-0.25006	5.75668e-21	3.2123e-18	FALSE	.	.
cg22130008		4	155548532	NA	N_Shelf	0.405636	0.221138	-0.184498	-0.252049	2.63222e-32	5.32616e-29	TRUE	protein_coding;protein_coding;protein_coding	ENST00000499392.1;ENST00000500890.5;ENST00000502525.4
cg22138302	ABCG4;ABCG4	11	119019412	NA	Island	0.606577	0.427769	-0.178808	-0.220311	1.82044e-15	4.5148e-13	FALSE	protein_coding;protein_coding;protein_coding;protein_coding	ENST00000524604.4;ENST00000615496.3;ENST00000619701.3;ENST00000622721.1
cg22138735	SOX18	20	62679713	NA	Island	0.416004	0.0318973	-0.384107	-0.202306	3.23502e-18	1.20865e-15	FALSE	protein_coding;protein_coding;protein_coding	ENST00000340356.8;ENST00000475792.1;ENST00000450537.4
cg22190721	ESRP2	16	68269295	NA	N_Shore	0.891516	0.524592	-0.366924	-0.343919	3.63016e-23	2.64189e-20	FALSE	protein_coding;protein_coding;protein_coding;protein_coding;protein_coding;protein_coding;protein_coding;protein_coding;protein_coding;protein_coding	ENST00000251366.6;ENST00000473183.5;ENST00000562567.5;ENST00000562724.1;ENST00000562738.4;ENST00000563159.4;ENST00000564382.4;ENST00000564465.1;ENST00000565858.4;ENST00000569964.4
cg22193385	KRT7	12	52638005	TRUE	Island	0.229949	0.710538	0.48059	0.42172	1.48002e-29	2.21756e-26	FALSE	protein_coding;protein_coding;protein_coding;protein_coding;protein_coding	ENST00000331817.5;ENST00000548657.4;ENST00000549127.4;ENST00000552183.1;ENST00000552322.4
cg22268510	PRRT1	6	32118420	NA	N_Shore	0.328822	0.0308138	-0.298008	-0.273797	2.70967e-23	2.00914e-20	FALSE	protein_coding;protein_coding;protein_coding;protein_coding;protein_coding;protein_coding	ENST00000211413.8;ENST00000375150.5;ENST00000428778.4;ENST00000467780.4;ENST00000472641.1;ENST00000495191.4
cg22277296		5	54180170	NA		0.683551	0.470954	-0.212597	-0.22593	9.32231e-24	7.40684e-21	FALSE	.	.
cg22363327	SRSF12	6	89828097	NA	S_Shore	0.440239	0.146971	-0.293268	-0.208117	6.5788e-14	1.26386e-11	FALSE	protein_coding;protein_coding;protein_coding	ENST00000452027.2;ENST00000475068.1;ENST00000517387.1
cg22364219	SZRD1;SZRD1	1	16714091	NA		0.157575	0.645165	0.487589	0.593723	6.13072e-28	7.76231e-25	FALSE	protein_coding;protein_coding;protein_coding;protein_coding;protein_coding;protein_coding;protein_coding;protein_coding;protein_coding;protein_coding;protein_coding	ENST00000491418.4;ENST00000401088.7;ENST00000401089.3;ENST00000471507.4;ENST00000472351.4;ENST00000472461.1;ENST00000475078.1;ENST00000475554.4;ENST00000476423.4;ENST00000486763.4;ENST00000492354.1
cg22398226		4	155662217	NA	N_Shore	0.70525	0.106372	-0.598878	-0.722741	3.43274e-30	5.63044e-27	FALSE	protein_coding;protein_coding;protein_coding	ENST00000499392.1;ENST00000502525.4;ENST00000507827.4
cg22443762	LHX9;LHX9	1	197890608	NA	N_Shelf	0.342696	0.166681	-0.176015	-0.126813	2.10192e-13	3.71497e-11	FALSE	protein_coding;protein_coding;protein_coding;protein_coding	ENST00000367387.5;ENST00000367390.6;ENST00000367391.4;ENST00000561173.4
cg22454744	CEP170B;CEP170B	14	105332600	NA		0.397732	0.260734	-0.136998	-0.131564	3.81929e-12	5.36607e-10	FALSE	protein_coding;protein_coding;protein_coding	ENST00000414716.6;ENST00000453495.2;ENST00000556508.4
cg22455527		7	73241878	NA	Island	0.323224	0.674339	0.351114	0.355032	8.83119e-22	5.4786e-19	FALSE	protein_coding;protein_coding;protein_coding;protein_coding	ENST00000431918.1;ENST00000435050.1;ENST00000466411.1;ENST00000476494.1
cg22460123	KRT7	12	52638294	NA	Island	0.260326	0.739179	0.478853	0.434893	2.99715e-25	2.79702e-22	FALSE	protein_coding;protein_coding;protein_coding;protein_coding;protein_coding	ENST00000331817.5;ENST00000548657.4;ENST00000549127.4;ENST00000552183.1;ENST00000552322.4
cg22497969	PRDM16;PRDM16	1	3143018	NA	N_Shore	0.652081	0.876921	0.22484	0.219326	1.13205e-21	6.94333e-19	TRUE	protein_coding;protein_coding;protein_coding;protein_coding	ENST00000270722.8;ENST00000378391.5;ENST00000511072.4;ENST00000514189.4
cg22505962	CLEC3B	3	45067627	TRUE	S_Shore	0.2729	0.526847	0.253947	0.224353	2.77165e-16	7.75809e-14	FALSE	protein_coding;protein_coding;protein_coding	ENST00000296130.4;ENST00000490386.1;ENST00000481405.1
cg22522920	FAIM2	12	50276512	TRUE		0.533823	0.432821	-0.101003	-0.189514	2.98517e-25	2.79187e-22	FALSE	protein_coding;protein_coding;protein_coding;protein_coding;protein_coding	ENST00000320634.6;ENST00000550195.4;ENST00000550890.4;ENST00000552669.4;ENST00000552863.4
cg22535403	ABO	9	136150032	NA	S_Shore	0.454855	0.716822	0.261966	0.35141	6.7309e-15	1.51655e-12	FALSE	protein_coding;protein_coding;protein_coding	ENST00000453660.3;ENST00000538324.2;ENST00000611156.3
cg22622477	HOXB7	17	46685442	NA	N_Shore	0.349137	0.074614	-0.274523	-0.204	1.89041e-20	9.73346e-18	FALSE	protein_coding;protein_coding;protein_coding	ENST00000239165.8;ENST00000467314.1;ENST00000567101.2
cg22658758		5	92935309	NA	N_Shelf	0.224884	0.113924	-0.110959	-0.0733367	3.85251e-09	2.92976e-07	FALSE	TEC	ENST00000623223.1
cg22670033		5	180646608	NA	Island	0.842102	0.453111	-0.38899	-0.425609	1.52227e-32	3.12403e-29	FALSE	.	.
cg22675801	TRIL	7	28998346	NA		0.281774	0.0780214	-0.203753	-0.157552	3.28883e-16	9.07661e-14	FALSE	lincRNA;protein_coding	ENST00000436594.1;ENST00000539664.2
cg22697136	FBXO44;FBXO2;FBXO44;FBXO44;FBXO44	1	11714248	NA	N_Shore	0.524751	0.320417	-0.204335	-0.211115	5.33925e-18	1.94122e-15	FALSE	protein_coding;protein_coding;protein_coding;protein_coding;protein_coding;protein_coding;protein_coding;protein_coding;protein_coding;protein_coding;protein_coding	ENST00000354287.4;ENST00000465901.1;ENST00000466919.1;ENST00000475961.1;ENST00000251546.7;ENST00000251547.8;ENST00000376760.4;ENST00000376762.7;ENST00000376768.4;ENST00000376770.4;ENST00000425796.4
cg22747380	EXT1	8	118993090	TRUE	N_Shelf	0.414512	0.145082	-0.26943	-0.291687	9.01568e-13	1.42013e-10	FALSE	protein_coding;protein_coding;protein_coding	ENST00000378204.5;ENST00000436216.1;ENST00000437196.1
cg22784595		10	7455714	NA		0.863298	0.625739	-0.237559	-0.272823	1.46286e-14	3.12966e-12	FALSE	.	.
cg22849665	PRRT1	6	32118375	NA	S_Shore	0.429255	0.043691	-0.385564	-0.443169	5.43812e-49	7.84935e-45	FALSE	protein_coding;protein_coding;protein_coding;protein_coding;protein_coding;protein_coding	ENST00000211413.8;ENST00000375150.5;ENST00000428778.4;ENST00000467780.4;ENST00000472641.1;ENST00000495191.4
cg22894517		11	124733038	NA		0.242248	0.156292	-0.0859565	-0.118472	3.50957e-22	2.24146e-19	FALSE	.	.
cg22904401		5	92947872	NA	S_Shore	0.298874	0.185976	-0.112898	-0.127055	2.55834e-21	1.49502e-18	FALSE	.	.
cg22999603	NECTIN1;NECTIN1	11	119537405	NA	S_Shore	0.325083	0.224159	-0.100924	-0.180084	1.00129e-16	2.99223e-14	FALSE	protein_coding;protein_coding	ENST00000264025.6;ENST00000341398.5
cg23008153	RNF180;RNF180	5	63461305	TRUE	S_Shore	0.398102	0.305669	-0.0924335	-0.125398	8.13942e-15	1.81396e-12	FALSE	protein_coding;protein_coding;protein_coding	ENST00000296615.9;ENST00000389100.7;ENST00000504296.1
cg23009780		2	96774492	TRUE		0.670234	0.347172	-0.323062	-0.338549	6.34442e-22	3.97576e-19	TRUE	.	.
cg23038338		1	46996546	NA	N_Shore	0.704324	0.384703	-0.319621	-0.366036	1.31933e-26	1.44266e-23	FALSE	.	.
cg23060047		12	130819504	NA	S_Shore	0.433386	0.833137	0.399751	0.395718	4.03062e-37	1.4791e-33	FALSE	.	.
cg23109891	SOX10	22	38379218	NA	Island	0.91178	0.498392	-0.413388	-0.410878	4.78952e-27	5.50118e-24	FALSE	protein_coding;protein_coding;protein_coding;sense_overlapping;protein_coding;protein_coding;protein_coding;protein_coding;protein_coding	ENST00000405557.4;ENST00000407936.4;ENST00000443002.4;ENST00000623111.1;ENST00000360880.5;ENST00000396884.5;ENST00000427770.1;ENST00000446929.4;ENST00000470555.1
cg23115387	FOXE3	1	47882936	TRUE		0.474518	0.22889	-0.245628	-0.191094	4.08504e-14	8.10305e-12	FALSE	protein_coding	ENST00000335071.3
cg23135908		11	1989715	TRUE		0.767576	0.509002	-0.258574	-0.356171	1.28842e-17	4.39644e-15	FALSE	protein_coding;protein_coding	ENST00000397294.6;ENST00000397297.6
cg23145336	TNXB	6	32060816	NA	Island	0.879209	0.647984	-0.231224	-0.273119	3.10859e-26	3.24356e-23	FALSE	protein_coding;protein_coding	ENST00000375244.6;ENST00000613214.3
cg23201812		11	34771918	TRUE	S_Shore	0.248645	0.900311	0.651666	0.502453	2.38769e-20	1.21209e-17	FALSE	.	.
cg23214464	ADCK2	7	140373596	NA	N_Shore	0.182866	0.426194	0.243329	0.32173	5.39297e-21	3.02886e-18	FALSE	protein_coding;protein_coding;protein_coding;protein_coding;protein_coding;protein_coding	ENST00000072869.7;ENST00000476491.4;ENST00000483369.4;ENST00000498423.1;ENST00000622666.3;ENST00000489552.1
cg23236370	ADAMTS12	5	33892705	NA	S_Shore	0.847632	0.546031	-0.3016	-0.308349	1.26076e-17	4.31566e-15	FALSE	protein_coding;protein_coding;protein_coding;protein_coding	ENST00000352040.6;ENST00000504830.4;ENST00000509762.1;ENST00000515401.1
cg23254047	ZNF25	10	38264940	NA		0.165118	0.493769	0.328651	0.257164	8.44642e-14	1.5902e-11	FALSE	lincRNA;protein_coding;protein_coding;protein_coding	ENST00000412789.1;ENST00000302609.7;ENST00000374633.4;ENST00000467975.2
cg23300529	HR;HR	8	21989012	TRUE	N_Shelf	0.768997	0.516715	-0.252282	-0.320894	2.84371e-26	2.98878e-23	FALSE	protein_coding;protein_coding;protein_coding;protein_coding	ENST00000312841.9;ENST00000381418.7;ENST00000518377.1;ENST00000522759.1
cg23365801	KCNAB3	17	7832909	NA	Island	0.683623	0.0463815	-0.637242	-0.542689	6.60522e-43	4.20614e-39	FALSE	protein_coding;protein_coding;protein_coding;protein_coding	ENST00000303790.2;ENST00000570587.4;ENST00000570852.1;ENST00000573621.1
cg23367683	TRIM7;TRIM7;TRIM7;TRIM7;TRIM7	5	180627941	NA	N_Shelf	0.878138	0.612925	-0.265213	-0.361814	1.19473e-23	9.38911e-21	FALSE	antisense;antisense;antisense;antisense;antisense;protein_coding;protein_coding;protein_coding;protein_coding	ENST00000419707.2;ENST00000502812.2;ENST00000509080.4;ENST00000511517.1;ENST00000514784.1;ENST00000274773.10;ENST00000393315.4;ENST00000393319.6;ENST00000422067.2
cg23381646	GCK;GCK;GCK	7	44187310	NA	Island	0.74266	0.412797	-0.329863	-0.403519	6.34248e-38	2.51964e-34	FALSE	protein_coding;protein_coding;protein_coding;protein_coding;protein_coding;protein_coding	ENST00000345378.5;ENST00000395796.6;ENST00000403799.6;ENST00000437084.1;ENST00000473353.1;ENST00000616242.3
cg23403099	TMEM132E	17	32942254	TRUE	N_Shore	0.292604	0.105693	-0.186911	-0.234498	1.43944e-26	1.55826e-23	FALSE	protein_coding	ENST00000321639.5
cg23444264		10	72219751	NA	Island	0.663346	0.419945	-0.243401	-0.368504	6.6467e-27	7.49516e-24	FALSE	.	.
cg23448390	NPSR1;NPSR1	7	34889338	NA		0.522559	0.696912	0.174353	0.209187	1.91233e-09	1.55946e-07	FALSE	protein_coding;protein_coding;protein_coding;protein_coding;protein_coding;protein_coding;processed_transcript	ENST00000359791.4;ENST00000360581.4;ENST00000381542.4;ENST00000381544.5;ENST00000396095.5;ENST00000531252.4;ENST00000431669.4
cg23458168	ZNF536	19	30864867	TRUE	N_Shore	0.52622	0.200327	-0.325893	-0.593113	1.94981e-31	3.57756e-28	FALSE	protein_coding;protein_coding;protein_coding	ENST00000355537.3;ENST00000585628.4;ENST00000591488.1
cg23460961		11	94382347	TRUE	S_Shore	0.260992	0.695008	0.434016	0.314362	1.86995e-15	4.62171e-13	FALSE	lincRNA;lincRNA;lincRNA;antisense;antisense	ENST00000540151.4;ENST00000542479.1;ENST00000544019.4;ENST00000536540.4;ENST00000537874.1
cg23484599	PAX6;PAX6;PAX6	11	31831137	NA		0.720042	0.375352	-0.344691	-0.312776	2.6225e-23	1.95119e-20	FALSE	protein_coding;protein_coding;protein_coding;protein_coding;protein_coding;protein_coding;protein_coding;protein_coding;protein_coding;protein_coding;protein_coding;protein_coding;protein_coding;protein_coding;protein_coding;protein_coding;protein_coding;protein_coding	ENST00000241001.11;ENST00000379107.5;ENST00000379109.5;ENST00000379111.5;ENST00000379115.7;ENST00000379123.8;ENST00000379129.5;ENST00000379132.6;ENST00000419022.4;ENST00000423822.5;ENST00000438681.4;ENST00000464174.4;ENST00000524853.4;ENST00000525535.1;ENST00000527769.4;ENST00000532175.4;ENST00000533333.4;ENST00000606377.4
cg23534245	BMP2	20	6751435	NA	Island	0.533518	0.255805	-0.277713	-0.446297	3.29819e-49	4.92474e-45	FALSE	protein_coding	ENST00000378827.4
cg23558002	URAD	13	28553501	TRUE	Island	0.26598	0.081513	-0.184467	-0.30804	5.67192e-18	2.05699e-15	FALSE	protein_coding	ENST00000332715.5
cg23573129	TBX1;TBX1;TBX1	22	19751148	TRUE	N_Shore	0.43014	0.219344	-0.210795	-0.31937	3.37157e-25	3.11955e-22	FALSE	protein_coding;protein_coding;protein_coding;protein_coding;protein_coding;protein_coding	ENST00000329705.10;ENST00000332710.7;ENST00000359500.6;ENST00000475303.1;ENST00000484336.1;ENST00000621939.1
cg23626546	RNF182;RNF182;RNF182;RNF182	6	13924355	NA	Island	0.80246	0.609629	-0.192831	-0.341675	4.10627e-28	5.30773e-25	FALSE	protein_coding;protein_coding;protein_coding;protein_coding;protein_coding;protein_coding;protein_coding;protein_coding	ENST00000420478.2;ENST00000423553.5;ENST00000471906.1;ENST00000488300.4;ENST00000488763.4;ENST00000537388.1;ENST00000537663.4;ENST00000544682.4
cg23637791	ODF3L1	15	76016262	TRUE		0.203407	0.104659	-0.0987478	-0.151564	2.56399e-25	2.44549e-22	FALSE	protein_coding	ENST00000332145.2
cg23651872	TBC1D16	17	77924733	NA	N_Shore	0.650786	0.131847	-0.51894	-0.512468	1.08956e-32	2.27922e-29	FALSE	protein_coding;protein_coding;protein_coding;protein_coding;protein_coding;protein_coding;protein_coding;protein_coding;protein_coding	ENST00000310924.5;ENST00000340848.10;ENST00000570373.4;ENST00000571872.1;ENST00000572862.4;ENST00000573782.4;ENST00000574241.5;ENST00000574427.1;ENST00000576768.4
cg23669081	HOXB7	17	46685353	NA	N_Shore	0.693067	0.0565406	-0.636526	-0.351999	4.57369e-20	2.22028e-17	FALSE	protein_coding;protein_coding;protein_coding	ENST00000239165.8;ENST00000467314.1;ENST00000567101.2
cg23725321	SEC31B	10	102279690	TRUE	Island	0.422759	0.0865842	-0.336175	-0.275686	1.15289e-14	2.51624e-12	FALSE	protein_coding;protein_coding;protein_coding;protein_coding;protein_coding;protein_coding;protein_coding;protein_coding;protein_coding;protein_coding	ENST00000527595.4;ENST00000528174.4;ENST00000529568.4;ENST00000533549.1;ENST00000557395.4;ENST00000370345.6;ENST00000462434.4;ENST00000479697.4;ENST00000480905.1;ENST00000482456.5
cg23752348	RNF39;RNF39	6	30042137	TRUE	Island	0.62933	0.413495	-0.215835	-0.269257	8.47514e-28	1.04854e-24	FALSE	protein_coding;protein_coding	ENST00000244360.6;ENST00000376751.6
cg23786580	HECW1	7	43204506	TRUE		0.167401	0.650628	0.483227	0.338424	1.29234e-16	3.79653e-14	FALSE	protein_coding;protein_coding;protein_coding;protein_coding	ENST00000395891.5;ENST00000453890.4;ENST00000490954.2;ENST00000492310.4
cg23819016		13	28397193	NA	S_Shore	0.194407	0.0904342	-0.103973	-0.149603	5.46979e-23	3.83255e-20	FALSE	.	.
cg23835219	CTBP1;CTBP1;CTBP1-DT	4	1244017	NA		0.559175	0.794783	0.235608	0.422921	5.95357e-37	2.14834e-33	FALSE	protein_coding;protein_coding;protein_coding;protein_coding;protein_coding;protein_coding;protein_coding;antisense;antisense;antisense;antisense;antisense	ENST00000290921.9;ENST00000382952.6;ENST00000506180.4;ENST00000513420.1;ENST00000514210.4;ENST00000514495.1;ENST00000515399.4;ENST00000357591.2;ENST00000507044.1;ENST00000514984.1;ENST00000578730.1;ENST00000581398.1
cg23848052	MEGF11	15	66318701	TRUE	Island	0.565524	0.327651	-0.237873	-0.350004	3.41391e-24	2.87604e-21	FALSE	protein_coding;protein_coding;protein_coding;protein_coding	ENST00000288745.6;ENST00000395614.4;ENST00000409699.5;ENST00000422354.4
cg23860422	MGARP	4	140201537	NA	S_Shore	0.289971	0.145193	-0.144778	-0.13026	7.08798e-17	2.17367e-14	FALSE	protein_coding;protein_coding	ENST00000398955.1;ENST00000503997.4
cg23889047	CAMTA1	1	7705756	NA		0.408869	0.695748	0.286879	0.285728	4.57737e-23	3.27076e-20	FALSE	protein_coding	ENST00000303635.10
cg23907053	RAB3IP;RAB3IP;RAB3IP;RAB3IP;RAB3IP	12	70215816	TRUE	Island	0.183579	0.757583	0.574004	0.52208	6.75456e-36	2.16655e-32	FALSE	protein_coding;protein_coding	ENST00000550437.1;ENST00000550536.4
cg23923820	PKLR;PKLR	1	155267480	NA		0.442984	0.105334	-0.33765	-0.290769	3.15399e-25	2.93707e-22	FALSE	protein_coding;protein_coding;protein_coding	ENST00000342741.4;ENST00000392414.6;ENST00000434082.2
cg23928512	ASPSCR1	17	79970192	NA	N_Shore	0.815148	0.470312	-0.344836	-0.39727	2.07346e-24	1.76741e-21	FALSE	protein_coding;protein_coding;protein_coding;protein_coding;protein_coding;protein_coding;protein_coding;protein_coding;protein_coding;protein_coding;protein_coding;protein_coding;protein_coding	ENST00000306729.10;ENST00000306739.7;ENST00000577733.4;ENST00000578236.4;ENST00000578361.4;ENST00000580534.4;ENST00000581608.4;ENST00000582355.5;ENST00000583142.4;ENST00000583693.4;ENST00000583744.1;ENST00000584454.4;ENST00000585274.1
cg23937295	CAMTA1	1	7762151	NA	N_Shelf	0.814884	0.464176	-0.350708	-0.473076	2.04684e-39	1.00718e-35	FALSE	protein_coding;lincRNA	ENST00000303635.10;ENST00000602916.1
cg24030449	FGF20;FGF20	8	16859671	NA	N_Shore	0.197141	0.0401607	-0.15698	-0.135372	3.27025e-20	1.62768e-17	FALSE	protein_coding;protein_coding	ENST00000180166.5;ENST00000519941.1
cg24058566	LINC00461;LINC00461	5	87974100	TRUE		0.159844	0.0758547	-0.0839898	-0.0952571	3.49954e-16	9.60916e-14	FALSE	antisense;lincRNA;lincRNA;lincRNA;lincRNA;lincRNA;lincRNA;lincRNA;lincRNA;lincRNA;lincRNA	ENST00000510274.1;ENST00000502301.4;ENST00000506014.4;ENST00000506978.4;ENST00000509265.1;ENST00000509405.4;ENST00000509783.4;ENST00000511014.5;ENST00000513026.4;ENST00000513805.4;ENST00000513893.4
cg24059075	PRPH	12	49688316	TRUE	N_Shore	0.318396	0.160792	-0.157605	-0.235379	2.37457e-27	2.80937e-24	FALSE	protein_coding;protein_coding;protein_coding;protein_coding;antisense	ENST00000257860.7;ENST00000451891.4;ENST00000533401.1;ENST00000537252.1;ENST00000553259.1
cg24067118		10	102806933	NA	N_Shore	0.723943	0.374418	-0.349525	-0.46591	5.45047e-42	3.27799e-38	FALSE	.	.
cg24068229	FBXO27	19	39523395	NA	N_Shelf	0.326897	0.120897	-0.205999	-0.238016	7.3923e-20	3.4718e-17	FALSE	protein_coding;protein_coding;protein_coding;protein_coding;protein_coding;protein_coding	ENST00000292853.7;ENST00000509137.5;ENST00000593847.1;ENST00000594770.4;ENST00000595166.1;ENST00000600828.4
cg24070990		1	228634724	NA	S_Shelf	0.660392	0.128173	-0.532219	-0.517885	9.79134e-39	4.32635e-35	FALSE	.	.
cg24119717		5	139488731	NA	Island	0.783337	0.540138	-0.243199	-0.241955	9.77355e-15	2.14938e-12	FALSE	antisense;antisense;antisense;antisense;protein_coding	ENST00000518790.1;ENST00000521133.1;ENST00000521563.4;ENST00000523452.4;ENST00000505703.1
cg24123198		4	184018031	NA		0.654854	0.176014	-0.47884	-0.588362	1.80079e-50	3.11911e-46	FALSE	.	.
cg24135793	NFIX	19	13122567	NA	N_Shore	0.597846	0.32782	-0.270027	-0.234861	5.7696e-28	7.39154e-25	FALSE	protein_coding;protein_coding;protein_coding;protein_coding	ENST00000397661.5;ENST00000585382.4;ENST00000590027.1;ENST00000592199.4
cg24143137	PITX3	10	103995782	NA	N_Shore	0.520204	0.398388	-0.121816	-0.191178	2.0814e-31	3.80288e-28	FALSE	protein_coding	ENST00000370002.6
cg24146100	DOCK9;DOCK9	13	99737448	NA	N_Shore	0.685578	0.247116	-0.438462	-0.40379	6.63795e-19	2.75321e-16	FALSE	protein_coding;protein_coding;protein_coding;protein_coding	ENST00000339416.5;ENST00000427887.2;ENST00000448493.5;ENST00000479769.1
cg24152732	SIRT6	19	4180820	NA	Island	0.582365	0.808386	0.22602	0.229934	5.56565e-19	2.33756e-16	FALSE	protein_coding;protein_coding;protein_coding;protein_coding;protein_coding;protein_coding;protein_coding;protein_coding;protein_coding;protein_coding;protein_coding;protein_coding;protein_coding;protein_coding;protein_coding	ENST00000305232.9;ENST00000337491.5;ENST00000594279.4;ENST00000594341.1;ENST00000595670.4;ENST00000596119.4;ENST00000596298.4;ENST00000597896.4;ENST00000599365.4;ENST00000599394.1;ENST00000600540.4;ENST00000600938.4;ENST00000601069.4;ENST00000601488.4;ENST00000601571.1
cg24155190	CSRP1;CSRP1	1	201476619	NA	S_Shore	0.101933	0.296549	0.194616	0.15076	2.86619e-15	6.90275e-13	FALSE	protein_coding;protein_coding;protein_coding;protein_coding;protein_coding;protein_coding;protein_coding;protein_coding;protein_coding;protein_coding;protein_coding;protein_coding;protein_coding;protein_coding;protein_coding;antisense	ENST00000340006.5;ENST00000367306.4;ENST00000458271.5;ENST00000471596.1;ENST00000481851.1;ENST00000524951.4;ENST00000526256.4;ENST00000526317.4;ENST00000526723.4;ENST00000527573.4;ENST00000529975.4;ENST00000530120.4;ENST00000531916.4;ENST00000533188.1;ENST00000533432.4;ENST00000454651.1
cg24176731	PLEKHB1;PLEKHB1;PLEKHB1;PLEKHB1	11	73357164	NA		0.913912	0.59328	-0.320632	-0.301443	2.40086e-23	1.80489e-20	FALSE	protein_coding;protein_coding;protein_coding;protein_coding;protein_coding	ENST00000227214.9;ENST00000354190.8;ENST00000398492.7;ENST00000398494.7;ENST00000536527.4
cg24178740	FEV	2	219850465	NA		0.33015	0.214955	-0.115195	-0.117872	1.51859e-26	1.63577e-23	FALSE	protein_coding;protein_coding;antisense	ENST00000295727.1;ENST00000470119.1;ENST00000627043.1
cg24261333	PLEKHB1;PLEKHB1	11	73357019	NA		0.478511	0.277602	-0.200909	-0.282292	8.5499e-23	5.82116e-20	FALSE	protein_coding;protein_coding;protein_coding	ENST00000354190.8;ENST00000398492.7;ENST00000536527.4
cg24263062	EBF4	20	2730191	NA	N_Shore	0.605149	0.106768	-0.498381	-0.478908	3.47525e-38	1.45543e-34	FALSE	protein_coding;protein_coding;protein_coding;protein_coding;protein_coding;protein_coding	ENST00000342725.8;ENST00000380648.7;ENST00000449079.6;ENST00000463145.2;ENST00000609451.4;ENST00000609967.4
cg24277817	NFIX	19	13135662	NA	N_Shore	0.41272	0.061523	-0.351197	-0.460429	9.70449e-30	1.49545e-26	FALSE	protein_coding;protein_coding;protein_coding;protein_coding;protein_coding;protein_coding;protein_coding;protein_coding;protein_coding;protein_coding;protein_coding;protein_coding;protein_coding	ENST00000358552.6;ENST00000360105.7;ENST00000397661.5;ENST00000585382.4;ENST00000585575.4;ENST00000586797.4;ENST00000586873.1;ENST00000587260.1;ENST00000587760.4;ENST00000588228.4;ENST00000590027.1;ENST00000591028.1;ENST00000592199.4
cg24296397	BSN	3	49692537	NA		0.393572	0.658378	0.264807	0.351203	1.27948e-21	7.7924e-19	FALSE	protein_coding	ENST00000296452.4
cg24332577	SALL4	20	50419248	NA		0.822954	0.504389	-0.318565	-0.301475	5.04589e-20	2.43586e-17	FALSE	protein_coding;protein_coding;protein_coding;protein_coding	ENST00000217086.7;ENST00000371539.6;ENST00000395997.3;ENST00000483130.1
cg24360241		2	233370823	NA	N_Shore	0.528605	0.372122	-0.156483	-0.195289	1.84601e-24	1.57976e-21	FALSE	.	.
cg24375409	EPHA10	1	38200920	NA	S_Shore	0.322772	0.0819989	-0.240773	-0.268836	9.63359e-14	1.79189e-11	FALSE	protein_coding;protein_coding;protein_coding;protein_coding;protein_coding;protein_coding	ENST00000373048.7;ENST00000427468.5;ENST00000437645.4;ENST00000446149.5;ENST00000525749.1;ENST00000540011.2
cg24378227		6	1396771	NA	Island	0.507868	0.289455	-0.218413	-0.319088	3.05306e-33	7.03208e-30	FALSE	.	.
cg24382070	LGI3	8	22013694	NA	S_Shore	0.418973	0.181034	-0.237939	-0.272808	2.4943e-52	6.00042e-48	FALSE	protein_coding;protein_coding;protein_coding;protein_coding;protein_coding;protein_coding	ENST00000306317.5;ENST00000424267.5;ENST00000517694.1;ENST00000518365.1;ENST00000520124.4;ENST00000522880.1
cg24437523	ATP1A2;ATP1A2	1	160085568	NA	Island	0.676924	0.511208	-0.165716	-0.237181	9.98592e-20	4.60009e-17	FALSE	protein_coding;protein_coding;protein_coding;protein_coding	ENST00000361216.6;ENST00000392233.6;ENST00000472488.4;ENST00000478587.1
cg24438909	NTRK1;INSRR	1	156828693	TRUE		0.368444	0.265892	-0.102552	-0.160041	2.27217e-15	5.56184e-13	FALSE	protein_coding;protein_coding;protein_coding;protein_coding;protein_coding	ENST00000368195.3;ENST00000392302.5;ENST00000489021.5;ENST00000497019.5;ENST00000530298.4
cg24446178	SLC17A8;SLC17A8	12	100750702	TRUE	S_Shore	0.649351	0.437802	-0.211549	-0.318482	3.76364e-29	5.46888e-26	FALSE	protein_coding;protein_coding	ENST00000323346.8;ENST00000392989.3
cg24466377	SIX5	19	46268509	TRUE	Island	0.553733	0.196344	-0.357388	-0.487513	3.13026e-33	7.17173e-30	FALSE	processed_transcript;protein_coding;protein_coding;protein_coding	ENST00000559756.1;ENST00000317578.6;ENST00000560160.1;ENST00000622857.1
cg24495017	PITX1	5	134370530	NA		0.281991	0.145729	-0.136262	-0.114884	2.77896e-08	1.71026e-06	FALSE	antisense;antisense;antisense;antisense;protein_coding;protein_coding;protein_coding;protein_coding	ENST00000505828.4;ENST00000507641.4;ENST00000624272.2;ENST00000620001.1;ENST00000265340.10;ENST00000502676.1;ENST00000506438.4;ENST00000507253.4
cg24499605	PRDM16;PRDM16	1	3142925	NA		0.438139	0.767338	0.329199	0.331622	5.68916e-30	9.12411e-27	FALSE	protein_coding;protein_coding;protein_coding;protein_coding	ENST00000270722.8;ENST00000378391.5;ENST00000511072.4;ENST00000514189.4
cg24526899	BMP4;BMP4	14	54424149	NA		0.683736	0.395676	-0.28806	-0.412218	5.3384e-42	3.25581e-38	FALSE	protein_coding;protein_coding;protein_coding;protein_coding	ENST00000245451.7;ENST00000558489.1;ENST00000559087.4;ENST00000559642.1
cg24550149	TTC22	1	55246954	TRUE	N_Shore	0.847764	0.0781526	-0.769611	-0.868666	8.26421e-69	1.19285e-63	FALSE	protein_coding	ENST00000371276.7
cg24569831	RGMA;RGMA;RGMA;RGMA;RGMA;RGMA;RGMA	15	93617168	NA	Island	0.45921	0.897941	0.438731	0.41571	1.03857e-17	3.59776e-15	FALSE	protein_coding;protein_coding;protein_coding;protein_coding;protein_coding;protein_coding;protein_coding;protein_coding;protein_coding;protein_coding;protein_coding	ENST00000329082.10;ENST00000425933.5;ENST00000542321.5;ENST00000543599.4;ENST00000554387.4;ENST00000555598.1;ENST00000556658.1;ENST00000556950.1;ENST00000557301.2;ENST00000557420.1;ENST00000557608.1
cg24591300	HPSE2;HPSE2;HPSE2;HPSE2	10	100993025	NA	Island	0.423878	0.289832	-0.134046	-0.125561	6.78303e-18	2.42541e-15	FALSE	protein_coding;protein_coding;protein_coding;protein_coding;protein_coding	ENST00000370546.4;ENST00000370549.4;ENST00000370552.6;ENST00000614306.1;ENST00000628193.1
cg24636368	SKAP1;SKAP1	17	46388447	NA		0.820737	0.515596	-0.305141	-0.307642	6.09126e-18	2.20169e-15	FALSE	protein_coding;protein_coding;protein_coding;protein_coding;protein_coding	ENST00000336915.9;ENST00000581400.2;ENST00000581419.1;ENST00000584709.4;ENST00000584924.4
cg24718722	FOXI2	10	129536818	NA	Island	0.529455	0.0637604	-0.465695	-0.415836	2.05917e-25	1.98587e-22	FALSE	protein_coding	ENST00000388920.4
cg24720008		10	44788044	NA		0.532493	0.335687	-0.196807	-0.285863	5.43252e-27	6.19047e-24	FALSE	lincRNA;lincRNA;protein_coding;protein_coding;protein_coding	ENST00000452578.2;ENST00000624407.1;ENST00000619243.1;ENST00000623589.1;ENST00000624008.1
cg24750156	B4GALNT1	12	58025315	NA	N_Shore	0.743554	0.314732	-0.428822	-0.423905	2.98758e-32	5.98925e-29	FALSE	protein_coding;protein_coding;protein_coding;protein_coding;protein_coding;protein_coding;protein_coding;protein_coding;protein_coding;protein_coding;protein_coding;protein_coding;protein_coding;protein_coding	ENST00000341156.7;ENST00000418555.5;ENST00000449184.6;ENST00000548487.4;ENST00000548888.4;ENST00000549391.4;ENST00000550764.4;ENST00000550943.1;ENST00000551220.1;ENST00000551925.1;ENST00000552219.4;ENST00000552350.4;ENST00000552798.4;ENST00000553142.4
cg24767131	ECEL1P2	2	233251881	NA	Island	0.668317	0.0651735	-0.603144	-0.567589	5.56647e-36	1.81232e-32	FALSE	transcribed_unprocessed_pseudogene;transcribed_unprocessed_pseudogene	ENST00000461596.1;ENST00000465689.1
cg24768561	AGAP1;AGAP1	2	236401800	NA	Island	0.446081	0.208965	-0.237115	-0.104497	4.38156e-07	1.88429e-05	FALSE	protein_coding;protein_coding;protein_coding	ENST00000304032.11;ENST00000336665.8;ENST00000409457.4
cg24798010	CRB3;CRB3	19	6464885	NA	N_Shelf	0.870442	0.548443	-0.321999	-0.335755	3.03324e-20	1.51844e-17	FALSE	protein_coding;protein_coding;protein_coding;protein_coding;protein_coding	ENST00000308243.7;ENST00000356762.6;ENST00000598494.4;ENST00000600229.4;ENST00000597307.1
cg24843346		8	142736091	NA		0.512739	0.78633	0.273592	0.237387	5.14415e-21	2.90798e-18	FALSE	.	.
cg24844545	NPPA	1	11908347	TRUE	S_Shore	0.716663	0.810069	0.0934056	0.129142	6.89826e-09	4.9316e-07	FALSE	protein_coding;protein_coding;protein_coding	ENST00000376476.1;ENST00000376480.6;ENST00000610706.1
cg24845165	LPIN3	20	39968231	NA	N_Shore	0.67466	0.470066	-0.204595	-0.255976	9.14648e-14	1.70789e-11	FALSE	protein_coding	ENST00000373257.6
cg24851181	FOXL2NB	3	138668187	TRUE	N_Shore	0.173888	0.0811953	-0.0926927	-0.116291	2.36535e-17	7.75939e-15	FALSE	protein_coding;protein_coding;protein_coding	ENST00000383165.3;ENST00000470680.4;ENST00000498709.1
cg24910352	GATA4	8	11601603	TRUE		0.353551	0.212548	-0.141003	-0.183919	7.06381e-18	2.51129e-15	FALSE	protein_coding;protein_coding;protein_coding;protein_coding;protein_coding	ENST00000335135.7;ENST00000526716.4;ENST00000528712.4;ENST00000532059.4;ENST00000622443.2
cg24911721	MIRLET7A3;MIRLET7BHG;MIRLET7B	22	46508454	NA		0.819468	0.171256	-0.648212	-0.701379	1.10669e-26	1.21939e-23	FALSE	miRNA;miRNA;miRNA;lincRNA	ENST00000581461.1;ENST00000362116.2;ENST00000385140.1;ENST00000360737.4
cg24914185		2	200663789	TRUE		0.501414	0.800833	0.299419	0.286264	2.1616e-15	5.30318e-13	FALSE	protein_coding;protein_coding	ENST00000416668.4;ENST00000420922.5
cg25035376	KIF5A	12	57943261	NA	N_Shore	0.868945	0.523842	-0.345103	-0.379861	4.6634e-42	2.88477e-38	FALSE	protein_coding;protein_coding	ENST00000286452.5;ENST00000455537.5
cg25043050	FOXI2	10	129534107	NA	N_Shore	0.647059	0.282634	-0.364425	-0.459584	5.29878e-43	3.42458e-39	FALSE	protein_coding;TEC	ENST00000388920.4;ENST00000623953.1
cg25054390	GPR68	14	91720372	NA		0.483421	0.30927	-0.174151	-0.273334	1.38161e-13	2.51371e-11	FALSE	protein_coding;protein_coding	ENST00000529300.1;ENST00000531499.2
cg25095951	RPS26	12	56435247	NA	N_Shore	0.220993	0.50088	0.279887	0.245382	1.64604e-18	6.39253e-16	FALSE	antisense;protein_coding;protein_coding;protein_coding	ENST00000551846.1;ENST00000356464.8;ENST00000548590.1;ENST00000552361.1
cg25135018	IL6R;IL6R	1	154435948	TRUE		0.230933	0.806242	0.575309	0.421368	2.07929e-18	8.00328e-16	FALSE	protein_coding;protein_coding;protein_coding;protein_coding	ENST00000344086.7;ENST00000368485.6;ENST00000502679.1;ENST00000507256.1
cg25153824	CFAP45	1	159870077	TRUE	Island	0.426686	0.218083	-0.208604	-0.214644	1.72174e-21	1.03118e-18	FALSE	protein_coding;protein_coding;protein_coding;miRNA	ENST00000368099.7;ENST00000476696.4;ENST00000479940.2;ENST00000584466.1
cg25156118	LRFN1	19	39799137	NA	N_Shore	0.926602	0.606509	-0.320093	-0.327842	1.07925e-32	2.2727e-29	FALSE	protein_coding	ENST00000248668.4
cg25241559	SNED1	2	241989379	NA		0.914877	0.111941	-0.802936	-0.802864	6.235e-72	1.34993e-66	FALSE	antisense;protein_coding;protein_coding;protein_coding;protein_coding;protein_coding;protein_coding;protein_coding	ENST00000458377.1;ENST00000310397.11;ENST00000401644.5;ENST00000401884.4;ENST00000405547.6;ENST00000431690.4;ENST00000469006.1;ENST00000483962.1
cg25288155	PLEKHB1;PLEKHB1;PLEKHB1;PLEKHB1;PLEKHB1;PLEKHB1	11	73357396	NA		0.701034	0.523138	-0.177896	-0.228177	1.56285e-22	1.04114e-19	FALSE	protein_coding;protein_coding;protein_coding;protein_coding;protein_coding;protein_coding;protein_coding;protein_coding;protein_coding;protein_coding;protein_coding;protein_coding;protein_coding;protein_coding	ENST00000227214.9;ENST00000354190.8;ENST00000398492.7;ENST00000398494.7;ENST00000535582.4;ENST00000536527.4;ENST00000538227.4;ENST00000539157.4;ENST00000541760.1;ENST00000543085.4;ENST00000543524.4;ENST00000544532.4;ENST00000545798.4;ENST00000546251.4
cg25293806	TMEM190	19	55889387	NA	N_Shore	0.569975	0.263692	-0.306283	-0.277216	5.18471e-19	2.18392e-16	FALSE	antisense;protein_coding	ENST00000595064.1;ENST00000291934.3
cg25317941	ECEL1	2	233351153	NA	S_Shore	0.322309	0.119591	-0.202718	-0.192864	2.28639e-21	1.34335e-18	FALSE	protein_coding;protein_coding;protein_coding	ENST00000304546.4;ENST00000409941.1;ENST00000482346.1
cg25320499	WNT2B;WNT2B	1	113052563	TRUE	N_Shore	0.232337	0.0970678	-0.135269	-0.133341	2.12091e-15	5.20926e-13	FALSE	protein_coding;protein_coding;protein_coding	ENST00000256640.8;ENST00000369684.4;ENST00000369686.8
cg25383593		5	134827820	TRUE	Island	0.287084	0.119727	-0.167358	-0.185777	2.10971e-23	1.59154e-20	FALSE	.	.
cg25402787		15	53084679	NA	S_Shelf	0.681575	0.238565	-0.44301	-0.403059	2.70794e-25	2.57147e-22	FALSE	protein_coding	ENST00000561401.3
cg25415695		5	134828036	TRUE	Island	0.732029	0.502993	-0.229036	-0.302659	3.23184e-27	3.79254e-24	FALSE	.	.
cg25431974	ECEL1	2	233352936	NA	N_Shore	0.345302	0.168777	-0.176525	-0.175605	7.02893e-29	1.0012e-25	FALSE	protein_coding;protein_coding	ENST00000304546.4;ENST00000482346.1
cg25432738	CRYL1	13	21009861	NA		0.839847	0.38997	-0.449877	-0.491443	3.1765e-33	7.23937e-30	FALSE	protein_coding;protein_coding;protein_coding	ENST00000298248.10;ENST00000382812.4;ENST00000480748.2
cg25439632		8	49892209	NA	N_Shore	0.253925	0.77197	0.518044	0.423559	1.17329e-24	1.02638e-21	FALSE	.	.
cg25460807		8	21908022	NA	S_Shore	0.758533	0.258784	-0.499748	-0.463126	3.10149e-20	1.55081e-17	FALSE	protein_coding;protein_coding	ENST00000522148.4;ENST00000523300.4
cg25471715	C8orf31	8	144129543	TRUE	S_Shore	0.661838	0.831578	0.16974	0.168042	8.57861e-14	1.61158e-11	FALSE	processed_transcript;processed_transcript;processed_transcript;processed_transcript;processed_transcript	ENST00000395172.4;ENST00000517653.4;ENST00000519775.2;ENST00000524181.4;ENST00000622366.3
cg25485913		19	49568962	TRUE	S_Shore	0.261044	0.157413	-0.103632	-0.13487	7.87942e-22	4.91633e-19	FALSE	protein_coding;protein_coding;protein_coding	ENST00000594938.1;ENST00000595857.4;ENST00000599795.4
cg25491558		10	65472123	TRUE	S_Shore	0.368854	0.79574	0.426887	0.473948	1.96133e-13	3.47643e-11	FALSE	lincRNA	ENST00000444770.1
cg25509697	FOXL2;FOXL2NB	3	138666732	NA	Island	0.433631	0.221098	-0.212533	-0.201322	5.00193e-17	1.56272e-14	FALSE	protein_coding;protein_coding;protein_coding;protein_coding	ENST00000330315.3;ENST00000383165.3;ENST00000470680.4;ENST00000498709.1
cg25520960		2	219863984	NA	S_Shore	0.772257	0.481357	-0.290901	-0.393028	1.74092e-20	8.98507e-18	FALSE	.	.
cg25537245		17	56413890	NA		0.103281	0.333208	0.229927	0.20482	8.43507e-23	5.75203e-20	FALSE	antisense;antisense;antisense;antisense;antisense;antisense;antisense;antisense;antisense;antisense;antisense;miRNA	ENST00000578025.4;ENST00000578334.4;ENST00000579527.4;ENST00000579859.1;ENST00000580022.4;ENST00000580515.4;ENST00000580633.4;ENST00000582348.1;ENST00000583826.4;ENST00000583841.1;ENST00000585236.4;ENST00000581591.1
cg25556035	NFIX	19	13127873	NA	Island	0.786187	0.0470276	-0.739159	-0.785114	2.67535e-54	7.24047e-50	FALSE	protein_coding;protein_coding;protein_coding;protein_coding	ENST00000397661.5;ENST00000585382.4;ENST00000590027.1;ENST00000592199.4
cg25591794	URAD	13	28554842	NA	S_Shore	0.107713	0.0219646	-0.0857481	-0.223551	3.5647e-11	4.16508e-09	FALSE	protein_coding	ENST00000332715.5
cg25607643		15	40730161	NA	Island	0.624722	0.40456	-0.220162	-0.281401	1.419e-18	5.58085e-16	FALSE	.	.
cg25642234	PLBD1	12	14721092	NA	Island	0.586582	0.331515	-0.255067	-0.309311	1.34618e-33	3.27484e-30	FALSE	protein_coding;protein_coding;antisense;antisense	ENST00000240617.8;ENST00000541618.1;ENST00000542401.1;ENST00000545424.4
cg25653223		7	20833088	NA	Island	0.215947	0.0706868	-0.14526	-0.113427	4.56288e-16	1.23488e-13	FALSE	.	.
cg25663970	B4GALNT1	12	58024478	NA	Island	0.704307	0.56501	-0.139297	-0.241051	1.38743e-29	2.08606e-26	FALSE	protein_coding;protein_coding;protein_coding;protein_coding;protein_coding;protein_coding;protein_coding;protein_coding;protein_coding;protein_coding;protein_coding	ENST00000341156.7;ENST00000418555.5;ENST00000449184.6;ENST00000548888.4;ENST00000549391.4;ENST00000550764.4;ENST00000552219.4;ENST00000552350.4;ENST00000552468.1;ENST00000552798.4;ENST00000553142.4
cg25690897	CCDC105	19	15133948	NA		0.382446	0.167054	-0.215391	-0.236589	5.20991e-24	4.31355e-21	FALSE	protein_coding;protein_coding	ENST00000292574.3;ENST00000595863.1
cg25721982	TBX1;TBX1;TBX1	22	19746156	TRUE	Island	0.298849	0.162688	-0.136161	-0.192915	1.85631e-21	1.10263e-18	FALSE	protein_coding;protein_coding;protein_coding;protein_coding	ENST00000329705.10;ENST00000332710.7;ENST00000359500.6;ENST00000621939.1
cg25730428	MAS1L	6	29454755	NA	S_Shelf	0.385177	0.833835	0.448658	0.351468	1.3065e-17	4.45113e-15	FALSE	protein_coding	ENST00000377127.4
cg25741116		17	78418034	TRUE	S_Shore	0.511882	0.199723	-0.312159	-0.349681	1.54438e-20	8.00889e-18	FALSE	.	.
cg25744552		1	117368140	TRUE	N_Shore	0.381495	0.67181	0.290315	0.32102	2.18301e-27	2.59693e-24	FALSE	.	.
cg25748108	LPIN3	20	39968608	NA	S_Shore	0.415306	0.259793	-0.155513	-0.179145	6.4237e-20	3.0433e-17	FALSE	protein_coding	ENST00000373257.6
cg25762706	STMN4;STMN4	8	27115867	NA	S_Shelf	0.719299	0.485165	-0.234134	-0.329338	1.30673e-28	1.81358e-25	FALSE	protein_coding;protein_coding;protein_coding;protein_coding;protein_coding;protein_coding;protein_coding	ENST00000265770.10;ENST00000350889.7;ENST00000519614.4;ENST00000519997.4;ENST00000522750.1;ENST00000522908.1;ENST00000523048.4
cg25779645	R3HDML	20	42965025	TRUE	S_Shore	0.598237	0.376518	-0.221718	-0.222426	7.8388e-27	8.77091e-24	FALSE	protein_coding	ENST00000217043.2
cg25782983		11	74950764	NA	Island	0.741147	0.518116	-0.223031	-0.280531	6.54578e-19	2.73068e-16	FALSE	lincRNA;lincRNA;protein_coding	ENST00000530792.1;ENST00000603012.1;ENST00000562197.2
cg25821249		17	35423464	NA	S_Shelf	0.791484	0.61495	-0.176534	-0.271464	8.61672e-27	9.59176e-24	FALSE	.	.
cg25845985	PRRT1	6	32118405	NA		0.305402	0.0544076	-0.250995	-0.246939	1.92373e-38	8.33008e-35	FALSE	protein_coding;protein_coding;protein_coding;protein_coding;protein_coding;protein_coding	ENST00000211413.8;ENST00000375150.5;ENST00000428778.4;ENST00000467780.4;ENST00000472641.1;ENST00000495191.4
cg25875537		8	21909033	TRUE	N_Shore	0.414803	0.215806	-0.198997	-0.250324	2.01787e-27	2.42043e-24	FALSE	protein_coding;protein_coding	ENST00000522148.4;ENST00000523300.4
cg25897951	CTBP1;CTBP1;CTBP1-DT	4	1244024	NA	S_Shelf	0.626026	0.850522	0.224497	0.405756	6.91936e-32	1.33759e-28	FALSE	protein_coding;protein_coding;protein_coding;protein_coding;protein_coding;protein_coding;protein_coding;antisense;antisense;antisense;antisense;antisense	ENST00000290921.9;ENST00000382952.6;ENST00000506180.4;ENST00000513420.1;ENST00000514210.4;ENST00000514495.1;ENST00000515399.4;ENST00000357591.2;ENST00000507044.1;ENST00000514984.1;ENST00000578730.1;ENST00000581398.1
cg25936358		13	114301996	NA	Island	0.426363	0.95831	0.531947	0.500309	7.44462e-11	8.22781e-09	FALSE	.	.
cg25969122		11	119630362	NA		0.10517	0.462738	0.357568	0.42709	1.72061e-30	2.88781e-27	FALSE	.	.
cg26006870		8	11559039	NA		0.272362	0.11641	-0.155952	-0.139951	3.06e-12	4.37594e-10	FALSE	protein_coding;protein_coding;protein_coding	ENST00000526974.1;ENST00000528712.4;ENST00000532977.1
cg26008908	MSI1	12	120799332	TRUE		0.308822	0.172526	-0.136296	-0.164805	1.73774e-23	1.33181e-20	FALSE	protein_coding;protein_coding;protein_coding	ENST00000257552.5;ENST00000546622.1;ENST00000546985.1
cg26049998	PITPNC1;PITPNC1	17	65602730	TRUE	N_Shore	0.46203	0.877721	0.41569	0.407505	2.68714e-08	1.66297e-06	FALSE	protein_coding;protein_coding;protein_coding;protein_coding;protein_coding	ENST00000299954.12;ENST00000578527.1;ENST00000580974.4;ENST00000581322.4;ENST00000581923.4
cg26050734	CELF3;CELF3	1	151689032	NA		0.451044	0.339059	-0.111985	-0.140289	4.48867e-18	1.65138e-15	FALSE	protein_coding;protein_coding;protein_coding;protein_coding;protein_coding;protein_coding	ENST00000290583.7;ENST00000290585.7;ENST00000420342.1;ENST00000478829.1;ENST00000479893.4;ENST00000326413.6
cg26053832		16	54971600	TRUE		0.234629	0.0988563	-0.135772	-0.13518	5.47702e-20	2.62641e-17	FALSE	lincRNA	ENST00000560487.1
cg26058474	SNED1	2	241975035	TRUE	N_Shelf	0.801307	0.130388	-0.670919	-0.630021	8.11461e-29	1.15206e-25	FALSE	antisense;protein_coding;protein_coding;protein_coding;protein_coding	ENST00000458377.1;ENST00000310397.11;ENST00000401884.4;ENST00000405547.6;ENST00000493358.1
cg26103104		5	139490895	NA	Island	0.697845	0.209825	-0.48802	-0.506868	2.89122e-25	2.72756e-22	FALSE	protein_coding	ENST00000505703.1
cg26105278	TP73;TP73;TP73;TP73	1	3624054	NA	S_Shelf	0.252716	0.141239	-0.111478	-0.148441	1.91502e-17	6.38367e-15	FALSE	protein_coding;protein_coding;protein_coding;protein_coding;protein_coding;protein_coding;protein_coding;protein_coding;protein_coding;protein_coding;protein_coding;protein_coding;protein_coding	ENST00000346387.7;ENST00000354437.7;ENST00000357733.6;ENST00000378280.4;ENST00000378285.4;ENST00000378288.7;ENST00000378290.4;ENST00000378295.7;ENST00000603362.4;ENST00000603364.4;ENST00000604074.4;ENST00000604194.1;ENST00000604479.4
cg26110645		2	73090063	TRUE	S_Shore	0.364557	0.193623	-0.170933	-0.124436	6.93632e-12	9.28743e-10	FALSE	.	.
cg26128192		6	27256032	NA	Island	0.126242	0.0402476	-0.0859948	-0.0764478	3.35707e-20	1.66514e-17	FALSE	protein_coding	ENST00000429945.1
cg26132737	ANKRD44	2	198029141	TRUE	Island	0.774565	0.417183	-0.357382	-0.394514	2.4415e-21	1.43254e-18	FALSE	protein_coding;protein_coding;protein_coding;protein_coding;protein_coding;protein_coding;protein_coding	ENST00000282272.11;ENST00000328737.5;ENST00000409153.4;ENST00000409919.4;ENST00000443014.1;ENST00000447713.1;ENST00000463879.1
cg26167841		10	102807218	NA		0.466762	0.239988	-0.226773	-0.295171	2.14519e-19	9.48831e-17	FALSE	.	.
cg26175343	LRRN4	20	6034888	NA	Island	0.84166	0.581259	-0.260401	-0.366658	3.92159e-40	2.07088e-36	FALSE	protein_coding	ENST00000378858.4
cg26189139		8	22560972	NA		0.471825	0.206949	-0.264876	-0.285835	9.86225e-22	6.09205e-19	FALSE	processed_transcript	ENST00000523627.1
cg26216433		14	104346591	TRUE	N_Shore	0.298906	0.665053	0.366147	0.438818	5.22131e-24	4.31474e-21	FALSE	lincRNA	ENST00000555967.1
cg26232308		1	18201537	TRUE	S_Shore	0.439024	0.214381	-0.224643	-0.246722	5.77797e-27	6.56684e-24	FALSE	.	.
cg26256793	COL11A1;COL11A1;COL11A1;COL11A1	1	103574469	TRUE	N_Shore	0.336798	0.144264	-0.192534	-0.23951	2.35382e-35	7.2287e-32	FALSE	protein_coding;protein_coding;protein_coding;protein_coding;protein_coding	ENST00000353414.7;ENST00000358392.5;ENST00000370096.6;ENST00000427239.4;ENST00000512756.4
cg26262157	PFKFB3	10	6214079	NA		0.36079	0.660316	0.299526	0.418038	1.23172e-22	8.28192e-20	FALSE	protein_coding;protein_coding	ENST00000379789.7;ENST00000536985.4
cg26266099		1	33391638	NA	S_Shore	0.289868	0.100311	-0.189557	-0.145927	2.86952e-08	1.75999e-06	FALSE	.	.
cg26290219		6	33128906	NA		0.508666	0.744166	0.2355	0.21368	5.52498e-12	7.52569e-10	FALSE	.	.
cg26296337	OTOP3	17	72931792	NA	Island	0.379241	0.189763	-0.189478	-0.192151	2.41111e-23	1.80945e-20	FALSE	protein_coding;protein_coding;protein_coding	ENST00000626282.1;ENST00000328801.4;ENST00000580749.1
cg26302230	WNT6	2	219733839	NA	Island	0.645741	0.412619	-0.233122	-0.277288	3.31561e-35	1.01107e-31	FALSE	protein_coding;protein_coding	ENST00000233948.3;ENST00000486233.1
cg26305174	SLC12A9;TRIP6	7	100463583	NA		0.549049	0.971998	0.422948	0.325845	8.12222e-06	0.000218655	FALSE	protein_coding;protein_coding;protein_coding;protein_coding;protein_coding;protein_coding;protein_coding;protein_coding;protein_coding;protein_coding	ENST00000354161.6;ENST00000467972.4;ENST00000475687.4;ENST00000487651.4;ENST00000200457.7;ENST00000417475.4;ENST00000437505.4;ENST00000476870.4;ENST00000496260.1;ENST00000629911.1
cg26326372	CRIP2	14	105946393	NA	N_Shore	0.215289	0.443235	0.227946	0.317885	4.16539e-25	3.78926e-22	FALSE	protein_coding;protein_coding;protein_coding;protein_coding;protein_coding;protein_coding;protein_coding	ENST00000329146.7;ENST00000538259.2;ENST00000547643.4;ENST00000548309.1;ENST00000548989.4;ENST00000550577.4;ENST00000552643.4
cg26380291	TCF7L2;TCF7L2;TCF7L2;TCF7L2;TCF7L2;TCF7L2	10	114787843	TRUE		0.515251	0.367726	-0.147524	-0.171143	8.1638e-19	3.33812e-16	FALSE	protein_coding;protein_coding;protein_coding;protein_coding;protein_coding;protein_coding;protein_coding;protein_coding;protein_coding;protein_coding;protein_coding;protein_coding;protein_coding;protein_coding;protein_coding	ENST00000346198.5;ENST00000349937.5;ENST00000352065.8;ENST00000355717.7;ENST00000355995.7;ENST00000369395.4;ENST00000369397.7;ENST00000534894.4;ENST00000536810.4;ENST00000538897.4;ENST00000542695.4;ENST00000543371.4;ENST00000545257.4;ENST00000627217.1;ENST00000629706.1
cg26381313	SEC31B	10	102279455	TRUE	N_Shore	0.29614	0.0783801	-0.21776	-0.188258	3.3901e-18	1.26115e-15	FALSE	protein_coding;protein_coding;protein_coding;protein_coding;protein_coding;protein_coding;protein_coding;protein_coding;protein_coding;protein_coding	ENST00000527595.4;ENST00000528174.4;ENST00000529568.4;ENST00000533549.1;ENST00000557395.4;ENST00000370345.6;ENST00000462434.4;ENST00000479697.4;ENST00000480905.1;ENST00000482456.5
cg26435928		3	75668758	NA		0.437258	0.0531459	-0.384112	-0.295459	1.50727e-34	4.21079e-31	FALSE	unprocessed_pseudogene	ENST00000308076.7
cg26458072	SEC31B	10	102279694	TRUE	N_Shore	0.397042	0.0864843	-0.310557	-0.280444	3.37441e-11	3.95984e-09	FALSE	protein_coding;protein_coding;protein_coding;protein_coding;protein_coding;protein_coding;protein_coding;protein_coding;protein_coding;protein_coding	ENST00000527595.4;ENST00000528174.4;ENST00000529568.4;ENST00000533549.1;ENST00000557395.4;ENST00000370345.6;ENST00000462434.4;ENST00000479697.4;ENST00000480905.1;ENST00000482456.5
cg26458452		7	140341135	NA	N_Shore	0.415	0.260732	-0.154268	-0.154842	3.03632e-26	3.1758e-23	FALSE	protein_coding;protein_coding;protein_coding;protein_coding;protein_coding;protein_coding	ENST00000275884.9;ENST00000475837.1;ENST00000477488.1;ENST00000489552.1;ENST00000491728.4;ENST00000496613.4
cg26479374	CTBP1;CTBP1;CTBP1-DT	4	1243980	NA		0.744183	0.957791	0.213608	0.431336	3.11387e-28	4.11086e-25	FALSE	protein_coding;protein_coding;protein_coding;protein_coding;protein_coding;protein_coding;protein_coding;antisense;antisense;antisense;antisense;antisense	ENST00000290921.9;ENST00000382952.6;ENST00000506180.4;ENST00000513420.1;ENST00000514210.4;ENST00000514495.1;ENST00000515399.4;ENST00000357591.2;ENST00000507044.1;ENST00000514984.1;ENST00000578730.1;ENST00000581398.1
cg26647111		11	31128758	NA	N_Shore	0.0803176	0.0408122	-0.0395054	-0.0748897	1.40528e-20	7.32263e-18	FALSE	protein_coding;protein_coding;protein_coding;protein_coding	ENST00000342355.7;ENST00000437348.4;ENST00000534722.4;ENST00000597505.4
cg26669717	PRKAR1B;PRKAR1B;PRKAR1B;PRKAR1B;PRKAR1B;PRKAR1B	7	641028	NA	N_Shore	0.497727	0.768309	0.270581	0.224594	1.99334e-12	2.95296e-10	FALSE	protein_coding;protein_coding;protein_coding;protein_coding;protein_coding;protein_coding;protein_coding;protein_coding	ENST00000360274.7;ENST00000400758.5;ENST00000403562.4;ENST00000406797.4;ENST00000414568.4;ENST00000430040.4;ENST00000537384.4;ENST00000544935.4
cg26688911	LPIN3	20	39969536	TRUE	N_Shore	0.474133	0.263939	-0.210193	-0.182416	2.87175e-10	2.81658e-08	FALSE	protein_coding	ENST00000373257.6
cg26705561	SEC31B	10	102279791	TRUE	Island	0.817208	0.569257	-0.247951	-0.256141	5.7293e-23	3.98857e-20	FALSE	protein_coding;protein_coding;protein_coding;protein_coding;protein_coding;protein_coding;protein_coding;protein_coding;protein_coding;protein_coding	ENST00000527595.4;ENST00000528174.4;ENST00000529568.4;ENST00000533549.1;ENST00000557395.4;ENST00000370345.6;ENST00000462434.4;ENST00000479697.4;ENST00000480905.1;ENST00000482456.5
cg26743024	CACNG4	17	64960282	NA	Island	0.40528	0.219825	-0.185456	-0.27286	6.89774e-31	1.19474e-27	FALSE	protein_coding	ENST00000262138.3
cg26783727		16	67204807	TRUE	Island	0.364587	0.181127	-0.18346	-0.179503	2.7719e-19	1.21118e-16	FALSE	protein_coding;protein_coding;protein_coding;protein_coding;protein_coding;protein_coding;protein_coding;protein_coding	ENST00000268605.10;ENST00000563439.4;ENST00000564053.4;ENST00000564992.1;ENST00000565560.4;ENST00000565645.1;ENST00000568086.1;ENST00000568199.1
cg26808436	NR2E1	6	108492696	NA	S_Shelf	0.319242	0.121464	-0.197779	-0.143327	1.66297e-12	2.4986e-10	FALSE	protein_coding;protein_coding;protein_coding	ENST00000368983.3;ENST00000368986.7;ENST00000426403.1
cg26817546		5	135538704	TRUE	Island	0.382742	0.108857	-0.273885	-0.247079	6.02685e-28	7.65318e-25	FALSE	.	.
cg26837178	NODAL	10	72201611	TRUE	S_Shelf	0.287071	0.138578	-0.148493	-0.144441	1.23439e-18	4.92187e-16	FALSE	protein_coding;protein_coding	ENST00000287139.6;ENST00000414871.1
cg26854298		4	174442087	NA	N_Shore	0.470947	0.249405	-0.221542	-0.243145	3.14533e-23	2.3163e-20	FALSE	.	.
cg26861732		20	21372126	TRUE	S_Shore	0.626556	0.12399	-0.502566	-0.457344	2.68593e-22	1.75423e-19	FALSE	.	.
cg26890706	RNF182;RNF182;RNF182;RNF182	6	13924425	NA	N_Shore	0.741018	0.340982	-0.400036	-0.478025	8.65531e-45	6.94056e-41	FALSE	protein_coding;protein_coding;protein_coding;protein_coding;protein_coding;protein_coding;protein_coding;protein_coding	ENST00000420478.2;ENST00000423553.5;ENST00000471906.1;ENST00000488300.4;ENST00000488763.4;ENST00000537388.1;ENST00000537663.4;ENST00000544682.4
cg26910511	LRFN1	19	39799037	NA	Island	0.864132	0.324036	-0.540096	-0.470618	7.65298e-32	1.47283e-28	FALSE	protein_coding	ENST00000248668.4
cg26916780	ZNF609	15	64889554	TRUE		0.189397	0.562973	0.373575	0.379472	1.99309e-14	4.17736e-12	FALSE	protein_coding;protein_coding	ENST00000326648.4;ENST00000558680.4
cg26922546		5	72678459	TRUE	Island	0.43363	0.242771	-0.190859	-0.142947	2.40778e-13	4.21598e-11	FALSE	transcribed_processed_pseudogene	ENST00000505955.1
cg27038634		8	49468341	TRUE		0.453394	0.246204	-0.20719	-0.268185	1.0656e-32	2.26188e-29	FALSE	lincRNA;antisense	ENST00000524011.1;ENST00000522575.1
cg27097923	TPBG	6	83071433	NA	N_Shore	0.489528	0.179931	-0.309596	-0.299417	1.78879e-22	1.18437e-19	FALSE	protein_coding	ENST00000535040.3
cg27110277	FGF20	8	16860121	NA	N_Shore	0.591281	0.278094	-0.313187	-0.333369	1.89147e-21	1.12044e-18	FALSE	protein_coding;protein_coding	ENST00000180166.5;ENST00000519941.1
cg27111444		12	54590808	TRUE		0.746905	0.462257	-0.284648	-0.442355	6.52471e-55	1.88354e-50	FALSE	.	.
cg27118035	ZNF267	16	31891978	TRUE		0.109119	0.560374	0.451255	0.479926	4.19719e-34	1.08182e-30	FALSE	protein_coding;protein_coding;protein_coding;protein_coding;protein_coding	ENST00000300870.13;ENST00000394846.6;ENST00000561814.1;ENST00000562971.1;ENST00000566541.4
cg27161197		12	47224649	TRUE	N_Shore	0.814247	0.584778	-0.229469	-0.279959	3.15677e-19	1.37381e-16	FALSE	lincRNA;protein_coding	ENST00000611243.1;ENST00000546940.1
cg27162435	KCNAB3	17	7833163	NA	N_Shore	0.780967	0.0859929	-0.694974	-0.648813	6.85004e-40	3.53118e-36	FALSE	protein_coding;protein_coding;protein_coding;protein_coding	ENST00000303790.2;ENST00000570587.4;ENST00000570852.1;ENST00000573621.1
cg27175287	FOXE3;FOXE3	1	47883234	TRUE	Island	0.426826	0.221708	-0.205118	-0.209544	4.83981e-22	3.05945e-19	FALSE	protein_coding	ENST00000335071.3
cg27192248		15	65285669	NA		0.350496	0.871742	0.521246	0.282561	3.74871e-16	1.02107e-13	FALSE	.	.
cg27195326	CNTN1;CNTN1	12	41087459	NA	Island	0.407853	0.218326	-0.189527	-0.220612	3.01675e-22	1.94102e-19	FALSE	protein_coding;protein_coding;protein_coding	ENST00000547702.4;ENST00000551295.5;ENST00000551424.4
cg27212232	DOK5	20	53091600	NA	N_Shore	0.315152	0.157975	-0.157177	-0.195525	6.40148e-23	4.44224e-20	FALSE	protein_coding;protein_coding;protein_coding	ENST00000262593.8;ENST00000395939.4;ENST00000491469.1
cg27262041	NAV2	11	19654032	TRUE		0.505148	0.834715	0.329567	0.144402	5.76573e-07	2.38556e-05	FALSE	protein_coding	ENST00000360655.7
cg27274604	SLIT1	10	98924236	TRUE	N_Shore	0.723227	0.579253	-0.143974	-0.256381	4.57917e-19	1.95164e-16	FALSE	protein_coding;protein_coding;protein_coding;protein_coding;protein_coding;protein_coding	ENST00000479633.2;ENST00000266058.7;ENST00000314867.8;ENST00000371041.3;ENST00000371070.7;ENST00000456008.2
cg27287167	PIK3R2	19	18267904	NA		0.476804	0.805336	0.328532	0.320849	9.56611e-09	6.62132e-07	FALSE	protein_coding;protein_coding;protein_coding;protein_coding;protein_coding	ENST00000222254.11;ENST00000426902.4;ENST00000593731.1;ENST00000617130.3;ENST00000617642.1
cg27293992		2	171671648	TRUE	N_Shore	0.185445	0.107495	-0.0779494	-0.0983961	9.20869e-15	2.03342e-12	FALSE	protein_coding;protein_coding;protein_coding;protein_coding	ENST00000358196.6;ENST00000445006.4;ENST00000454603.4;ENST00000625689.1
cg27355653	MIR9-3HG	15	89940260	NA		0.731987	0.216352	-0.515634	-0.581758	4.99369e-35	1.48107e-31	FALSE	lincRNA	ENST00000536780.5
cg27364650		3	43899898	TRUE	S_Shore	0.396084	0.249903	-0.146181	-0.242583	6.62433e-19	2.75284e-16	FALSE	.	.
cg27367526	STEAP2;STEAP2;STEAP2	7	89841692	NA	Island	0.510606	0.355718	-0.154888	-0.309962	8.0065e-34	2.00402e-30	TRUE	protein_coding;protein_coding;protein_coding;protein_coding;protein_coding;protein_coding;protein_coding;protein_coding;protein_coding;processed_transcript;processed_transcript	ENST00000287908.6;ENST00000394621.5;ENST00000394622.5;ENST00000394626.4;ENST00000394629.2;ENST00000394632.4;ENST00000402625.5;ENST00000426158.1;ENST00000428074.4;ENST00000433534.1;ENST00000478318.5
cg27369013	PLCD4;PLCD4	2	219472724	TRUE	N_Shore	0.508704	0.181815	-0.326889	-0.292132	3.07425e-40	1.64346e-36	FALSE	protein_coding;protein_coding;protein_coding;protein_coding;protein_coding;protein_coding;protein_coding;protein_coding;protein_coding	ENST00000415854.4;ENST00000417849.4;ENST00000444453.4;ENST00000446503.4;ENST00000450993.5;ENST00000465713.4;ENST00000469493.4;ENST00000473443.4;ENST00000483685.4
cg27392771	NFIX	19	13125851	TRUE		0.871719	0.379588	-0.492131	-0.530938	2.49308e-68	2.69887e-63	FALSE	antisense;protein_coding;protein_coding;protein_coding;protein_coding	ENST00000586630.1;ENST00000397661.5;ENST00000585382.4;ENST00000590027.1;ENST00000592199.4
cg27393487	CYP4F22	19	15661527	NA	N_Shelf	0.914633	0.678518	-0.236116	-0.242477	7.38892e-17	2.26436e-14	FALSE	protein_coding;protein_coding	ENST00000269703.6;ENST00000601005.2
cg27423216	NTF3	12	5543269	TRUE		0.621525	0.167714	-0.453811	-0.607932	1.004e-56	4.3475e-52	FALSE	protein_coding;protein_coding;protein_coding	ENST00000423158.3;ENST00000535299.4;ENST00000543548.1
cg27427318		1	61509328	TRUE		0.414231	0.138463	-0.275769	-0.235135	4.10446e-32	8.11555e-29	FALSE	protein_coding	ENST00000371191.4
cg27436995	FBXL16	16	743998	NA	S_Shore	0.216441	0.0519257	-0.164515	-0.490346	1.66545e-12	2.50146e-10	FALSE	protein_coding;protein_coding;protein_coding;protein_coding;protein_coding	ENST00000324361.8;ENST00000397621.4;ENST00000562563.1;ENST00000562648.2;ENST00000620831.3
cg27503360	CRHR1;CRHR1;CRHR1;CRHR1	17	43890749	TRUE		0.561585	0.381377	-0.180209	-0.246319	2.17653e-27	2.59635e-24	FALSE	protein_coding;protein_coding;protein_coding;protein_coding;protein_coding;protein_coding;protein_coding;protein_coding;protein_coding;protein_coding;processed_transcript;processed_transcript	ENST00000293493.10;ENST00000314537.8;ENST00000339069.8;ENST00000347197.8;ENST00000352855.8;ENST00000398285.6;ENST00000577353.4;ENST00000580955.4;ENST00000582766.4;ENST00000619154.3;ENST00000582044.4;ENST00000587305.1
cg27508620		7	21209725	NA	S_Shore	0.779061	0.390199	-0.388862	-0.478123	3.61567e-24	3.04009e-21	FALSE	.	.
cg27516568	TMEM155;PP12613	4	122686667	NA		0.699367	0.465062	-0.234305	-0.227757	1.60227e-13	2.88727e-11	FALSE	antisense;protein_coding;protein_coding;protein_coding;protein_coding;protein_coding;protein_coding;protein_coding;protein_coding	ENST00000424958.2;ENST00000337677.8;ENST00000394394.4;ENST00000394396.4;ENST00000461198.4;ENST00000505198.4;ENST00000506551.2;ENST00000513254.4;ENST00000514885.4
cg27532171		1	46952054	TRUE	N_Shore	0.73348	0.506633	-0.226847	-0.333176	5.38628e-33	1.20224e-29	FALSE	.	.
cg27532360	ITGA2B	17	42452994	TRUE	N_Shore	0.664535	0.364046	-0.30049	-0.401787	3.76453e-34	9.81994e-31	FALSE	protein_coding;protein_coding;protein_coding;protein_coding	ENST00000262407.5;ENST00000587295.4;ENST00000588098.1;ENST00000592462.4
cg27584135		3	15975501	TRUE	Island	0.469007	0.846896	0.377889	0.347832	4.60577e-06	0.000137231	FALSE	.	.
cg27615366	PDLIM4;PDLIM4	5	131592974	NA	S_Shore	0.529962	0.356249	-0.173713	-0.160629	1.44532e-12	2.18982e-10	FALSE	protein_coding;protein_coding;protein_coding;protein_coding;protein_coding;protein_coding;protein_coding;protein_coding	ENST00000416053.4;ENST00000431054.4;ENST00000439698.4;ENST00000471826.1;ENST00000253754.6;ENST00000379018.6;ENST00000463615.1;ENST00000474421.1
cg27664689	CACNB4;CACNB4;CACNB4;CACNB4	2	152830665	NA	N_Shore	0.61925	0.29663	-0.32262	-0.424066	3.66432e-26	3.78692e-23	FALSE	protein_coding;protein_coding;protein_coding;protein_coding;protein_coding;protein_coding;protein_coding;protein_coding;protein_coding	ENST00000201943.8;ENST00000360283.9;ENST00000397327.5;ENST00000427385.4;ENST00000439467.4;ENST00000470066.1;ENST00000475848.1;ENST00000534999.4;ENST00000539935.4
